1 **Unexpected organellar locations of ESCRT machinery in *Giardia***  
2 **intestinalis and complex evolutionary dynamics spanning the**  
3 **transition to parasitism in the lineage Fornicata**

4  
5 **Working Title: ESCRTs in *Giardia***

6  
7 Shweta V. Pipaliya<sup>1\*</sup>, Rui Santos<sup>2\*</sup>, Dayana Salas-Leiva<sup>3</sup>, Erina A. Balmer<sup>4</sup>, Corina D.  
8 Wirdnam<sup>4</sup>, Andrew J. Roger<sup>3</sup>, Adrian B. Hehl<sup>2</sup>, Carmen Faso<sup>4†</sup> and Joel B. Dacks<sup>1,5†</sup>

9  
10 <sup>1</sup>Division of Infectious Diseases, Department of Medicine, University of Alberta,  
11 Edmonton, Alberta, Canada

12 <sup>2</sup>Institute of Parasitology, University of Zurich, Zurich, Switzerland

13 <sup>3</sup>Centre for Comparative Genomics and Evolutionary Bioinformatics, Department of  
14 Biochemistry and Molecular Biology, Faculty of Medicine, Dalhousie University, Halifax,  
15 Nova Scotia, Canada

16 <sup>4</sup>Institute of Cell Biology, University of Bern, Bern, Switzerland

17 <sup>5</sup>Institute of Parasitology, Biology Centre, CAS, v.v.i. Branisovska 31  
18 370 05 Ceske Budejovice, Czech Republic

19  
20 \*These authors contributed equally to this work.

21 †Authors for correspondence: Carmen Faso ([carmen.faso@izb.unibe.ch](mailto:carmen.faso@izb.unibe.ch)) and Joel B.  
22 Dacks ([dacks@ualberta.ca](mailto:dacks@ualberta.ca))

23  
24 SVP ORCID iD: 0000-0003-0630-4120

25 RS ORCID iD: 0000-0001-6003-9079

26 DS-L ORCID iD: 0000-0003-2356-3351

27 CF ORCID iD: 0000-0002-1831-9365

28 AJR ORCID iD: 0000-0003-1370-9820

29 ABH ORCID iD: 0000-0002-2110-4445

30 JBD ORCID iD: 0000-0003-4520-5694

31 EAB ORCID iD: 0000-0003-4815-2065

32 CDW ORCID iD: 0000-0001-5050-4846

33

34 **Keywords and Abbreviations:** ESCRT/Endosomal Sorting Complexes Required for  
35 Transport, VPS/Vacuolar Protein Sorting, PV/peripheral vacuoles, MVB/Multivesicular  
36 bodies, CHMP/Charged Multivesicular Protein, Fornicata, *Giardia*

37

38 **ABSTRACT**

39 Comparing a parasitic lineage to its free-living relatives is a powerful way to  
40 understand how the evolutionary transition to parasitism occurred. *Giardia intestinalis*  
41 (Fornicata) is a leading cause of gastrointestinal disease world-wide and is famous for its  
42 unusual complement of cellular compartments, such as having peripheral vacuoles  
43 instead of typical endosomal compartments. Endocytosis plays an important role in  
44 *Giardia's* pathogenesis. Endosomal sorting complexes required for transport (ESCRT)  
45 are membrane-deforming proteins associated with the late endosome/multivesicular body  
46 (MVB). MVBs are ill-defined in *G. intestinalis* and roles for identified ESCRT-related  
47 proteins are not fully understood in the context of its unique endocytic system.  
48 Furthermore, components thought to be required for full ESCRT functionality have not yet  
49 been documented in this species.

50 We used genomic and transcriptomic data from several Fornicata species to clarify  
51 the evolutionary genome streamlining observed in *Giardia*, as well as to detect any  
52 divergent orthologs of the Fornicata ESCRT subunits. We observed differences in the  
53 ESCRT machinery complement between *Giardia* strains. Microscopy-based  
54 investigations of key components of ESCRT machinery such as *G*VPS36 and *G*VPS25  
55 link them to peripheral vacuoles, highlighting these organelles as simplified MVB  
56 equivalents. Unexpectedly, we show ESCRT components associated with the  
57 Endoplasmic Reticulum, and for the first time, mitosomes. Finally, we identified the rare  
58 ESCRT component CHMP7 in several fornicate representatives, including *Giardia*, and  
59 show that contrary to current understanding, CHMP7 evolved from a gene fusion of  
60 VPS25 and SNF7 domains, prior to the last eukaryotic common ancestor, over 1.5 billion  
61 years ago. Our findings show that ESCRT machinery in *G. intestinalis* is far more varied  
62 and complete than previously thought, and associating to multiple cellular locations and  
63 presenting changes in ESCRT complement which pre-date adoption of a parasitic  
64 lifestyle.

65  
66  
67  
68

## 69 INTRODUCTION

70 The food and waterborne diarrheal disease known as Giardiasis causes global healthcare  
71 and agricultural burden with approximately 300 million and more than 10 million cases  
72 diagnosed in humans and animals every year, respectively (Lanata et al., 2013). The  
73 causative agent is the diplomonad *Giardia intestinalis*. This enteric protist parasite has  
74 undergone large genome streamlining and modifications in its typical eukaryotic  
75 organelles, particularly in its endomembrane system and the associated trafficking  
76 complement (Faso and Hehl, 2011).

77 *Giardia* relies heavily on its endomembrane trafficking system to secrete virulence  
78 factors while establishing gut infection (Allain and Buret, 2020, Faso et. al., 2019),  
79 performing antigenic variation for immune system evasion (Gargantini et. al., 2016) and  
80 interfering with immune responses by degrading or reducing synthesis of signalling  
81 molecules (Ekman et. al., 2000, Stadelmann et. al., 2012). Endomembrane trafficking is  
82 also required for completion of the life cycle during encystation which features regulated  
83 secretion of large amounts of cyst wall material through COPII- and COPI- associated  
84 lineage specific encystation specific vesicles (ESVs) (Stefanic et. al., 2009). *Giardia's*  
85 endomembrane organization is significantly reduced in its complexity, most notably,  
86 because it lacks a canonical Golgi apparatus, readily identifiable early and late  
87 endosomes, lysosomes, and peroxisomes (Sheffield and Bjorvatn, 1977, Abodeely et al.,  
88 2009). Simplification of the endocytic and secretory pathways in this organism is  
89 underlined by complete loss of several protein complexes associated with membrane  
90 trafficking such as AP3, AP4, AP5, TSET, and the protein complexes that are present are  
91 often reduced in their complement such as Rabs, Rab GEFs, SNAREs, and ARF GEFs  
92 (Elias et al., 2012, Hirst et al., 2014, Venkatesh et al., 2017, Herman et al., 2018, Pipaliya  
93 et al., 2019). However, *Giardia* does harbour a tubulovesicular Endoplasmic reticulum  
94 (ER) thought to carry out functions of the late endosomal pathway (Abodeely et al., 2009).  
95 *Giardia* also has endocytic organelles called peripheral vacuoles (PVs) which perform  
96 bulk flow uptake of nutrients from the host environment and cargo sorting for retrograde  
97 transport (Zumthor et al., 2016; Cernikova et. al., 2020).

98 Endosomal Sorting Complexes Required for Transport (ESCRTs) are evolutionarily  
99 ancient complexes composed of five sub-complexes, ESCRT-0, ESCRTI, II, III, and III-A

100 and recruited onto the growing late endosomal surface in a sequential manner to induce  
101 intraluminal vesicle formation through negative membrane deformation (Raiborg and  
102 Stenmark, 2009; Supplementary figure S1). In model eukaryotes, ESCRT machinery is  
103 required for the biogenesis of multivesicular bodies (MVBs) which have endocytic  
104 characteristics and the ability to mediate exosome biogenesis and release (Vietri et al.,  
105 2019). Nonetheless, additional ESCRTs functions are being discovered in plasma  
106 membrane repair, autophagy functions, post-mitotic nuclear envelope scission, and  
107 others with a shared function in membrane abscission (Hurley et al., 2015, Vietri et al.,  
108 2019). This conserved protein complex is never completely lost by organisms, underlining  
109 its importance, and was already elaborated in the LECA, presumably inherited from the  
110 Asgard archaea (Leung et. al., 2008, Spang et al., 2015, Seitz et al., 2019). Previous  
111 bioinformatics studies have shown *Giardia intestinalis* assemblage AI isolate AWB to  
112 possess patchy ESCRT-II, ESCRT-III, and ESCRT-IIIA machinery (Leung et al., 2008).  
113 However, key components within each of these were reported to be absent (Leung et al.,  
114 2008, Dutta et. al., 2015, Saha et al., 2018).

115 A powerful approach to understanding the evolutionary path to parasitism is to  
116 compare protein complements in parasites with those of free-living relatives.  
117 *Carpodomonas membranifera* is a small heterotrophic flagellate, and the namesake for  
118 the paraphyletic group of free-living organisms (the *Carpodomonas*-like Organisms or  
119 CLOs) that diverged basally to the parasitic diplomonads (Takashita et. al., 2012).  
120 Together the CLOs and diplomonad parasites form the lineage Fornicata, which, in turn,  
121 are grouped with other major parasitic groups such as the parabasalids (e.g.,  
122 *Trichomonas vaginalis*) or anaerobic lineages such as the Preaxostyla in the higher  
123 taxonomic ranked Metamonada (Figure 1).

124

125 To date, although ESCRT complement of representative metamonads (*Giardia*  
126 included) have been reported, no survey has been done of the entire Fornicata lineage  
127 nor other *Giardia intestinalis* assemblages, further raising the important evolutionary  
128 question of whether the losses reported in *Giardia* evolved concurrently with parasitism  
129 or are a product of gradual evolution that predate its movement into this niche.

130 Our initial approach using bio-informatics, traces the evolution of the ESCRT system  
131 in the Fornicata, finding losses of ESCRT components across the lineage, spanning the  
132 transition to parasitism. We also identified several novel components of the ESCRT  
133 machinery in *Giardia* and investigated their subcellular localization, revealing ESCRT  
134 association at PVs and other locations. Evolutionary modification of the ESCRT  
135 complement spans the transition to parasitism in the lineage leading to *Giardia*, and the  
136 modified ESCRT machinery acts at more locations than previously understood in this  
137 globally important parasite.

138

## 139 **RESULTS**

### 140 ***ESCRT losses in Fornicata are gradual and represent a slow transition leading to*** 141 ***parasitism***

142 To understand the extent to which the loss of ESCRT components correlates with  
143 parasitism, versus pre-dating it, we investigated the complement encoded in the  
144 transcriptomes of free-living *Carpediemonas membranifera* and *Carpediemonas*-like  
145 organisms (CLOs) by comparative genomics (Figure 1, Supplementary Table S2). In the  
146 case of ESCRT-III and ESCRT-IIIA SNF7 components (VPS20, VPS32, VPS60, VPS2,  
147 VPS24, and VPS46) which are themselves homologous, we also used phylogenetic  
148 analysis for classification. We took a two-step approach to account for divergent fornicate  
149 sequences, first classifying *Carpediemonas membranifera* sequences, and subsequently  
150 using these as landmarks to classify the fornicate representatives and then to verify the  
151 classification of SNF7 components.

152 This analysis allowed us to resolve the presence of nearly all SNF7 components with  
153 clear clustering with pan-eukaryotic orthologs (Figure 2A, Supplementary Figure S2). The  
154 exception was lack of clear VPS32 or VPS20 orthologs in *Carpediemonas*. Instead,  
155 multiple VPS20-like proteins were identified. This could imply that one of these protein  
156 paralogs may carry out the functions of canonical VPS32 or VPS20 (Figure 2A,  
157 Supplementary Figure S2). We do not rule out the possibility that orthologs of VPS32 and  
158 VPS20 are present in the *Carpediemonas* gene repertoire which remained unexpressed  
159 in standard culturing conditions and, therefore, absent within the assembled  
160 transcriptome. Phylogenetic analyses of the identified SNF7 sequences in the remaining

161 CLOs and diplomonads including the five *Giardia intestinalis* isolates further revealed  
162 that, similar to *Carpodemonas membranifera*, all VPS20 or VPS32 proteins in all  
163 Fornicata lineages have diverged to the extent that no clear clades are resolvable for  
164 either VPS20 or VPS32 (Figure 2B, Supplementary Figure S3).

165 We also notably detected a CHMP7 ortholog in several fornicate representatives,  
166 including *Giardia* and the free-living *Chilomastix cuspidata* and *Dysnectes brevis*. We  
167 further examined these proteins through domain analysis, which revealed that the  
168 characteristic C-terminal SNF7 domain normally required for the recruitment of  
169 downstream ESCRT-III VPS20 and VPS32 was absent from all identified CHMP7  
170 orthologs. Following the same pattern as the VPS20L protein, this finding implies partial  
171 loss of sequence and divergence of the CHMP7 sequences predates the fornicate  
172 common ancestor. Overall, our investigation of the free-living fornicate transcriptomes in  
173 direct comparison with the parasitic diplomonads and various isolates of *Giardia* has been  
174 useful in retracing the timepoints and instances of ESCRT sequence divergence.

175

### 176 ***Losses correlating with parasitism and inter-strain variation***

177 Focusing more specifically on parasitic lineages, including five *Giardia* isolates, the fish  
178 parasite *Spironucleus salmonicida*, and the secondarily free-living *Trepomonas* sp. PC1,  
179 shows additional losses when compared to their free-living relatives (Figure 1). Within the  
180 ESCRT-III machinery, we were unable to classify any of the identified SNF7 proteins as  
181 canonical VPS2 proteins in either *Giardia* or *Trepomonas* sp. (Figure 2B, Supplementary  
182 Figure S7). Instead, phylogenetic classification pointed towards homology to VPS24 and  
183 therefore these proteins were termed VPS24-like (VPS24L) proteins (Figure 2B,  
184 Supplementary Figure S7). Additionally, the coincident loss in all diplomonads of VTA1  
185 and VPS60 (Figure 2A) which interact to regulate VPS4 oligomerization hints at the  
186 dispensability of the ESCRTIII-A components and that alternative factors, potential  
187 paralogs of the unidentified components, may be at play to carry out these functions  
188 (Yang et. al., 2012). Other losses common to all diplomonads include ESCRT-I VPS37  
189 and VPS28 that are not only absent in *Giardia* but also *S. salmonicida* and *Trepomonas*  
190 sp. PC1. These are indicative of adaptive genome streamlining that likely occurred in the  
191 Last Diplomonad Common Ancestor (Figure 1). By contrast, although greater



192 streamlining has occurred in the diplomonads with respect to other fornicates, presence  
193 of VPS23 in *Trepomonas* sp. PC1 still hints at the capacity of these lineages to form  
194 canonical multivesicular bodies.

195 We also observed unanticipated differences between the two human infecting  
196 assemblages, A and B, at the protein complement level. Assemblage A isolates, AWB  
197 and ADH possess two VPS24 paralogues, with one clustering with other canonical VPS24  
198 orthologs from other excavates, the other forming a clearly separate clade, here termed  
199 VPS24L (Figure 2B and Supplementary Figure S7). Additionally, we failed to identify any  
200 orthologs of VPS20L proteins in assemblage B isolates, BGS and BGS-B. Lastly, we find  
201 a similar encoded ESCRT repertoire between the assemblage A, and EP15 strains, as  
202 well as phylogenetic clustering of the EP15 sequences with ADH and AWB (Figure 1,  
203 Figure 2B), consistent with a proposed closer relationship of these strains to one another  
204 than to assemblage B.

205 Previous work analyzing only the *Giardia intestinalis* AWB ESCRT machinery  
206 reported absences in various components such as ESCRT-II VPS36, ESCRT-III CHMP7,  
207 and ESCRT-IIIA subunits (Dutta et. al., 2015, Saha et. al., 2018). Here we show these to  
208 be present but were not previously detected probably due to high sequence divergence  
209 and the lack of the currently available genomes and or transcriptomes from free-living  
210 relatives of *Giardia* (Figure 1 and Supplementary Table S2).

211

### 212 ***Localization of Giardia ESCRT-II VPS25 and newly identified ESCRT-II VPS36 at*** 213 ***peripheral vacuoles***

214 Previous molecular cell biological analyses of ESCRTs in *Giardia* have been  
215 limited to highly conserved ESCRT-III and ESCRT-IIIA components (Saha et. al., 2018).  
216 The bioinformatic identification of multiple newly described ESCRT components,  
217 particularly some with unclear phylogenetic affinity (e.g., VPS20L) make attractive targets  
218 for a molecular cell biological approach.

219 We began by characterizing the ESCRT II component VPS25, which had been  
220 consistently identified in previous phylogenetic analyses but never localized. Past work  
221 from *Giardia* on ESCRT III ESCRT components (Saha 2018) and assuming straight  
222 forward functional homology from model systems, the simple prediction is for Vps25 to



223 associate with PVs. Immunofluorescence assays of standalone staining in transgenic  
224 trophozoites expressing *GVPS25* C-terminally HA-epitope-tagged reporters (*GVPS25*-  
225 HA), revealed an accumulation in the cell periphery and a punctate cytosolic pattern  
226 (Figure 3A and Supplementary Video 1, Figure S4 panel I). Signal overlap analyses on  
227 cells ( $N \geq 15$ ) labelled for *GVPS25*-HA and incubated with the endocytic fluorescent fluid  
228 phase marker Dextran coupled to Texas Red (Dextran-TxR) (Figure 3B and  
229 Supplementary Video 2, Figure S5 panel I) support partial VPS25 association of VPS25  
230 to PVs (Figure 3B, panels II and III). The signal for Vps25 seemed widespread, but  
231 punctate throughout the cell, suggestive of multiple locations. By contrast, the Dextran  
232 signal was clearly restricted to the cell periphery, consistent with its denoting PVs.  
233 Consistent with these observations the Pearson co-efficient describing overall signal  
234 overlap was low, as was the Mander's co-efficient 1, quantifying the degree of Vps25  
235 overlap with Dextran. However, Mander's co-efficient 2, describing the degree of Dextran  
236 overlap with Vps25 was high as was the Costes value, giving us confidence in our results.  
237 Overall, the observations suggest that Vps25 localizes to the PV, consistent with past  
238 reports of other ESCRT components functioning at this organellar system. However, it  
239 also suggested that Vps25 is found at other organelles within *Giardia*.

240 We proceeded to characterize one of the putative ESCRT components newly  
241 identified in our bioinformatic analysis, *GVPS36*, hereafter referred to as *GVPS36A*  
242 (Supplementary Table S2). A molecular cell biological approach here is particularly  
243 informative, given that none of the three *GVPS36* paralogues were identified as  
244 possessing a *bone fide* GLUE domain. In model systems, this functional module mediates  
245 interactions between the ESCRT-I and ESCRT-III sub-complexes (Gill et. al., 2007),  
246 which are in turn necessary for ubiquitin-dependent initiation of ILV biogenesis. Instead  
247 *Giardia* VPS36 paralogues possess an N-terminal PH domain (Supplementary Table 2),  
248 raising questions of functional homology of this component with that of other model  
249 organisms. We chose to test localization of *GVPS36A*, as this was promptly identified by  
250 homology searching, and thus likely to be the least divergent in function. As with VPS25,  
251 a localization pattern associated to the cell periphery and punctate cytosolic foci was  
252 observed (Figure 4A and Supplementary Video 4, Figure S4 panel II). Signal overlap  
253 analyses on cells labelled for *GVPS36A*-HA and incubated with Dextran-TxR support

254 partial VPS36A association to PVs (Figure 4B panels II and III and Supplementary Video  
255 5). The Mander's co-efficients again suggested PV localization, as well as localization to  
256 other organelles, an avenue pursued below.

257

### 258 ***Characterization of ESCRT-III VPS20L and ESCRT-II components at the*** 259 ***Endoplasmic Reticulum***

260 The newly identified ESCRT-III VPS20L protein family was phylogenetically unresolved  
261 in our analyses and the *G. intestinalis* AWB sequence relatively divergent. Both the  
262 novelty and divergence of this protein prompted us to investigate this protein further.  
263 *GVPS20L* was expressed as an N-terminally epitope-tagged reporter (HA-*GVPS20L*)  
264 and detected by immunofluorescence localization assay (Figure 5A and Supplementary  
265 Video 7, Figure S4 panel III) where we observed punctate and dispersed cytosolic  
266 localization, previously seen with *GVPS25-HA* and *GVPS36A-HA* and reminiscent of ER  
267 association of cytosolic components (Faso et al., 2013).

268 This observation, along with the potential for other organellar localization  
269 suggested for VPS25 and Vps36, prompted us to investigate whether all three proteins  
270 might be ER-associated. To do this, we proceeded with signal overlap analyses of cells  
271 ( $N \geq 15$ ) co-labelled for each epitope-tagged reporter in combination with the ER  
272 membrane marker *GiPDI2* (Stefanic et. al., 2006; figures 5B-D). The data shows ESCRT  
273 proteins VPS25 (Supplementary Video 3), VPS36A (Supplementary Video 6) and  
274 VPS20L (Supplementary Video 8) partially associate to the ER (Figure 5B-D panels II  
275 and III). We interpret the low M1 co-efficients (measuring the respective ESCRT  
276 components overlap with PDI) but high M2, as most consistent with the ESCRT proteins  
277 localized to ER as well as other cellular locations, eg. PVs.

278 The observation of Vps25 being in ostensibly the same locations as Vps36 and  
279 Vps20, at PVs and ER respectively, leads to a prediction that it should show overlap in  
280 localization with these two proteins. This was assessed by developing and investigating  
281 dually-transgenic *Giardia* lines expressing *GVPS25-HA* in combination with either  
282 *GVPS36-V5* (Figure 6A panel I) or *V5-GVPS20L* (Figure 6B panel I). Based on the  
283 signal overlap analysis of co-labelled cells ( $\geq 15$ ), there is significant signal overlap in  
284 subcellular location for both *GVPS25HA* and *GVPS36A-V5* (Figure 6A panels II and III)

285 and *GVPS25*-HA and *GV5*-VPS20L (Figure 6B panels II and III) in co-expressing cells.  
286 Notably, the Pearson co-efficients and both Manders' coefficients are substantially higher  
287 for ESCRT component overlap (Figure 6) than observed for the previous co-localizations  
288 against organellar markers (Figures 3,4,5), suggesting we are capturing a consistent  
289 picture of a multi-faceted cellular ESCRT localization.

290

291 ***Evolutionary and protein analyses of the newly identified Giardia ESCRT-III CHMP7***  
292 ***reveal unsuspected ancient origins and a novel ER-Mitosomal interaction***

293 Perhaps the most surprising finding from the comparative genomics analysis was  
294 the identification of CHMP7 homologues in multiple Fornicata representatives, despite it  
295 being frequently not identified in many genomes across eukaryotes (Figure 1). Fornicate  
296 CHMP7 proteins were also highly divergent, missing the C-terminal domain in both  
297 *Giardia* and the CLO orthologs.

298 CHMP7 is currently proposed as being derived from a pre-LECA fusion of two  
299 SNF7 domains (Horii et al., 2006). In order to first validate the putative CHMP7 candidates  
300 as not being divergent in-paralogs of SNF7, we undertook a combined phylogenetic and  
301 structural homology approach. HHPRED and iTASSER analyses of the *Giardia* CHMP7  
302 showed a lack of a predicted C-terminal SNF7 domain. Surprisingly, they also showed  
303 sequence and structural homology of the remainder, *i.e.*, the N-terminus of this protein,  
304 to the ESCRT-II VPS25 (Figure 7, Supplementary Table 3) rather than to SNF7.

305 Analyses with selected CHMP7 N-termini from several representatives of other  
306 eukaryotic supergroups confirmed this homology assessment (Figure 7A, Supplementary  
307 Table 3). The identity of the fornicate proteins as CHMP7 and not as in-paralogues of  
308 VPS25 or SNF7 was also confirmed through our phylogenetic analyses (Figures S9,  
309 S11). Our collective structural prediction and phylogenetic findings suggest that a  
310 duplication event followed by a fusion event between the VPS20/32 SNF7 and VPS25  
311 had occurred prior to the last eukaryotic common ancestor but subsequent to  
312 eukaryogenesis from the presumed Asgard archaeal ancestor.

313 CHMP7 has been shown to have a variety of functions beyond the endocytic  
314 pathway in mammalian or yeast model cell systems (Vietri et. al., 2015, Bauer et. al. 2015,  
315 Gu et. al., 2017). Therefore, following the identification of this protein in *Giardia* we aimed

316 to investigate its role in the endomembrane system as well as its relation to the remainder  
317 of ESCRTs in this parasite. Based on *GiCHMP7*'s similarity to VPS25 and lack of a SNF7  
318 domain, we expected similar localization and protein interaction patterns as ESCRT-II  
319 components, specifically at the PVs and at the ER. However, our immunofluorescence  
320 assay analyses with an N-terminally epitope-tagged *GiCHMP7* reporter (HA- *GiCHMP7*)  
321 yielded a distinct localization pattern strongly reminiscent of ER labelling, with no obvious  
322 indication of PV association (Figure 8A, Figure S4 panel IV and Supplementary Video 9).  
323 As done for *GVPS25*-HA, *GVPS36A*-HA and *GiHA*-VPS20L, HA-*GiCHMP7* cells were  
324 co-labelled for *GIPDI2* and a signal overlap analysis was performed ( $N \geq 15$  cells), showing  
325 that HA-*GiCHMP7* is partially ER-associated, particularly taking M2 and the Costes  
326 values into account (Figure 8B panels II and III and Supplementary Video 10).

327 Surprisingly, we repeatedly detected CHMP7 signal in compartments consistent  
328 with the location of central mitosome complexes (CMC) (Regoes et al., 2005; Figure 8C  
329 and Supplementary Video 11). To test this, we co-labelled HA-*GiCHMP7*-expressing cells  
330 with antibodies directed against iron-sulfur cluster assembly component *GiIscU* to  
331 detect mitosomes (Rout et al., 2016; Figure 8C, panel I). We measured significant signal  
332 overlap limited to the CMC with *GiCHMP7* and *GiIscU*-derived labels, with the low M2  
333 denoting CHMP7 presence at multiple cellular locales, but very high M2 values indicating  
334 strong overlap with the *IscU* signal (Figure 8C, panels II and III).

335

## 336 **DISCUSSION**

337 *Giardia intestinalis* remains a cause of substantial health burden world-wide and its  
338 divergent cellular and genomic features an enigma from an evolutionary perspective. Our  
339 work has specifically addressed the reduced endomembrane system observed in *Giardia*  
340 *intestinalis*, focusing on the ESCRT protein machinery from an evolutionary and  
341 molecular cell biological perspective. We show that the reduced ESCRT complement is  
342 the product of an evolutionary process that spans the shift from free-living to a parasitic  
343 state and includes *Giardia* assemblage-specific losses. We also report on previously  
344 unidentified ESCRT machinery and unidentified sites of ESCRT location in *Giardia*,  
345 opening novel avenues for investigation.

346

347 ***Gradual reductive evolution of ESCRTs and MVBs in the Fornicata***

348 Based on the lifestyles of the basally paraphyletic assemblage of CLOs, including  
349 *Carpediemonas*, the ancestor of Fornicata was likely a free-living anaerobic flagellate  
350 (Leger et. al., 2017). In these conditions, membrane trafficking machinery would be  
351 expected to play essential roles in phagotrophy, material exchange, osmoregulation, and  
352 intracellular homeostasis. From our analysis, this ancestor appears to have possessed a  
353 relatively complete complement of ESCRT machinery as compared with the deduced  
354 complement in the LECA. That said, there were likely some component losses that had  
355 already taken place (Figure 9), including the CHMP7 SNF7 C-terminus normally required  
356 for association with the ESCRT-III VPS32. While it is technically possible that “true”  
357 orthologs of these proteins may be encoded in the not-yet sequenced genomes of CLOs,  
358 given that the pattern remains consistent across 14 different sampling points, it is much  
359 more likely for an ancestral loss to have occurred in the ancestor of fornicates, rather than  
360 multiple instances of unexpressed protein or independent losses.

361 Loss in the SNF7 domain of CHMP7 may functionally relate to the other deduced  
362 loss observed in all free-living fornicates, that of a canonical VPS32 protein. By contrast,  
363 the transition to parasitism appears to have happened by the time of the diplomonad  
364 common ancestor. Concurrent with this are losses of VPS28, VPS60, VTA1 and possibly  
365 VPS37 (Figures 1 and 9). These are correlated, though not necessarily causally  
366 associated, with this transition. Notably, however, VPS23 is retained in some  
367 diplomonads and is characterized by the presence of a UEV domain which is required for  
368 interaction with cargo tagged with Ubiquitin for targeted lysosomal degradation. Lineages  
369 such as *Tetrahymena*, *Entamoeba*, and *Monocercomonoides* conserving only the VPS23  
370 from ESCRT-I appear to be capable of forming functional (or at least morphologically  
371 identifiable) multivesicular bodies (Cole et. al., 2015, Okada et. al., 2006, Karnkowska et.  
372 al., 2019). In turn, this allows us to predict that all fornicate lineages possessing ESCRT-  
373 I VPS23, including the diplomonads *S. salmonicida* and *Trepomonas* sp. PC1, may also  
374 possess bona fide MVBs.

375 In the common ancestor of *Giardia* itself, we observed loss in all ubiquitin binding  
376 components and domains. Collectively, these include TOM1-esc, ESCRT-I, and VPS36  
377 GRAM and NZF domains. We speculate that the observed lack of canonical MVB

378 morphology in *Giardia intestinalis* specifically corresponds to losses within these  
379 components. Instead, we propose that the existing repertoire of *Giardia* ESCRT  
380 machinery has an altered role at the *Giardia* specific late endolysosomal organelle, the  
381 PVs. Notably, we also observed variability between the different *Giardia* genomes in  
382 some ESCRT-III and -IIIA components indicating that there is inter-strain variability in the  
383 membrane-trafficking complement worthy of further investigation.

384 PV vesicle-like contents have been recently observed in *Giardia* (Midlej et al.,  
385 2019; Moyano et al., 2019). However, although *Giardia* may secrete non-exosomal and  
386 non-MVB-derived extracellular vesicles, the absence of key ESCRT machinery (e.g.  
387 TOM1-esc, ESCRT-I, and VPS36 GRAM domain), along with a lack of specific exosomal  
388 markers and limited proteomics data (Ma'ayeh et al., 2017; Coelho et al., 2018) keeps  
389 the status of PV-associated vesicles in some doubt. An alternate interpretation is the PVs  
390 as a form of reduced and functionally limited MVB-like compartments in a similarly  
391 reduced *Giardia* endomembrane system which evolved via a process of merging  
392 organelle identity and distribution of endocytic function. Although PVs may not have a  
393 direct organellar homologue, it is still meaningful to understand which processes have  
394 been distributed to which organelles in this re-organization.

395

### 396 ***ESCRT promiscuity at Giardia PVs, ER, and mitosomes***

397 Previous investigations of the *Giardia* ESCRT-IIIA components determined a  
398 possible role for this complex at the endolysosomal peripheral vacuoles (Dutta et al.,  
399 2015, Saha et al., 2018). While ESCRT-IIIA components VPS4 and VPS46 are  
400 universally conserved in all eukaryotes, ESCRT-II is not (Leung et al., 2008). Therefore,  
401 we aimed to investigate the role of this protein complex that is usually required for bridging  
402 an existing ESCRT-I and ESCRT-III in the multivesicular body pathway and how *Giardia*  
403 may be utilizing it in the absence of ESCRT-I.

404 The imaging data and signal overlap analyses performed with tagged reporters for  
405 both *GVPS25* and *GVPS36* and fluorescent dextran as a soluble PV lumen marker  
406 support a PV association for both ESCRT components. The link between ESCRTs and  
407 the endocytic pathway and PVs is further corroborated by cross-referencing previously  
408 published coIP datasets derived from PV-associated endocytic components. This



409 highlights the presence of ESCRT proteins in these PV-centric interactomes (Cernikova  
410 et. al., 2020, Zumthor et. al., 2016). Tagged reporters for  $\alpha$  and  $\beta$  subunits of AP2  
411 collectively immunoprecipitated ESCRT components *GVPS36B*, *GVPS36A*, *GVPS4A*,  
412 *GVPS4B*, *GiIST1*, *GVPS24A* and the three *GVPS31* paralogs (Zumthor et. al., 2016).  
413 *Giardia*'s first characterized dynamin-related protein pulled down ESCRT-III A VPS46B,  
414 VPS31A and VPS31C. *Giardia* Clathrin heavy and putative light chains' interactomes  
415 (Zumthor et al., 2016), similar to interactomes for the predicted PH-domain carrying PV-  
416 associated *GiNECAP1* protein (Cernikova et. al., 2020), include ESCRT-III A subfamily  
417 components *GVPS4A*, *GVPS4B* and the three paralogs of *GVPS31*. This wealth of  
418 previously-reported targeted proteomics data points to a clear association of *Giardia*  
419 ESCRT components to PVs, further strengthening these organelles' status as functionally  
420 reduced and non-motile endo-lysosomal compartments. A clear association between  
421 ESCRT components and the ER also emerged from our investigations and is in line with  
422 reports for ESCRT-III participation in budding vesicles from the ER (Mast et al., 2018)  
423 and for CHMP7 deposition at the perinuclear envelope (Olmos et al., 2016).

424 The most surprising association reported here is between CHMP7 and the  
425 mitochondrial marker *IscU*, from which we infer a role for this ESCRT component at  
426 mitosomes. Notably this inference is corroborated by the presence of *GiCHMP7* and  
427 ESCRT-III A components *GVPS4B*, *GVPS46B* and *GVPS31* in the interactome of  
428 mitosome-localized *GiMOMTiP1* protein, a main interacting partner of *GiTom40* (Rout et  
429 al., 2016). Recent reports point to novel links between ESCRTs, mitochondrial  
430 membranes (Richardson et. al., 2014) and mitophagy (Hammerling et. al., 2017; Zhen et.  
431 al., 2017, Anding et. al., 2018). Therefore, although ESCRTs have been associated to  
432 mitochondria, to our knowledge this is the first report to show an association to  
433 mitochondria-related organelles, representing a novel facet of MRO biology that should  
434 be explored in *Giardia* and in other MRO-possessing organisms.

435 Notably, the co-localization co-efficients that we observed for the various ESCRT  
436 components told a consistent, if not entirely straight-forward story. In all cases, we  
437 observed low co-efficients for overall signal overlap and degree of overlap between the  
438 ESCRT component and with discrete organellar markers, but high overlap between the  
439 organellar markers and the component. The overall overlap quantification between



440 ESCRT components, especially Vps25 and Vps20L or Vps36 however, were higher  
441 indicating that their signals were consistent. Together this tells a story of ESCRT  
442 localization at multiple locations, beyond the PV to the ER and even the mitosome in the  
443 case of CHMP7.

444

### 445 ***A comprehensive appreciation of ESCRT evolution and distribution in Giardia*** 446 ***intestinalis***

447 Definition of *Giardia* ESCRTs subcellular localizations combined with rigorous  
448 phylogenetic analyses point to streamlining and loss of canonical MVB morphology within  
449 Fornicata, mirrored by the selective loss of ESCRT-I, of which *Giardia* is a notable  
450 example. In the *Giardia* lineage, we observe duplications in the ESCRT-IIIA machinery  
451 with paralogs (Figure 9) which may compensate for ESCRT-I and -III losses while, in  
452 combination with remaining ESCRT components, still functioning at PVs. We further  
453 observe deep adaptation in *Giardia*'s ESCRT pathway by ESCRT-III components such  
454 as the CHMP7 apparently not associating within the endocytic pathway as first proposed  
455 (Horii et al., 2006).

456 In comparison to ESCRT machinery in characterized model organisms (Figure  
457 S1), we observe localization of ESCRT-II together with previously analyzed ESCRT-IIIA  
458 VPS46 and VPS4 components in close proximity to PVs and ER, while ESCRT-III CHMP7  
459 and VPS20L seem to localize almost exclusively in regions overlapping with the ER, with  
460 additional unknown roles for ESCRT-III CHMP7 at mitosomes.

461 *Giardia* ESCRT-III's association to the ER and to mitosomes presents a complex  
462 landscape of novel membrane remodelling sites while maintaining PVs as reduced and  
463 simplified MVB-like compartments mostly by the action of ESCRT-II and ESCRT-IIIA  
464 subunits. Our collective data sheds light on a potential mode of action for ESCRT-II and  
465 ESCRT-IIIA at the PV membranes. We speculate that these subunits likely associate to  
466 the PV outer membrane from a cytosolic pool and perform membrane deformation, as  
467 characteristic of other eukaryotic ESCRT subunits. Contacts sites between ER and PVs  
468 have been previously documented (Zumthor et. al. 2016) and could additionally be  
469 mediated by ESCRTs, allowing protein recycling down the endocytic and secretory  
470 pathway.

## 471 **CONCLUSIONS**

472 We have traced the evolutionary trajectories of ESCRTs within the Fornicata,  
473 observing a slow streamlining of the ESCRT machinery across the transition to  
474 parasitism, with losses predating, concurrent with and post-dating. Several groups have  
475 recently reported on a broader set of ESCRT functions in the eukaryotic cell than  
476 previously understood. In *Giardia*, ESCRTs have been primarily previously reported at  
477 the PV. Additionally, we have shown ESCRT association to other membrane locations  
478 such as the ER and mitosome surface, suggesting this machinery may act more  
479 extensively at multiple organelles in *Giardia* than expected. Future functional studies  
480 should build on this comprehensive report to determine if *Giardia's* status as a highly-  
481 diverged non-canonical eukaryote may be a notable exception when it comes to ESCRT  
482 function and complement.

483

## 484 **MATERIALS AND METHODS**

### 485 ***Taxa Studied***

486 The previously-published draft genomes of *Kipferlia bialata* (Tanifuji et al., 2018), genome  
487 of *Spironucleus salmonicida* (Xu et al., 2014), transcriptome of *Trepomonas* sp. PC1 (Xu  
488 et al., 2016), genome of *Giardia intestinalis* Assemblage AI, isolate AWB (Morrison et al.,  
489 2007), genome of *Giardia intestinalis* Assemblage AII, isolate DH (Adam et al., 2013),  
490 draft genome of *Giardia intestinalis* Assemblage B, isolate GS (Franzen et al., 2009),  
491 genome of *Giardia intestinalis* Assemblage B, isolate GS-B (Adam et al., 2013), and  
492 genome of *Giardia intestinalis* Assemblage E, isolate P15 (Jerlström-Hultqvist et al.,  
493 2010) were obtained from GiardiaDB and National Centre for Biotechnology Information  
494 (NCBI). Latest assemblies were used in each case.

495

### 496 ***Translation of Carpediemonas-like organism nucleotide transcriptomes***

497 Nucleotide transcriptomes of *Carpediemonas membranifera* and five *Carpediemonas*-like  
498 organisms (CLOs), *Aduncisulcus paluster*, *Ergobibamus cyprinoides*, *Dysnectes brevis*,  
499 *Chilomastix cuspidata*, and *Chilomastix caulleryi* were obtained from Dryad Repository  
500 ([doi 10.5061/dryad.34qd7](https://doi.org/10.5061/dryad.34qd7)) (Leger et. al, 2017) and translated using ab initio gene

501 prediction program, GeneMarkS-T under the default parameters (Tang, Lomsadze,  
502 Borodovsky, 2015).

503

#### 504 ***Comparative genomics and homology searching***

505 Query protein sequences for individual subunits from each ESCRT sub-complex from  
506 various pan-eukaryotic representatives were obtained and aligned using MUSCLE v3.  
507 8.31 (Edgar, 2004) (Supplementary Table 1). Resulting alignments were used to generate  
508 Hidden Markov Models using the hmmbuild option available through the HMMER 3.1.b1  
509 package and HMMer searches into all Fornicata genomes and transcriptomes using the  
510 hmmsearch tool with an e-value cutoff set to 0.01 (Eddy, 1998). Non-redundant forward  
511 hits were deemed positive if BLASTp reciprocally retrieved the correct ortholog in *Homo*  
512 *sapiens* protein database with an e-value > 0.05 and were two-fold higher in e-value than  
513 the next best hit. Reciprocal hits were extracted and sorted using an in-house Perl script.

514 Additional analyses of hits that failed to retrieve any reciprocal hits were analysed  
515 by BLASTp in the NCBI non-redundant database. Additional orthology assessment was  
516 carried out using the HHPRED suite for an HMM-HMM profile comparison and predicted  
517 secondary structure homology comparison with proteins deposited in the Protein Data  
518 Bank (Berman et al., 2008). In order to rule out any false negatives, additional translated  
519 nucleotide (tBLASTn) searches were carried out in the Fornicata nuclear scaffolds for  
520 components that remained unidentified in HMMER searches. In cases where diplomonad  
521 sequences were unidentified due to extreme sequence divergence, identified  
522 *Carpediemonas membranifera* and CLO ESCRT orthologs were used to search the  
523 diplomonad predicted protein databases by subsequently adding these sequences into  
524 the previously generated HMM profile to build a new HMM matrix. Exhaustive BLASTp  
525 and tBLASTn analyses were also performed using *Carpediemonas membranifera* and  
526 CLO sequences in the nuclear scaffolds of all diplomonads. All Fornicata ESCRT  
527 orthologs identified by this method were subject to domain analyses using Conserved  
528 Domain Database (CDD) with an e-value cut-off first set at 0.01 and then at 1.0 to detect  
529 for any highly diverged domains (<https://www.ncbi.nlm.nih.gov>). All confirmed hits are  
530 listed in Supplementary Table 2.

531 CHMP7 structural analyses was carried out using HHPRED as described above  
532 for select pan-eukaryotic orthologs as well as the *ab initio* structural prediction tool  
533 iTASSER for protein threading and secondary structure prediction (Roy et al., 2010).  
534 HHPRED results are summarized in Supplementary Table 3.

535

### 536 ***Phylogenetic analyses of the ESCRT-III and ESCRT-III A SNF7 family proteins***

537 Phylogenetic analyses of the evolutionarily paralogous SNF7 family proteins  
538 belonging to ESCRT-III and ESCRT-III A sub-complexes was carried out using Bayesian  
539 and maximum likelihood approaches (Leung et al., 2008). Identified *Carpodemonas*  
540 *membranifera* ESCRT genes belonging to the SNF7 family were used as a landmark  
541 representative (VPS2, VPS24, VPS20, VPS32, VPS46, and VPS60) and were aligned to  
542 a pan-eukaryotic backbone containing characterized SNF7 proteins for classification into  
543 specific protein families backbone alignment containing pan-eukaryotic sequences as  
544 resolved and published by Leung et al using the profile option in MUSCLE v3.8.31 (Leung  
545 et al., 2008, Edgar, 2004). Alignments were visualized in Mesquite v3.5 (Maddison and  
546 Maddison, 2018) and manually adjusted to remove gaps and regions lacking homology.  
547 Upon classification of the *Carpodemonas* sequences, a metamonad-specific  
548 phylogenetic analysis was carried out for the classification of identified *Giardia* and  
549 diplomonad SNF7 sequences using the same process as described above. An additional  
550 set of phylogenetic analysis was repeated using only ESCRT-III and -III A components,  
551 VPS2, VPS24, and VPS46 specific tree and VPS20, VPS32, and VPS60 specific tree.

552 Maximum likelihood approaches using non-parametric and ultrafast bootstrapping  
553 was performed using RAxML-HPC2 on XSEDE v8.2.10 and IQTREE, respectively  
554 (Stamatakis, 2014, Nguyen et al., 2015). For RAxML analyses, protein model testing was  
555 performed using ProtTest v3.4.2 (Darriba et al., 2011). In all cases, LG + F +  $\Gamma$  model was  
556 used. 100 non-parametric bootstraps with the default tree faster hill climbing method (-f  
557 b, -b, -N 100) was carried out. A consensus tree was obtained using Consense program  
558 available through the Phylip v3.66 package  
559 (<http://evolution.genetics.washington.edu/phylip.html>) (Felsenstein, 1989). IQTREE best  
560 protein model selections were determined using the in-built ModelFinder package  
561 (Kalyaanamoorthy et al., 2017). In all cases, LG+F+G4 was determined to be the best-fit

562 model according to the Bayesian Information Criterion. Ultrafast bootstrapping with IQ-  
563 TREE v. 1.6.5 were performed using 1000 pseudoreplicates (Nguyen et al., 2015).  
564 Bayesian inference was carried out using MRBAYES on XSEDE v3.2.6 with 10 million  
565 Markov Chain Monte Carlo generations under a mixed amino acid model with number of  
566 gamma rate categories set to 4 (Huelsenbeck and Ronquist, 2001). Sampling frequency  
567 was set to occur every 1000 generations and burnin of 0.25 to discard the first 25% of  
568 samples from the cold chain. Tree convergence was ensured when average standard  
569 deviation of split frequency values fell below 0.01. Random seed value of 12345 was  
570 chosen for all phylogenetic analyses. Non-parametric and ultrafast bootstraps obtained  
571 from RAxML and IQTREE analyses were overlaid onto the MRBAYES tree topologies  
572 with posterior probabilities. RAxML and MrBAYES analyses were performed on CIPRES  
573 portal (<http://www.phylo.org/index.php>) while the IQTREE package v1.6.5 was installed  
574 and run locally (Miller et al., 2015). All trees were visualized and rooted in FigTree and  
575 annotations were carried out in Adobe Illustrator CS4. All masked and trimmed  
576 alignments available upon request.

577

### 578 ***Giardia cell culture and transfection***

579 *Giardia intestinalis* strain AWB (clone C6; ATCC catalog number 50803) trophozoites  
580 were grown using standard methods as described in Morf et. al. (Morf et al., 2010).  
581 Episomally- transfected parasites were obtained via electroporation of the circular pPacV-  
582 Integ-based plasmid prepared in *E. coli* as previously (Zumthor et. al., 2016).  
583 Transfectants were selected using Puromycin (final conc. 50 µg ml<sup>-1</sup>; InvivoGen).  
584 Transgenic lines were generated and analyzed at least thrice as soon as at least 20  
585 million transgenic cells could be harvested *i.e.* ca. 1.5 weeks post-transfection. Based on  
586 microscopy analyses of immunofluorescence assays to detect reporter levels, 85-92% of  
587 cells expressed their respective transgene(s) (Supplementary Figure 4).

588

### 589 ***Construction of expression vectors***

590 Oligonucleotide sequences for construct generation are listed in Supplementary Table 4.  
591 Open reading frames of interest were cloned in the pPacV-Integ vector under control of  
592 their putative endogenous promoters. Putative endogenous promoters were derived

593 150bps upstream of the predicted translation start codon. ORFs were cloned in a modified  
594 PAC vector (Wampfler et al., 2014, Zumthor et. al., 2016, and Cernikova et. al., 2020).

595

### 596 ***Immunofluorescence Assays***

597 Chemically fixed cells for subcellular recombinant protein localization were prepared as  
598 previously described (Konrad, Spycher, and Hehl, 2010). HA-epitope tagged recombinant  
599 proteins were detected using a rat-derived monoclonal anti-HA antibody (dilution 1:200,  
600 Roche) followed by a secondary anti-rat antibody coupled to AlexaFluor 594 fluorophores  
601 (dilution 1:200, Invitrogen). For co-localization experiments with ER or mitochondrial  
602 markers, samples were incubated with either a mouse-derived anti-GiPDI2 (Stefanic et.  
603 al. 2006) or a mouse-derived anti-GilscU (Rout et. al. 2016) primary antibodies both at a  
604 dilution of 1:1000, followed by incubation with anti-mouse antibodies coupled to  
605 AlexaFluor 488 fluorophores (dilution 1:200, Invitrogen). For the labelling of the V5  
606 epitope, we used anti-V5 primary antibody (1:1000; Thermofisher) followed by anti-mouse  
607 antibodies coupled to AlexaFluor 594 fluorophores (dilution 1:200, Invitrogen). Samples  
608 were embedded in Vectashield (VectorLabs) or Prolong Diamond Mounting medium  
609 (Invitrogen) containing 4',6-diamidino-2-phenylindole (DAPI) for nuclear staining.

610

### 611 ***Fluid phase marker uptake***

612 Dextran uptake assays were performed as described in (Gaechter et al. 2008; Zumthor  
613 et al. 2016) using Dextran 10kDa TexasRed at 2mg/mL (Invitrogen). Immunostaining was  
614 performed as described above with the exception of using only 0.05% Triton-X100  
615 (Sigma) in 2% BSA (Sigma) for permeabilization, to prevent leakage and loss of Dextran  
616 signal.

617

### 618 ***Microscopy and Image Analysis***

619 Imaging was performed in an inverted Confocal Laser Scanning Microscope Leica SP8  
620 using appropriate parameters. Confocal images were subsequently deconvolved using  
621 Huygens Professional (<https://svi.nl/Huygens-Professional>) and analysed using  
622 Fiji/ImageJ (Schindelin et al. 2012). For co-localization analysis the coloc2 Fiji/imageJ  
623 plugin was used. For this, automatic background subtraction was performed in Fiji/imageJ



624 and 100 Costes iterations were performed (Costes et al.,2004). Three-dimensional  
625 analysis and videos were performed in Imaris version 9.5.0 (Bitplane, AG)  
626 (Supplementary Videos 1-11). For statistical analysis of labelling signal overlap between  
627 ESCRT subunits and specified markers, a macro was developed in Fiji/ImageJ  
628 (Schindelin et al.,2012) (version 1.53d). This script has been made available through  
629 supplementary materials (Supplementary File 1). Briefly, each channel was thresholded  
630 via WEKA segmentation – a machine learning pipeline (Arganda-Carreras et al., 2017).  
631 The derived binary image is used as a mask for signal overlap on  $\geq 15$  cells per  
632 sample/line using the Fiji plugin coloc2 (Cosets et al., 2004).

633

### 634 ***Data Availability***

635 Masked and unmasked protein sequence alignments used for all phylogenetic analyses  
636 available upon request.

637

### 638 **ACKNOWLEDGMENTS**

639 All microscopy imaging and image analysis was performed with equipment provided by  
640 the Center of Microscopy and Image Analysis (ZMB) at the University of Zurich and the  
641 Microscopy Center (MIC) at the University of Bern. We thank members of the Dacks lab,  
642 Faso and Hehl groups for insightful discussions.

643

644 No conflicts of interest present.

645

646 SVP, RS, CF, DSL, AJR, ABH and JBD designed the studies. SVP, RS, EAB, and CDW  
647 performed the experiments. SVP, RS, DSL, CF, and JBD carried out data analyses. SVP,  
648 RS, CF, and JBD wrote the manuscript. All authors read and approved the final  
649 manuscript.

650

651

652

653

654



655 **FIGURE LEGENDS**

656

657 **Figure 1. Distribution of ESCRT components within Fornicata.** Coulson plot  
658 summary depicting ESCRT complement identified in Fornicata genomes and  
659 transcriptomes in comparison to pan-eukaryotic representatives. Filled sectors indicate  
660 subunits with solidified orthology determined using both comparative genomics and  
661 phylogenetics (numbers representing multiple paralogues). Light coloured sectors  
662 indicate ambiguous phylogenetic classification but confirmed reciprocal blast orthology.  
663 Taxa for which genomes were available and examined are indicated in plain text whereas  
664 transcriptomes are indicated with a superscript symbol. Additionally, parasitic lineages  
665 are indicated in burgundy. Of important note, only inferences regarding gene presence,  
666 not absences, can be made conclusively in the lineages for which only a transcriptome is  
667 available.

668

669 **Figure 2. Phylogenetic analysis of ESCRTs in Fornicata.** (A) Phylogenetic analyses  
670 of the ESCRTIII/IIIA SNF7 families in Fornicata. Identified ESCRTIII/IIIA SNF7  
671 components from the basal *Carpediemonas membranifera* as a landmark representative  
672 for Fornicata were subject to phylogenetic classification. Two of the identified SNF7  
673 sequences from *Carpediemonas membranifera* clustered clearly with VPS60 whereas the  
674 remainder neither strongly grouped with VPS20 or VPS32 and therefore were determined  
675 to be VPS20L proteins in all tree topologies. *Carpediemonas membranifera* was also  
676 determined to have VPS2, VPS24 and VP46 with strong backbone clade support for two  
677 paralogs of VPS24 (1.0/100/100) and three paralogs of VPS46 (1.0/100/100). (B) A  
678 Fornicata-specific tree with well characterized Discoba and metamonad representatives.  
679 *Monocercomonoides exilis*, *Trichomonas vaginalis*, and *Naegleria gruberi* as well as  
680 newly characterized sequences from *Carpediemonas membranifera* were used to classify  
681 SNF7 components in all CLOs and diplomonads. Similar to *Carpediemonas*, no clear  
682 grouping of SNF7 sequences from CLOs within the VPS20 or VPS32 clade was observed  
683 and therefore were also classified as VPS20L. Only sequences from *Giardia* AWB, ADH,  
684 and EP15 formed a group within this clade and therefore were also determined to be  
685 VPS20L. VPS2 family proteins identified in the diplomonads grouped with both VPS24

686 and VPS46 with duplication event pointing in *Giardia* sp. VPS46 yielding two paralogues,  
687 VPS46A and VPS46B. An additional set of SNF7 family proteins from *Giardia* AWB, ADH,  
688 and EP15 grouped with excavate and CLO VPS24 proteins therefore were determined to  
689 be VPS24-like proteins. However, an additional set of SNF7 proteins from all *Giardia*  
690 lineages formed a separate sister clade and therefore also termed to be VPS24. Trees  
691 were rooted between the VPS20/32/60 and VPS2/24/46 as previously determined by  
692 Leung et al., (2008).

693

694 **Figure 3. Characterization of G/VPS25-HA subcellular location.** (A) Trophozoite cell  
695 periphery and cytosol. (I) Ventral and (II) middle optical slice of transgenic *Giardia*  
696 trophozoite expressing epitope-tagged G/VPS25-HA (green). All images were obtained  
697 using Confocal Laser Scanning Microscopy. All scale bars: 5  $\mu\text{m}$ . (B) PVs. (I)  
698 Immunofluorescence-assay of transgenic *Giardia* trophozoite labelled for epitope-tagged  
699 G/VPS25-HA (green) and Dextran-TexasRed (magenta). (II) Distribution of co-  
700 localization parameters for G/VPS25-HA and Dextran-TexasRed labeling from  $\geq 15$   
701 analysed cells. Mean values for each parameter are indicated. (III) Signal overlap  
702 analysis and co-localization coefficients calculated for all slices of the sample either for the whole  
703 cell or ROI. Scale bars: composite 5  $\mu\text{m}$  and ROI 1  $\mu\text{m}$ . All images were obtained using  
704 Confocal Laser Scanning Microscopy.

705

706 **Figure 4. Characterization of G/VPS36A-HA subcellular location.** (A) Cell periphery  
707 and cytosol. (I) Ventral and (II) dorsal optical slices of transgenic *Giardia* trophozoite  
708 expressing G/VPS36A-HA. All images were obtained using Confocal Laser Scanning  
709 Microscopy. All scale bars: 5  $\mu\text{m}$ . (B) PVs. (I) Immunofluorescence-assay of transgenic  
710 *Giardia* trophozoites labelled for G/VPS36-HA (green) after incubation with Dextran-TxR  
711 (magenta). (II) Distribution of co-localization parameters for G/VPS36-HA and Dextran-  
712 TexasRed labeling from  $\geq 15$  analysed cells. Mean values for each parameter are  
713 indicated. (III) Signal overlap analysis and co-localization coefficients calculated for all  
714 slices of the sample either for the whole cell or ROI. Scale bars: composite 5  $\mu\text{m}$  and ROI  
715 1  $\mu\text{m}$ . All images were obtained using Confocal Laser Scanning Microscopy.

716

717

718 **Figure 5. Co-labelling of *G*VPS25-HA, *G*VPS36A-HA and *G*iHA-VPS20L with ER**  
719 **membrane marker *G*iPDI2.** (A) HA-*G*iVPS20L is found in the cytosol and punctate  
720 structures. Scale bars: 5  $\mu$ m. (B-D) Panels I: Co-labelling of PDI2 (magenta) in cells  
721 expressing either (B) *G*VPS25-HA (green), (C) *G*VPS36A-HA (green) or (D) *G*iHA-  
722 VPS20L (green). (B-D) Panels II: Mean values from  $\geq 15$  analysed cells for each  
723 parameter are indicated. (B-D) Panels III: Signal overlap analysis and co-localization  
724 coefficients calculated for all slices of the sample either for the whole cell or ROI. Scale  
725 bars: composite 5  $\mu$ m and ROI 1  $\mu$ m. All images were obtained using Confocal Laser  
726 Scanning Microscopy.

727

728 **Figure 6. Co-expression of epitope-tagged *G*VPS25 with either *G*VPS20L or**  
729 ***G*VPS36.** Microscopy analysis of cells co-expressing *G*VPS25HA (green) with either (A)  
730 *G*VPS36A-V5 (magenta) or (B) *G*V5-VPS20L (magenta). Panels I: representative cell  
731 images and percentage of co-labeling. Panels II: Signal overlap analysis in both whole  
732 cells and regions of interest (ROI). Scale bars: (I) 10  $\mu$ m, (II whole cell) 5  $\mu$ m and (II-ROI)  
733 1  $\mu$ m. Panels III: Mean values from  $\geq 15$  analysed cells for each parameter are indicated.

734

735 **Figure 7. *Ab initio* homology based structural analysis of the CHMP7 N-terminus.**

736 (A) Homology-based protein structural analysis of the CHMP7 N-terminus from various  
737 pan-eukaryotic representatives carried out using iTASSER *ab initio* structural prediction  
738 program where considerable structural similarity between the ESCRTII-VPS25 and  
739 CHMP7 N-termini. (B) Proposed evolution as determined by homology searching,  
740 structural analyses, and phylogenetic analysis (Supplementary Figures S8-S11) of the  
741 pan-eukaryotic CHMP7 protein prior to the last eukaryotic common ancestor which  
742 consisted of an evolutionary fusion event between a pre-LECA ESCRTII-VPS25 and  
743 ESCRTIII/IIIA-SNF7 progenitor protein.

744

745 **Figure 8. Characterization of *G*iCHMP7 subcellular location.** (A) Immunofluorescence  
746 assays of HA-*G*iCHMP7-expressing cells yield a diffused punctate pattern with elements  
747 of perinuclear ER staining (arrowhead). Scale bars: 5  $\mu$ m. (B) (I) Co-labelling of HA-

748 *GiCHMP7* (magenta) -expressing cells with *GiPDI2* (green). (II) Distribution of co-  
749 localization parameters for *GiCHMP7*-HA and *GiPDI2* labeling from  $\geq 15$  analysed cells.  
750 Mean values for each parameter are indicated. (III) Signal overlap analysis for all slices  
751 of the sample either for the whole cell or ROI. (C) HA-*GiCHMP7* is associated to *Giardia*  
752 mitosomes. (I) Co-labelling of HA-*GiCHMP7* (magenta) -expressing cells with *GiIscU*  
753 (green). (II) Distribution of co-localization parameters for *GiCHMP7*-HA and *GiIscU*  
754 labeling from  $\geq 15$  analysed cells. Mean values for each parameter are indicated. (III)  
755 Signal overlap analysis for all slices of the sample either for the whole cell or ROI. Scale  
756 bar: composite 5  $\mu\text{m}$  and ROI 1  $\mu\text{m}$ . All images were obtained using Confocal Laser  
757 Scanning Microscopy.

758  
759 **Figure 9. Proposed ESCRT evolution in Fornicata.** Progenitor ESCRT complexes are  
760 present in Asgard archaea and duplications into the specific subunits is inferred to have  
761 occurred between the First Eukaryotic Common Ancestor and the Last Eukaryotic  
762 Common Ancestor which possessed a full complement of the ESCRT subunits. Proposed  
763 ESCRT losses in Fornicata inferred previously only using *Giardia intestinalis* (Leung et  
764 al., 2008; Saha et al. 2018) are transient with some losses potentially predating the Last  
765 Fornicata Common Ancestor. The most prominent of this being loss in CHMP7 c-terminus  
766 SNF7 domain and a canonical VPS32. Examination of diplomonad lineages, specifically  
767 genomic data, increases our confidence in additional losses also occurring with  
768 progression into parasitism most notable within the ESCRTI machinery with complete  
769 loss occurring in the *Giardia* common ancestor likely associated with a loss in the  
770 canonical MVB morphology. Speculative losses indicated as unfilled dotted arrows  
771 whereas instances of likely true gene absence depicted as solid filled arrows.

772  
773  
774  
775  
776  
777  
778

779 **REFERENCES**

- 780 1. Lanata, C. F., Fischer-walker, C. L., Olascoaga, A. C., Torres, C. X., Aryee, M.  
781 J..., & Black, R. E. (2013). Global Causes of Diarrheal Disease Mortality in  
782 Children <5 Years of Age : A Systematic Review. *PLoS ONE*, 8(9), e72788.  
783 <https://doi.org/10.1371/journal.pone.0072788>
- 784 2. Faso, C., & Hehl, A. B. (2011). Membrane trafficking and organelle biogenesis in  
785 *Giardia lamblia*: Use it or lose it. *International Journal for Parasitology*, 41(5), 471-  
786 80. <https://doi.org/10.1016/j.ijpara.2010.12.014>
- 787 3. Allain, T., & Buret, A. G. (2020). Pathogenesis and post-infectious complications  
788 in giardiasis. *Advances in parasitology*, 107, 173–199.  
789 <https://doi.org/10.1016/bs.apar.2019.12.001>
- 790 4. Faso, C., & Hehl, A. B. (2019). *A cytonaut ' s guide to protein trafficking in Giardia*  
791 *lamblia*. *Giardia and Giardiasis* (1st ed., Vol. 106). Elsevier Ltd.  
792 <https://doi.org/10.1016/bs.apar.2019.08.001>
- 793 5. Gargantini, P. R., Serradell, M., Ríos, D. N., Tenaglia, A. H., & Luján, H. D. (2016).  
794 Antigenic variation in the intestinal parasite *Giardia lamblia*. *Current opinion in*  
795 *microbiology*, 32, 52–58. <https://doi.org/10.1016/j.mib.2016.04.017>
- 796 6. Eckmann, L., Laurent, F., Langford, T. D., Hetsko, M. L., Smith, J. R., Kagnoff, M.  
797 F., & Gillin, F. D. (2000). Nitric oxide production by human intestinal epithelial cells  
798 and competition for arginine as potential determinants of host defense against the  
799 lumen-dwelling pathogen *Giardia lamblia*. *Journal of immunology (Baltimore, Md.*  
800 *: 1950)*, 164(3), 1478–1487. <https://doi.org/10.4049/jimmunol.164.3.1478>
- 801 7. Stadelmann, B., Merino, M. C., Persson, L., & Svärd, S. G. (2012). Arginine  
802 consumption by the intestinal parasite *Giardia intestinalis* reduces proliferation of  
803 intestinal epithelial cells. *PloS one*, 7(9), e45325.  
804 <https://doi.org/10.1371/journal.pone.0045325>
- 805 8. Stefanic, S., Morf, L., Kulangara, C., Regos, A., Sonda, S., ..., Hehl, A.B. (2009).  
806 Neogenesis and maturation of transient Golgi-like cisternae in a simple eukaryote.  
807 *Journal of Cell Science*, 122, 2846-2856
- 808 9. Sheffield, H. G., & Bjorvatn, B. (1977). Ultrastructure of the Cyst of *Giardia*  
809 *Lamblia*. *The American Journal of Tropical Medicine and Hygiene*, 26(1), 23–30.
- 810 10. Abodeely, M., Dubois, K. N., Hehl, A., Stefanic, S., Sajid, M., Desouza, W., ...  
811 McKerrow, J. H. (2009). A contiguous compartment functions as endoplasmic  
812 reticulum and endosome/lysosome in *Giardia lamblia*. *Eukaryotic Cell*, 8(11),  
813 1665-76. <https://doi.org/10.1128/EC.00123-09>
- 814 11. Elias, M., Brighthouse, A., Gabernet-castello, C., Field, M. C., & Dacks, J. B. (2012).  
815 Sculpting the endomembrane system in deep time : high resolution phylogenetics  
816 of Rab GTPases, *Journal of Cell Science*, 125(Pt 10), 2500–2508.  
817 <https://doi.org/10.1242/jcs.101378>
- 818 12. Schlacht, A., Mowbrey, K., Elias, M., Kahn, R. A., & Dacks, J. B. (2013). Ancient  
819 Complexity, Opisthokont Plasticity, and Discovery of the 11th Subfamily of Arf GAP  
820 Proteins. *Traffic*, 14(6), 636–649. <https://doi.org/10.1111/tra.12063>
- 821 13. Hirst, J., Schlacht, A., Norcott, J. P., Traynor, D., Bloomfield, G., Antrobus, R., ...  
822 Robinson, M. S. (2014). Characterization of TSET, an ancient and widespread  
823 membrane trafficking complex. *ELife*, 3, e02866.  
824 <https://doi.org/10.7554/eLife.02866>



- 825 14. Venkatesh, D., Boehm, C., Barlow, L. D., Nankissoor, N. N., O'Reilly, A., Kelly, S.,  
826 ... Field, M. C. (2017). Evolution of the endomembrane systems of  
827 trypanosomatids – conservation and specialisation. *Journal of Cell Science*,  
828 130(8), 1421–1434. <https://doi.org/10.1242/jcs.197640>
- 829 15. Herman, E. K., Ali, M., Field, M. C., & Dacks, J. B. (2018). Regulation of early  
830 endosomes across eukaryotes: Evolution and functional homology of VPS9  
831 proteins, *Traffic*, 19(7), 546–563. <https://doi.org/10.1111/tra.12570>
- 832 16. Pipaliya, S. V., Schlacht, A., Klinger, C. M., Kahn, R. A., & Dacks, J. (2019). Ancient  
833 complement and lineage-specific evolution of the Sec7 ARF GEF proteins in  
834 eukaryotes, *Molecular Biology of the Cell*, 30(15), 1846–1863.  
835 <https://doi.org/10.1091/mbc.E19-01-0073>
- 836 17. Zumthor, J. P., Cernikova, L., Rout, S., Kaech, A., Faso, C., & Hehl, A. B. (2016).  
837 Static Clathrin Assemblies at the Peripheral Vacuole—Plasma Membrane  
838 Interface of the Parasitic Protozoan *Giardia lamblia*. *PLoS Pathogens*, 12(7),  
839 e1005756. <https://doi.org/10.1371/journal.ppat.1005756>
- 840 18. Cernikova, L., Faso, C., & Hehl, A. B. (2020). Phosphoinositide-binding proteins  
841 mark, shape and functionally modulate highly-diverged endocytic compartments in  
842 the parasitic protist *Giardia lamblia*. *PLoS pathogens*, 16(2), e1008317.  
843 <https://doi.org/10.1371/journal.ppat.1008317>
- 844 19. Raiborg, C., & Stenmark, H. (2009). The ESCRT machinery in endosomal sorting  
845 of ubiquitylated membrane proteins. *Nature*, 458(7237), 445–452.  
846 <https://doi.org/10.1038/nature07961>
- 847 20. Vietri, M., Radulovic, M., & Stenmark, H. (2019). The many functions of ESCRTs.  
848 *Nature Reviews Molecular Cell Biology*, 21, 25–42. [https://doi.org/10.1038/s41580-](https://doi.org/10.1038/s41580-019-0177-4)  
849 [019-0177-4](https://doi.org/10.1038/s41580-019-0177-4)
- 850 21. Hurley, J. H. (2015). ESCRTs are everywhere. *The EMBO Journal*, 34(19), 2398–  
851 2407. <https://doi.org/10.15252/embj.201592484>
- 852 22. Leung, K. F., Dacks, J. B., & Field, M. C. (2008). Evolution of the multivesicular  
853 body ESCRT machinery; retention across the eukaryotic lineage. *Traffic*, 9(10),  
854 1698–716. <https://doi.org/10.1111/j.1600-0854.2008.00797.x>
- 855 23. Saha, N., Dutta, S., Datta, S. P., & Sarkar, S. (2018). The minimal ESCRT  
856 machinery of *Giardia lamblia* has altered inter-subunit interactions within the  
857 ESCRT-II and ESCRT-III complexes. *European Journal of Cell Biology*.  
858 <http://doi.org/10.1016/j.ejcb.2017.11.004>
- 859 24. Spang, A., Saw, J. H., Jørgensen, S. L., Zaremba-niedzwiedzka, K., Martijn, J.,  
860 Lind, A. E., ... Ettema, T. J. G. (2015). Complex archaea that bridge the gap  
861 between prokaryotes and eukaryotes, *Nature*, 521(7551), 173–179.  
862 <https://doi.org/10.1038/nature14447>
- 863 25. Seitz, K. W., Dombrowski, N., Eme, L., Spang, A., Lombard, J., Sieber, J. R., ...  
864 Baker, B. J. (2019). Asgard archaea capable of anaerobic hydrocarbon cycling.  
865 *Nature Communications*, 10(1), 1822. [https://doi.org/10.1038/s41467-019-09364-](https://doi.org/10.1038/s41467-019-09364-x)  
866 [x](https://doi.org/10.1038/s41467-019-09364-x)
- 867 26. Takashita, K., Kolisko, M., Komatsuzaki, H., Yabuki, A., Inagaki, Y., ... Simpson,  
868 A.G.B. (2012). Multigene Phylogenies of Diverse *Carpodomonas*-like Organisms  
869 Identify the Closest Relatives of 'Amitochondriate' Diplomonads and  
870 Retortamonads. *Protist*, 163(3), 344–355

- 871 27. Yang, Z., Vild, C., Ju, J., Zhang, X., Liu, J., Shen, J., ... Xu, Z. (2012). Structural  
872 basis of molecular recognition between ESCRT-III-like protein VPS60 and AAA-  
873 ATPase regulator Vta1 in the multivesicular body pathway. *Journal of Biological*  
874 *Chemistry*, 287(52), 43899-908. <http://doi.org/10.1074/jbc.M112.390724>
- 875 28. Gill, D. J., Teo, H., Sun, J., Perisic, O., Veprintsev, D. B., Emr, S. D., & Williams,  
876 R. L. (2007). Structural insight into the ESCRT-I/II link and its role in MVB  
877 trafficking. *EMBO Journal*, 26(2), 600–612.  
878 <http://doi.org/10.1038/sj.emboj.7601501>
- 879 29. Tang, S., Buchkovich, N.J., Henne, W.M., Banjade, S., Kim, Y.J., & Emr, S. D.  
880 (2016). ESCRT-III activation by parallel action of ESCRT-I/II and ESCRT-0/Bro1  
881 during MVB biogenesis. *Elife*, 13 (5), e15507
- 882 30. Miras, S. L., Merino, M. C., Gottig, N., Rópolo, A. S., & Touz, M. C. (2013). The  
883 giardial VPS35 retromer subunit is necessary for multimeric complex assembly  
884 and interaction with the vacuolar protein sorting receptor. *Biochimica et Biophysica*  
885 *Acta - Molecular Cell Research*, 1833(12), 2628–2638.  
886 <http://doi.org/10.1016/j.bbamcr.2013.06.015>
- 887 31. Hardin, W. R., Li, R., Xu, J., Shelton, A. M., Alas, G. C. M., Minin, V. N., & Paredez,  
888 A. R. (2017). Myosin-independent cytokinesis in Giardia utilizes flagella to  
889 coordinate force generation and direct membrane trafficking. *Proceedings of the*  
890 *National Academy of Sciences of the United States of America*, 114(29), E5854–  
891 E5863. <http://doi.org/10.1073/pnas.1705096114>
- 892 32. Klinger, C.M., Klute, M.J., & Dacks, J.B. (2013). Comparative genomic analysis of  
893 multi-subunit tethering complexes demonstrates an ancient pan-eukaryotic  
894 complement and sculpting in Apicomplexa. *PLoS One*, e76278.
- 895 33. Balderhaar, H. J. k., & Ungermann, C. (2013). CORVET and HOPS tethering  
896 complexes - coordinators of endosome and lysosome fusion. *Journal of Cell*  
897 *Science*, 126(6), 1307-1316. <http://doi.org/10.1242/jcs.107805>
- 898 34. Cernikova, L., Faso, C., & Hehl, A. B. (2019). Roles of Phosphoinositides and Their  
899 binding Proteins in Parasitic Protozoa. *Trends in Parasitology*, 35(12), 996–1008.  
900 <http://doi.org/10.1016/j.pt.2019.08.008>
- 901 35. Gaullier, J. M., Ronning, E., Gillooly, D. J., & Stenmark, H. (2000). Interaction of  
902 the EEA1 FYVE finger with phosphatidylinositol 3-phosphate and early  
903 endosomes. Role of conserved residues. *Journal of Biological Chemistry*, 275(32),  
904 24595–24600. <http://doi.org/10.1074/jbc.M906554199>
- 905 36. Sinha, A., Mandal, S., Banerjee, S., Ghosh, A., Ganguly, S., Sil, A. K., & Sarkar,  
906 S. (2011). Identification and characterization of a FYVE domain from the early  
907 diverging eukaryote Giardia lamblia. *Current Microbiology*, 62(4), 1179–1184.  
908 <http://doi.org/10.1007/s00284-010-9845-5>
- 909 37. Stefanic, S., Palm, D., Svärd, S. G., & Hehl, A. B. (2006). Organelle proteomics  
910 reveals cargo maturation mechanisms associated with Golgi-like encystation  
911 vesicles in the early-diverged protozoan Giardia lamblia. *Journal of Biological*  
912 *Chemistry*, 281(11), 7595–7604. <http://doi.org/10.1074/jbc.M510940200>
- 913 38. Horii, M., Shibata, H., Kobayashi, R., Katoh, K., ..., Maki, M. (2018). CHMP7, a  
914 novel ESCRT-III-related, associates with CHMP4b and functions in the endosomal  
915 sorting pathway. *Biochemical Journal*, 400 (1), 23-32



- 916 39. Bauer, I., Brune, T., Preiss, R., & Kölling, R. (2015). Evidence for a nonendosomal  
917 function of the *Saccharomyces cerevisiae* ESCRT-III-Like protein Chm7. *Genetics*,  
918 201(4), 1439–1452. <http://doi.org/10.1534/genetics.115.178939>
- 919 40. Gu, M., LaJoie, D., Chen, O. S., Von Appen, A., Ladinsky, M. S., Redd, M. J., ...  
920 Frost, A. (2017). LEM2 recruits CHMP7 for ESCRT-mediated nuclear envelope  
921 closure in fission yeast and human cells. *Proceedings of the National Academy of  
922 Sciences of the United States of America*, 114(11), E2166–E2175.  
923 <http://doi.org/10.1073/pnas.1613916114>
- 924 41. Regoes, A., Zourmanou, D., León-Avila, G., Van Der Giezen, M., Tovar, J., &  
925 Hehl, A. B. (2005). Protein import, replication, and inheritance of a vestigial  
926 mitochondrion. *Journal of Biological Chemistry*, 280(34), 30557–30563.  
927 <http://doi.org/10.1074/jbc.M500787200>
- 928 42. Rout, S., Zumthor, J. P., Schraner, E. M., Faso, C., & Hehl, A. B. (2016). An  
929 Interactome-Centered Protein Discovery Approach Reveals Novel Components  
930 Involved in Mitosome Function and Homeostasis in *Giardia lamblia*. *PLoS  
931 Pathogens*, 12(12), 1-32. <http://doi.org/10.1371/journal.ppat.1006036>
- 932 43. Dagley, M.J., Dolezal, P., Likic, V.A, Smid, O., Purcell, A.W., Buchanan, S.K.  
933 Tachezy, J., Lithgow, T. (2009). The protein import channel in the outer mitosomal  
934 membrane of *Giardia intestinalis*. *Molecular Biology and Evolution*, 26(9), 1941-7
- 935 44. Kolisko, M., Silberman, J.D., Cepicka, I., Yubuki, N., Takashita, K...Simpson,  
936 A.G.B. (2010). A wide diversity of previously undetected free-living relatives of  
937 diplomonads isolated from marine/saline habitats. *Environmental Microbiology*,  
938 12(10), 2700-2710
- 939 45. Okada, M., & Nozaki, T. (2006). New insights into molecular mechanisms of  
940 phagocytosis in *Entamoeba histolytica* by proteomic analysis. *Archives of Medical  
941 Research*, 37(2), 244–251. <http://doi.org/10.1016/j.arcmed.2005.10.003>
- 942 46. Cole, E. S., Giddings, T. H., Ozzello, C., Winey, M., O'toole, E., Orias, J., ...  
943 Aronsteina, T. (2015). Membrane dynamics at the nuclear exchange junction  
944 during early mating (one to four hours) in the ciliate *Tetrahymena thermophila*.  
945 *Eukaryotic Cell*, 14(2), 116–127. <http://doi.org/10.1128/EC.00164-14>
- 946 47. Karnkowska, A., Treitli, S. C., Brzoň, O., Novák, L., Vacek, V., Soukal, P., ...  
947 Battistuzzi, F. U. (2019). The Oxymonad Genome Displays Canonical Eukaryotic  
948 Complexity in the Absence of a Mitochondrion. *Molecular Biology and Evolution*,  
949 36(10), 2292–2312. <http://doi.org/10.1093/molbev/msz147>
- 950 48. Midlej, V., de Souza, W., & Benchimol, M. (2019). The peripheral vesicles gather  
951 multivesicular bodies with different behavior during the *Giardia intestinalis* life  
952 cycle. *Journal of Structural Biology*, 207(3), 301–311.  
953 <http://doi.org/10.1016/j.jsb.2019.07.002>
- 954 49. Ma'ayeh, S.Y., Liu, J., Peirasmaki, D., Hörnaeus, K., Bergström, L.S, ..., Svärd,  
955 S.G. (2017). Characterization of the *Giardia intestinalis* secretome during  
956 interaction with human intestinal epithelial cells: The impact on host cells. *PLoS  
957 Neglected Tropical Diseases*, 11(11), e0006120
- 958 50. Coelho, C.H. & Singer, S.M. (2018). Recent advances in the *Giardia*-host  
959 relationship reveal danger lurking behind the smile. *PLoS Neglected Tropical  
960 Diseases*, 12(9), e0006625

- 961 51. Moyano, S., Musso, J., Feliziani, C., Zamponi, N., Frontera, L.S., ..., Touz, M.  
962 (2019). Exosome Biogenesis in the Protozoa Parasite *Giardia lamblia*: A Model of  
963 Reduced Interorganellar Crosstalk. *Cells*, 8(12), pii:E1600
- 964 52. Dutta, S., Saha, N., Ray, A., & Sarkar, S. (2015). Significantly Diverged  
965 Did2/VPS46 Orthologues from the Protozoan Parasite *Giardia lamblia*. *Current*  
966 *Microbiology*. <http://doi.org/10.1007/s00284-015-0844-4>
- 967 53. Mast, F.D., Herricks, T., Strehler, K.M., Miller, L.R., Saleem, R.A., Rachubinski,  
968 R.A. Aitchison, J.D. (2018). ESCRT-III is required for scissioning new peroxisomes  
969 from the endoplasmic reticulum. *Journal Cell Biology*, 217(6), 2087-2102
- 970 54. Olmos, Y., Perdrix-Rosell, A., & Carlton, J.G. (2016). Membrane Binding by  
971 CHMP7 Coordinates ESCRT-III-Dependent Nuclear Envelope Reformation.  
972 *Current Biology*, 26(19), 2635-2641
- 973 55. Lobert, V. H. L., & Stenmark, H. (2012). The ESCRT machinery mediates  
974 polarization of fibroblasts through regulation of myosin light chain. *Journal of Cell*  
975 *Science*, 125(1), 29–36. <http://doi.org/10.1242/jcs.088310>
- 976 56. Richardson, L. G. L., Clendening, E. A., Sheen, H., Gidda, S. K., White, K. A., &  
977 Mullen, R. T. (2014). A Unique N-Terminal Sequence in the Carnation Italian  
978 ringspot virus p36 Replicase-Associated Protein Interacts with the Host Cell  
979 ESCRT-I Component VPS23. *Journal of Virology*, 88(11), 6329–6344.  
980 <http://doi.org/10.1128/jvi.03840-13>
- 981 57. Hammerling, B. C., Najor, R. H., Cortez, M. Q., Shires, S. E., Leon, L. J., Gonzalez,  
982 E. R., ... Gustafsson, Å. B. (2017). A Rab5 endosomal pathway mediates Parkin-  
983 dependent mitochondrial clearance. *Nature Communications*, 8.  
984 <http://doi.org/10.1038/ncomms14050>
- 985 58. Zhen, Y., Spangenberg, H., Munson, M.J., Brech, A., Schink, K.O, ..., Stenmark,  
986 H. (2019). ESCRT-mediated phagophore sealing during mitophagy. *Autophagy*, 1,  
987 1-16
- 988 59. Anding, A. L., Wang, C., Chang, T. K., Sliter, D. A., Powers, C. M., Hofmann, K.,  
989 ... Baehrecke, E. H. (2018). VPS13D Encodes a Ubiquitin-Binding Protein that Is  
990 Required for the Regulation of Mitochondrial Size and Clearance. *Current Biology*,  
991 28(2), 287–295.e6. <http://doi.org/10.1016/j.cub.2017.11.064>
- 992 60. Tanifuji, G., Takabayashi, S., Kume, K., Mizue, T., Nakayama, T., ... Hashimoto,  
993 T. (2018). The draft genome of *Kipferlia bialata* reveals reductive genome evolution  
994 in fornicate parasites. *PLoS One*, 13(3):e0194487.  
995 <https://doi.org/10.1371/journal.pone.0294487>
- 996 61. Xu, F., Jerlström-Hultqvist, J., Einarsson, E., Ástvaldsson, Á., Svärd, S. G., &  
997 Andersson, J. O. (2014). The Genome of *Spironucleus salmonicida* Highlights a  
998 Fish Pathogen Adapted to Fluctuating Environments. *PLoS Genetics*.  
999 <https://doi.org/10.1371/journal.pgen.1004053>
- 1000 62. Xu, F., Jerlström-Hultqvist, J., Kolisko, M., Simpson, A. G. B., Roger, A. J., Svärd,  
1001 S. G., & Andersson, J. O. (2016). On the reversibility of parasitism: adaptation to  
1002 a free-living lifestyle via gene acquisitions in the diplomonad *Trepomonas* sp. PC1.  
1003 <https://doi.org/10.1186/s12915-016-0284-z>
- 1004 63. Morrison, H. G., McArthur, A. G., Gillin, F. D., Aley, S. B., Adam, R. D., Olsen, G.  
1005 J., ... Sogin, M. L. (2007). Genomic Minimalism in the Early Diverging Intestinal  
1006 Parasite *Giardia lamblia*, 317(September), 1921–1927.

- 1007 64. Adam, R. D., Dahlstrom, E. W., Martens, C. A., Bruno, D. P., Barbian, K. D.,  
1008 Ricklefs, S. M., ... Nash, T. E. (2013). Genome sequencing of *Giardia lamblia*  
1009 genotypes A2 and B isolates (DH and GS) and comparative analysis with the  
1010 genomes of Genotypes A1 and E (WB and pig). *Genome Biology and Evolution*,  
1011 5(12), 2498-511. <https://doi.org/10.1093/gbe/evt197>
- 1012 65. Franzén, O., Jerlström-Hultqvist, J., Castro, E., Sherwood, E., Ankarklev, J.,  
1013 Reiner, D. S., ... Svärd, S. G. (2009). Draft genome sequencing of *Giardia*  
1014 *intestinalis* assemblage B isolate GS: Is human giardiasis caused by two different  
1015 species? *PLoS Pathogens*, 5(8), e1000560.  
1016 <https://doi.org/10.1371/journal.ppat.1000560>
- 1017 66. Jerlström-Hultqvist, J., Franzén, O., Ankarklev, J., Xu, F., Nohýnková, E.,  
1018 Andersson, J. O., ... Andersson, B. (2010). Genome analysis and comparative  
1019 genomics of a *Giardia intestinalis* assemblage E isolate. *BMC Genomics* 7(11),  
1020 543.
- 1021 67. Leger, M. M., Kolisko, M., Kamikawa, R., Stairs, C. W., Kume, K., Čepička, I., ...  
1022 Roger, A. J. (2017). Organelles that illuminate the origins of Trichomonas  
1023 hydrogenosomes and *Giardia* mitosomes. *Nature Ecology and Evolution*, 1(4),  
1024 0092. <https://doi.org/10.1038/s41559-017-0092>
- 1025 68. Tang, S., Lomsadze, A., & Borodovsky, M. (2015). Identification of protein coding  
1026 regions in RNA transcripts, 43(12), e78. <https://doi.org/10.1093/nar/gkv227>
- 1027 69. Edgar, R. C. (2004). MUSCLE: multiple sequence alignment with high accuracy  
1028 and high throughput. *Nucleic Acids Research*, 32(5), 1792–1797.  
1029 <https://doi.org/10.1093/nar/gkh340>
- 1030 70. Eddy, S. R. (1998). Profile hidden Markov models. *Bioinformatics*, 14(9), 755–763.
- 1031 71. Berman, H. M. (2008). The Protein Data Bank: a historical perspective. *Acta*  
1032 *Crystallographica Section A*, A64(1), 88–95.  
1033 <https://doi.org/10.1107/S0108767307035623>
- 1034 72. Roy, A., Kucukural, A., & Zhang, Y. (2010). I-TASSER: a unified platform for  
1035 automated protein structure and function prediction. *Nature Protocols*, 5(4), 725–  
1036 738. <https://doi.org/10.1038/nprot.2010.5>
- 1037 73. Maddison, W.P., & Maddison, D.R. (2018). Mesquite: a modular system for  
1038 evolutionary analysis. <http://www.mesquiteproject.org>
- 1039 74. Stamatakis, A. (2014). RAxML version 8: A tool for phylogenetic analysis and post-  
1040 analysis of large phylogenies. *Bioinformatics*, 30(9), 1312-13.  
1041 <https://doi.org/10.1093/bioinformatics/btu033>
- 1042 75. Nguyen, L.-T., Schmidt, H. A., von Haeseler, A., & Minh, B. Q. (2015). IQ-TREE:  
1043 a fast and effective stochastic algorithm for estimating maximum-likelihood  
1044 phylogenies. *Molecular Biology and Evolution*, 32(1), 268–274.  
1045 <https://doi.org/10.1093/molbev/msu300>
- 1046 76. Darriba, D., Taboada, G. L., Doallo, R., & Posada, D. (2011). ProtTest 3: fast  
1047 selection of best-fit models of protein evolution. *BIOINFORMATICS*  
1048 *APPLICATIONS NOTE*, 27(8), 1164–1165.  
1049 <https://doi.org/10.1093/bioinformatics/btr088>
- 1050 77. Felsenstein, J. (1989). PHYLIP - phylogeny inference package (Version 3.2).  
1051 *Cladistics*, 5, 154–166.

- 1052 78. Kalyaanamoorthy, S., Minh, B. Q., Wong, T. K. F., Von Haeseler, A., & Jermini, L.  
1053 S. (2017). ModelFinder: Fast model selection for accurate phylogenetic estimates.  
1054 *Nature Methods*, 14(6), 587-89. <https://doi.org/10.1038/nmeth.4285>  
1055 79. Huelsenbeck, J. P., & Ronquist, F. (2001). MRBAYES: Bayesian inference of  
1056 phylogenetic trees. *Bioinformatics*, 17(8), 754-55.  
1057 <http://doi.org/10.1093/bioinformatics/17.8.754>  
1058 80. Miller, M. A., Schwartz, T., Pickett, B. E., He, S., Klem, E. B., Scheuermann, R. H.,  
1059 ... O'Leary, M. A. (2015). A RESTful API for access to phylogenetic tools via the  
1060 CIPRES science gateway. *Evolutionary Bioinformatics*, 11, 43-48.  
1061 <http://doi.org/10.4137/EBO.S21501>  
1062 81. Morf, L., Spycher, C., Rehrauer, H., Fournier, C. A., Morrison, H. G., & Hehl, A. B.  
1063 (2010). The transcriptional response to encystation stimuli in *Giardia lamblia* is  
1064 restricted to a small set of genes. *Eukaryotic Cell*, 9(10), 1566-1576.  
1065 <http://doi.org/10.1128/EC.00100-10>  
1066 82. Wampfler, P. B., Tosevski, V., Nanni, P., Spycher, C., & Hehl, A. B. (2014).  
1067 Proteomics of secretory and endocytic organelles in *Giardia lamblia*. *PloS one*,  
1068 9(4), e94089. <https://doi.org/10.1371/journal.pone.0094089>  
1069 83. Konrad, C., Spycher, C., & Hehl, A. B. (2010). Selective condensation drives  
1070 partitioning and sequential secretion of cyst wall proteins in differentiating *Giardia*  
1071 *lamblia*. *PLoS Pathogens*, 6(4), 1-12. <http://doi.org/10.1371/journal.ppat.1000835>  
1072 84. Gaechter, V., Schraner, E., Wild, P., & Hehl, A. B. (2008). The single dynamin  
1073 family protein in the primitive protozoan *giardia lamblia* is essential for stage  
1074 conversion and endocytic transport. *Traffic*, 9(1), 57-71.  
1075 <http://doi.org/10.1111/j.1600-0854.2007.00657.x>  
1076 85. Schindelin, J., Arganda-Carreras, I., Frise, E., Kaynig, V., Longair, M., Pietzsch,  
1077 T., ... Cardona, A. (2012). Fiji: An open-source platform for biological-image  
1078 analysis. *Nature Methods*, 9(7), 676-682. <http://doi.org/10.1038/nmeth.2019>  
1079 86. Costes, S. V., Daelemans, D., Cho, E. H., Dobbin, Z., Pavlakis, G., & Lockett, S.  
1080 (2004). Automatic and Quantitative Measurement of Protein-Protein Colocalization  
1081 in Live Cells, 86(June), 3993-4003. <https://doi.org/10.1529/biophysj.103.038422>  
1082 87. Zimmermann, L., Stephens, A., Nam, S. Z., Rau, D., Kübler, J., Lozajic, M., ...  
1083 Alva, V. (2018). A Completely Reimplemented MPI Bioinformatics Toolkit with a  
1084 New HHpred Server at its Core. *Journal of Molecular Biology*, 430(15), 2237-2243.  
1085 <http://doi.org/10.1016/j.jmb.2017.12.007>  
1086 88. Perez-Riverol, Y., Csordas, A., Bai, J., Bernal-Llinares, M., Hewapathirana, S.,  
1087 Kundu, D. J., ... Vizcaíno, J. A. (2019). The PRIDE database and related tools and  
1088 resources in 2019: Improving support for quantification data. *Nucleic Acids*  
1089 *Research*, 47(D1), D442-D450. <http://doi.org/10.1093/nar/gky1106>  
1090 89. Arganda-Carreras I, Kaynig V, Rueden C, Eliceiri KW, Schindelin J, Cardona A, et  
1091 al. (2017). Trainable Weka Segmentation: A machine learning tool for microscopy  
1092 pixel classification. *Bioinformatics*.;33: 2424-2426.  
1093 doi:10.1093/bioinformatics/btx180  
1094  
1095  
1096  
1097



1098 **SUPPLEMENTARY MATERIAL**

1099

1100 **Figures**

1101 **Figure S1.** The ESCRT machinery is composed of five sub-complexes each functioning  
1102 consecutively for recruitment of the downstream subcomplex. The process begins with  
1103 the recruitment of ESCRT-0 or its analogue TOM1-esc for recognition of tagged Ubiquitin  
1104 on cargo, and endosomal membrane phospholipids such as phosphatidylinositol 3-  
1105 phosphate (PtdIns(3)P) upon which the ESCRTI, composed of VPS23, VPS28, and  
1106 VPS37, is recruited, with its only known role being ubiquitin recognition via its UIM domain  
1107 (Raiborg and Stenmark, 2009). The assembly of ESCRTI then leads to assembly of the  
1108 heterotetrameric ESCRTII consisting of VPS36, VPS22, and two copies of VPS25 which  
1109 also bind to PtdIns(3)P via the FYVE domains (Raiborg and Stenmark, 2009). Finally, this  
1110 leads to the recruitment of the ESCRTIII machinery, a heteropentameric complex  
1111 consisting of SNF7 family proteins, VPS20, VPS32, VPS2, VPS24, and CHMP7 (Raiborg  
1112 and Stenmark, 2009). A filamentous VPS32 polypeptide capped by VPS2 and VPS24  
1113 induces ILV formation by constricting the neck of the budding vesicle, a process which is  
1114 catalysed by the ESCRT-III A VPS4, an AAA+ ATPase (Raiborg and Stenmark, 2009). It  
1115 is also hypothesized that ESCRT-III A components such as VPS31 and VPS46 are  
1116 required for stabilizing the sub-complexes during the budding processes while others are  
1117 needed for recycling of the complexes back into the cytosol once the process is complete  
1118 (Odorizzi, 2003). Figure adapted from Stenmark and Raiborg, 2009.

1119

1120 **Figure S2.** Phylogenetic analyses of the individual VPS20-SNF7 family proteins from  
1121 ESCRTIII and ESCRTIIIA sub-complexes which depicts pan-eukaryotic VPS20/32/60  
1122 with *Carpodemonas membranifera* SNF7 family proteins used as landmark  
1123 representative for Fornicata. Tree inference was carried out using both BI and ML  
1124 analyses. RAXML best model was determined to be LG+G+F while IQ-TREE ModelFinder  
1125 determined an equivalent LG+G4+F. Two of the identified SNF7 sequences from  
1126 *Carpodemonas membranifera* clustered clearly with VPS60 whereas the remainder  
1127 neither grouped with VPS20 or VPS32 and therefore were determined to be VPS20L  
1128 proteins in all tree topologies

1129

1130 **Figure S3.** Phylogenetic analyses of the individual VPS20-SNF7 family proteins from  
1131 ESCRTIII and ESCRTIIIA sub-complexes depicts a Fornicata specific tree with well  
1132 characterized Excavata representatives *Monocercomonoides exilis*, *Trichomonas*  
1133 *vaginalis*, and *Naegleria gruberi* where no identified diplomonad SNF7 sequences  
1134 grouped with VPS60. All identified *Giardia* SNF7 sequences grouped with VPS20 from  
1135 other metamonads and therefore were also determined to be VPS20L sequences. Both  
1136 trees were rooted at ESCRTIII-VPS60 highlighted in red (Leung et al., 2008).

1137

1138 **Figure S4. Population-level expression analysis of epitope-tagged ESCRT**  
1139 **subunits.** (I) *G*VPS25HA is expressed in 92% of screened cells. (II) *G*VPS36A-HA is  
1140 expressed in 86% of screened cells. (III) *Gi*-HA-VPS20L is expressed in 85% of cells  
1141 while (IV) *Gi*-HA-CHMP7 is expressed in 90% of the cells. (V) Detailed results used for  
1142 quantification. All scale bars: 20  $\mu$ m.

1143

1144 **Figure S5. Population-level analysis of cells co-labelled for ESCRT subunits and**  
1145 **selected subcellular markers.** (I) *G*VPS25-HA with Dextran TexasRed and (II) with  
1146 *Gi*PDI2. (III) *G*VPS36A-HA with Dextran TexasRed and (IV) with *Gi*PDI2. (V) *Gi*-HA-  
1147 VPS20L with *Gi*PDI2. (VI) *Gi*-HA-CHMP7 with *Gi*PDI2 and (VII) when counterstained for  
1148 *Gi*iscU. (VIII) Detailed results used for signal overlap quantification. Scale bars: (I, V-VII)  
1149 20  $\mu$ m and (II-IV) 10  $\mu$ m.

1150

1151 **Figure S6.** Phylogenetic analyses of the individual SNF7-VPS2 family proteins from  
1152 ESCRTIII and ESCRTIIIA sub-complexes depicts pan-eukaryotic VPS2/24/46 with  
1153 *Carpodiemonas membranifera* VPS2 family proteins used as landmark representative for  
1154 Fornicata. Tree inference was carried out using both Bayesian Inference and Maximum  
1155 Likelihood analyses. RAxML best model was determined to be LG+G+F while IQ-TREE  
1156 ModelFinder determined an equivalent LG+G4+F. *Carpodiemonas membranifera* was  
1157 determined to have all three components with strong backbone support for VPS24  
1158 (1.0/100/100) and VPS46 (1.0/100/100).

1159



1160 **Figure S7.** Phylogenetic analyses of the individual SNF7-VPS2 family proteins from  
1161 ESCRTIII and ESCRTIII-A sub-complexes depicts a Fornicata specific tree with well  
1162 characterized Excavata representatives *Monocercomonoides exilis.*, *Trichomonas*  
1163 *vaginalis*, and *Naegleria gruberi* in order to classify divergent diplomonad sequences.  
1164 VPS2 family proteins identified in the diplomonads grouped with both VPS24 and VPS46  
1165 with duplication event pointing in *Giardia* spp. VPS46 yielding two paralogues, VPS46A  
1166 and VPS46B. An additional set of VPS2 family proteins which neither grouped clearly with  
1167 VPS2 or VPS24 and therefore were determined to be VPS24 like proteins. Tree was  
1168 rooted at ESCRTIII-VPS46 clade (Leung et. al. 2008).

1169

1170 **Figure S8.** Phylogenetic analyses of the *GiAWBCHMP7* and *GiBGSCHMP7* against  
1171 SNF7 components and CHMP7 c-terminus. Unrooted phylogenetic analyses of the  
1172 identified *Giardia* CHMP7 against CHMP7 c-termini from various pan-eukaryotic lineages  
1173 and previously its previously proposed homology to VPS20/32 SNF7 show exclusion of  
1174 the *Giardia* proteins with MRBAYES, RAxML, and IQTREE support 1.0/100/100

1175

1176 **Figure S9.** Phylogenetic analyses of the *GiAWBCHMP7* and *GiBGSCHMP7* against  
1177 SNF7 components and CHMP7 N-terminus. Unrooted phylogenetic analyses of the  
1178 identified CHMP7 against CHMP7 n-terminus and VPS20/32 SNF7 show inclusion of the  
1179 *Giardia* proteins within the pan-eukaryotic CHMP7 N-termini clade away from the  
1180 VPS20/32 clade with the support of 1.0/100/100

1181

1182 **Figure S10.** Phylogenetic analyses of the pan-eukaryotic CHMP7 N-termini against SNF7  
1183 VPS20/32 and CHMP7 C-terminus. Unrooted phylogenetic analyses of pan-eukaryotic  
1184 CHMP7 N-termini form a clade with exclusion to pan-eukaryotic CHMP7 C-termini and  
1185 pan-eukaryotic VPS20 and VPS32 contrary to the previously proposed homology to SNF7  
1186 with MRBAYES, RAxML, and IQTREE support of 1.0/100/100.

1187

1188 **Figure S11.** Phylogenetic analyses of the *GiAWBCHMP7* and *GiBGSCHMP7* and pan-  
1189 eukaryotic and pan-eukaryotic CHMP7 N-termini against pan-eukaryotic VPS25  
1190 orthologs. HHPRED analyses (See Supplementary Table S3) of the *Giardia* CHMP7

1191 proteins showed closest homology to ESCRTII-VPS25 and therefore were  
1192 phylogenetically tested to ensure that these were in fact not additional paralogs of *Giardia*  
1193 VPS25. Identified CHMP7 proteins were in fact not paralogs of the *Giardia* VPS25 which  
1194 grouped in the separate VPS25 clade with the backbone support of 0.99/99/99 to the  
1195 exclusion of CHMP7 clade. Tree was rooted onto ESCRTII-VPS22 pan-eukaryotic  
1196 proteins.

1197

## 1198 **Videos**

1199 **Supplementary Video 1.** Video reconstruction of *GVPS25*-HA confocal imaging  
1200 analyses and 3-dimensional rendering of subcellular localization, as depicted in Figure  
1201 3A.

1202

1203 **Supplementary Video 2.** Video reconstruction of *GVPS25*-HA confocal imaging  
1204 analyses and 3-dimensional rendering of intracellular co-localization with Dextran-  
1205 TexasRed, as depicted in Figure 3B.

1206

1207 **Supplementary Video 3.** Video reconstruction of *GVPS25*-HA confocal imaging  
1208 analyses and 3-dimensional rendering of intracellular co-localization with *G/*PD12, as  
1209 depicted in Figure 5B.

1210

1211 **Supplementary Video 4.** Video reconstruction of *GVPS36*-HA confocal imaging  
1212 analyses and 3-dimensional rendering of intracellular localization, as depicted in Figure  
1213 4A.

1214

1215 **Supplementary Video 5.** Video reconstruction of *GVPS36*-HA confocal imaging  
1216 analyses and 3-dimensional rendering of intracellular co-localization with Dextran-  
1217 TexasRed, as depicted in Figure 4B.

1218

1219 **Supplementary Video 6.** Video reconstruction of *GVPS36*-HA confocal imaging  
1220 analyses and 3-dimensional rendering of intracellular co-localization with *G/*PD12, as  
1221 depicted in Figure 5C.

1222

1223 **Supplementary Video 7.** Video reconstruction of *Gi*HA-VPS20L confocal imaging  
1224 analyses and 3-dimensional rendering of intracellular localization, as depicted in Figure  
1225 5A.

1226

1227 **Supplementary Video 8.** Video reconstruction of *Gi*HA-VPS20L confocal imaging  
1228 analyses and 3-dimensional rendering of intracellular co-localization with *Gi*PDI2, as  
1229 depicted in Figure 5D.

1230

1231 **Supplementary Video 9.** Video reconstruction of *Gi*HA-CHMP7 confocal imaging  
1232 analyses and 3-dimensional rendering of intracellular localization, as depicted in Figure  
1233 8A

1234

1235 **Supplementary Video 10.** Video reconstruction of *Gi*HA-CHMP7 confocal imaging  
1236 analyses and 3-dimensional rendering of intracellular co-localization with *Gi*PDI2, as  
1237 depicted in Figure 8B

1238

1239 **Supplementary Video 11.** Video reconstruction of *Gi*HA-CHMP7 confocal imaging  
1240 analyses and 3-dimensional rendering of intracellular co-localization with *Gi*lscU, as  
1241 depicted in Figure 8C

1242

1243

#### 1244 **Tables**

1245 **Table S1.** Pan eukaryotic ESCRT queries and databases used for retrieval of up-to-date  
1246 genomes and transcriptomes for homology searching and phylogenetic analyses

1247

1248 **Table S2.** Identified ESCRT components in Fornicata genomes and transcriptomes  
1249 identified and validated using HMMER, tBLASTn, BLASTP, HHPRED, and CDD domain  
1250 searches.

1251

1252 **Table S3.** HHPred analyses of pan-eukaryotic, including *Giardia*, CHMP7 N-termini.

1253

1254 **Table S4.** Oligonucleotides used for the cloning of *Giardia* ESCRT subunits of interest.

1255

1256

1257

1258

Pan-eukaryotic representatives

Excavata (Metamonada)

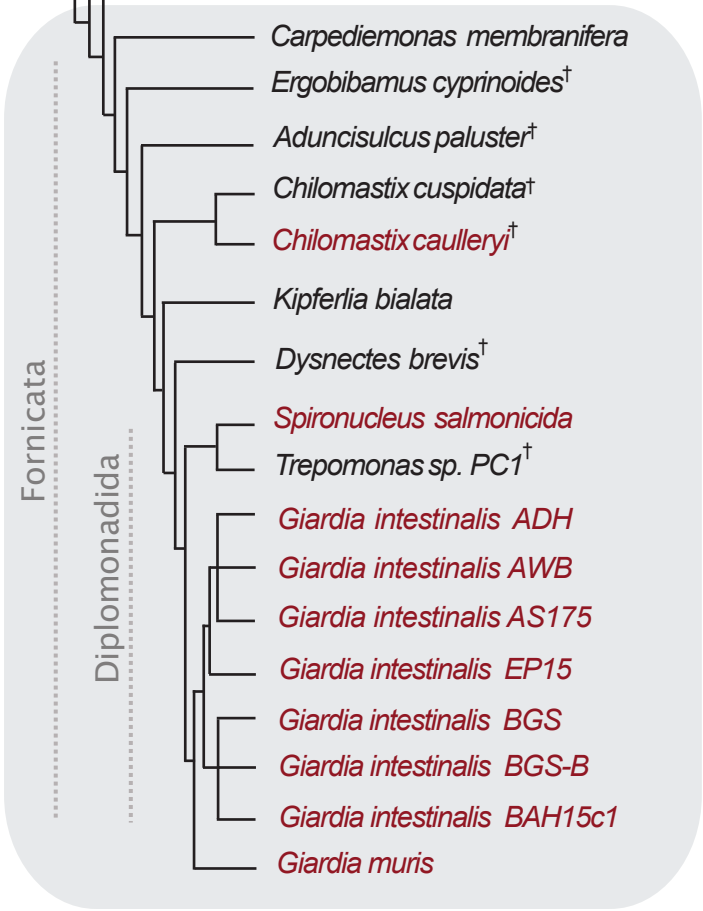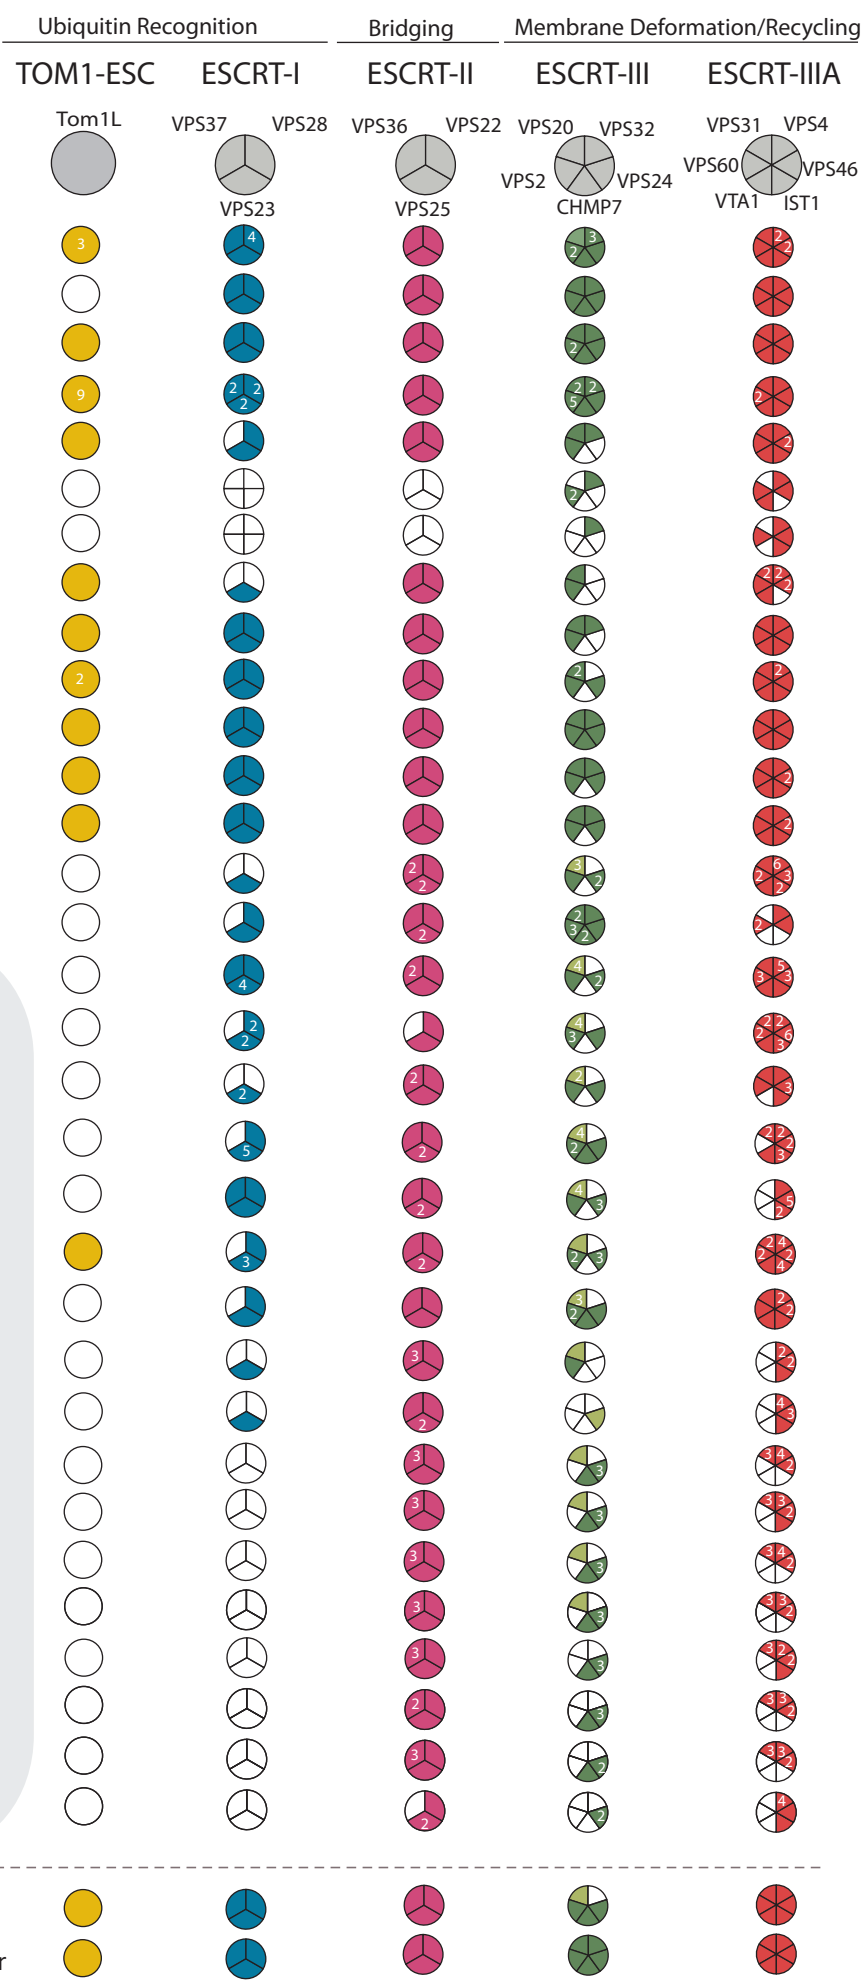

† Indicates transcriptome data



# Figure 3

## A

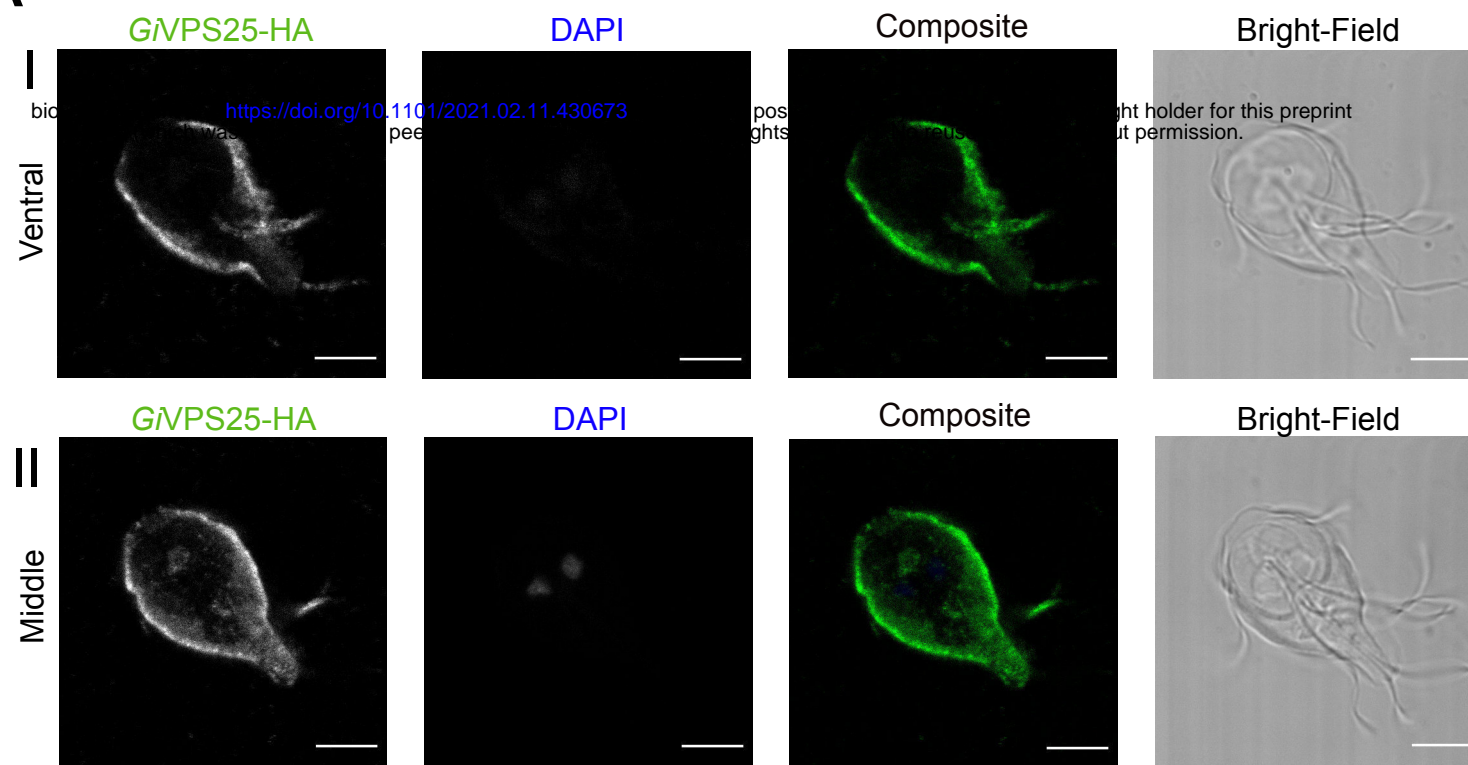

## B

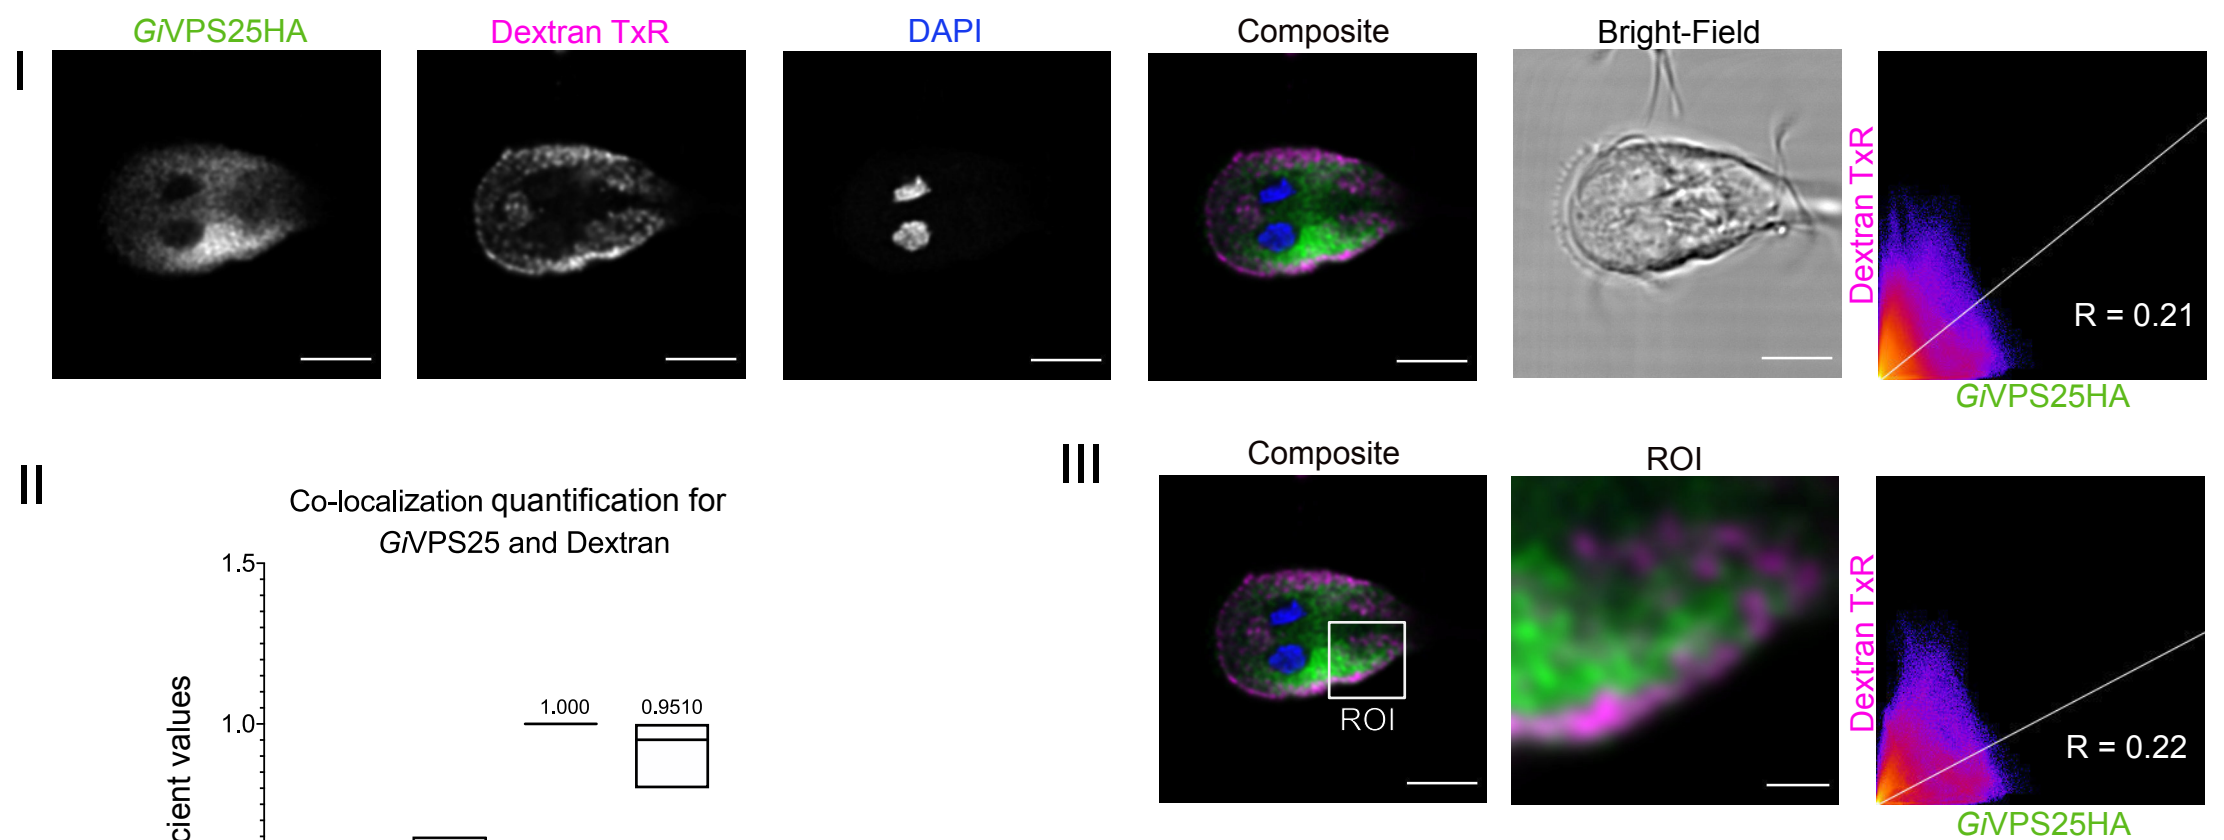

| Colocalization Parameters   | Complete image | ROI   |
|-----------------------------|----------------|-------|
| R (Pearson's coefficient)   | 0.21           | 0.22  |
| M1 (Mander's coefficient 1) | 0.782          | 0.895 |
| M2 (Mander's coefficient 2) | 0.777          | 0.911 |
| Costes p-value              | 1              | 1     |



Figure 4

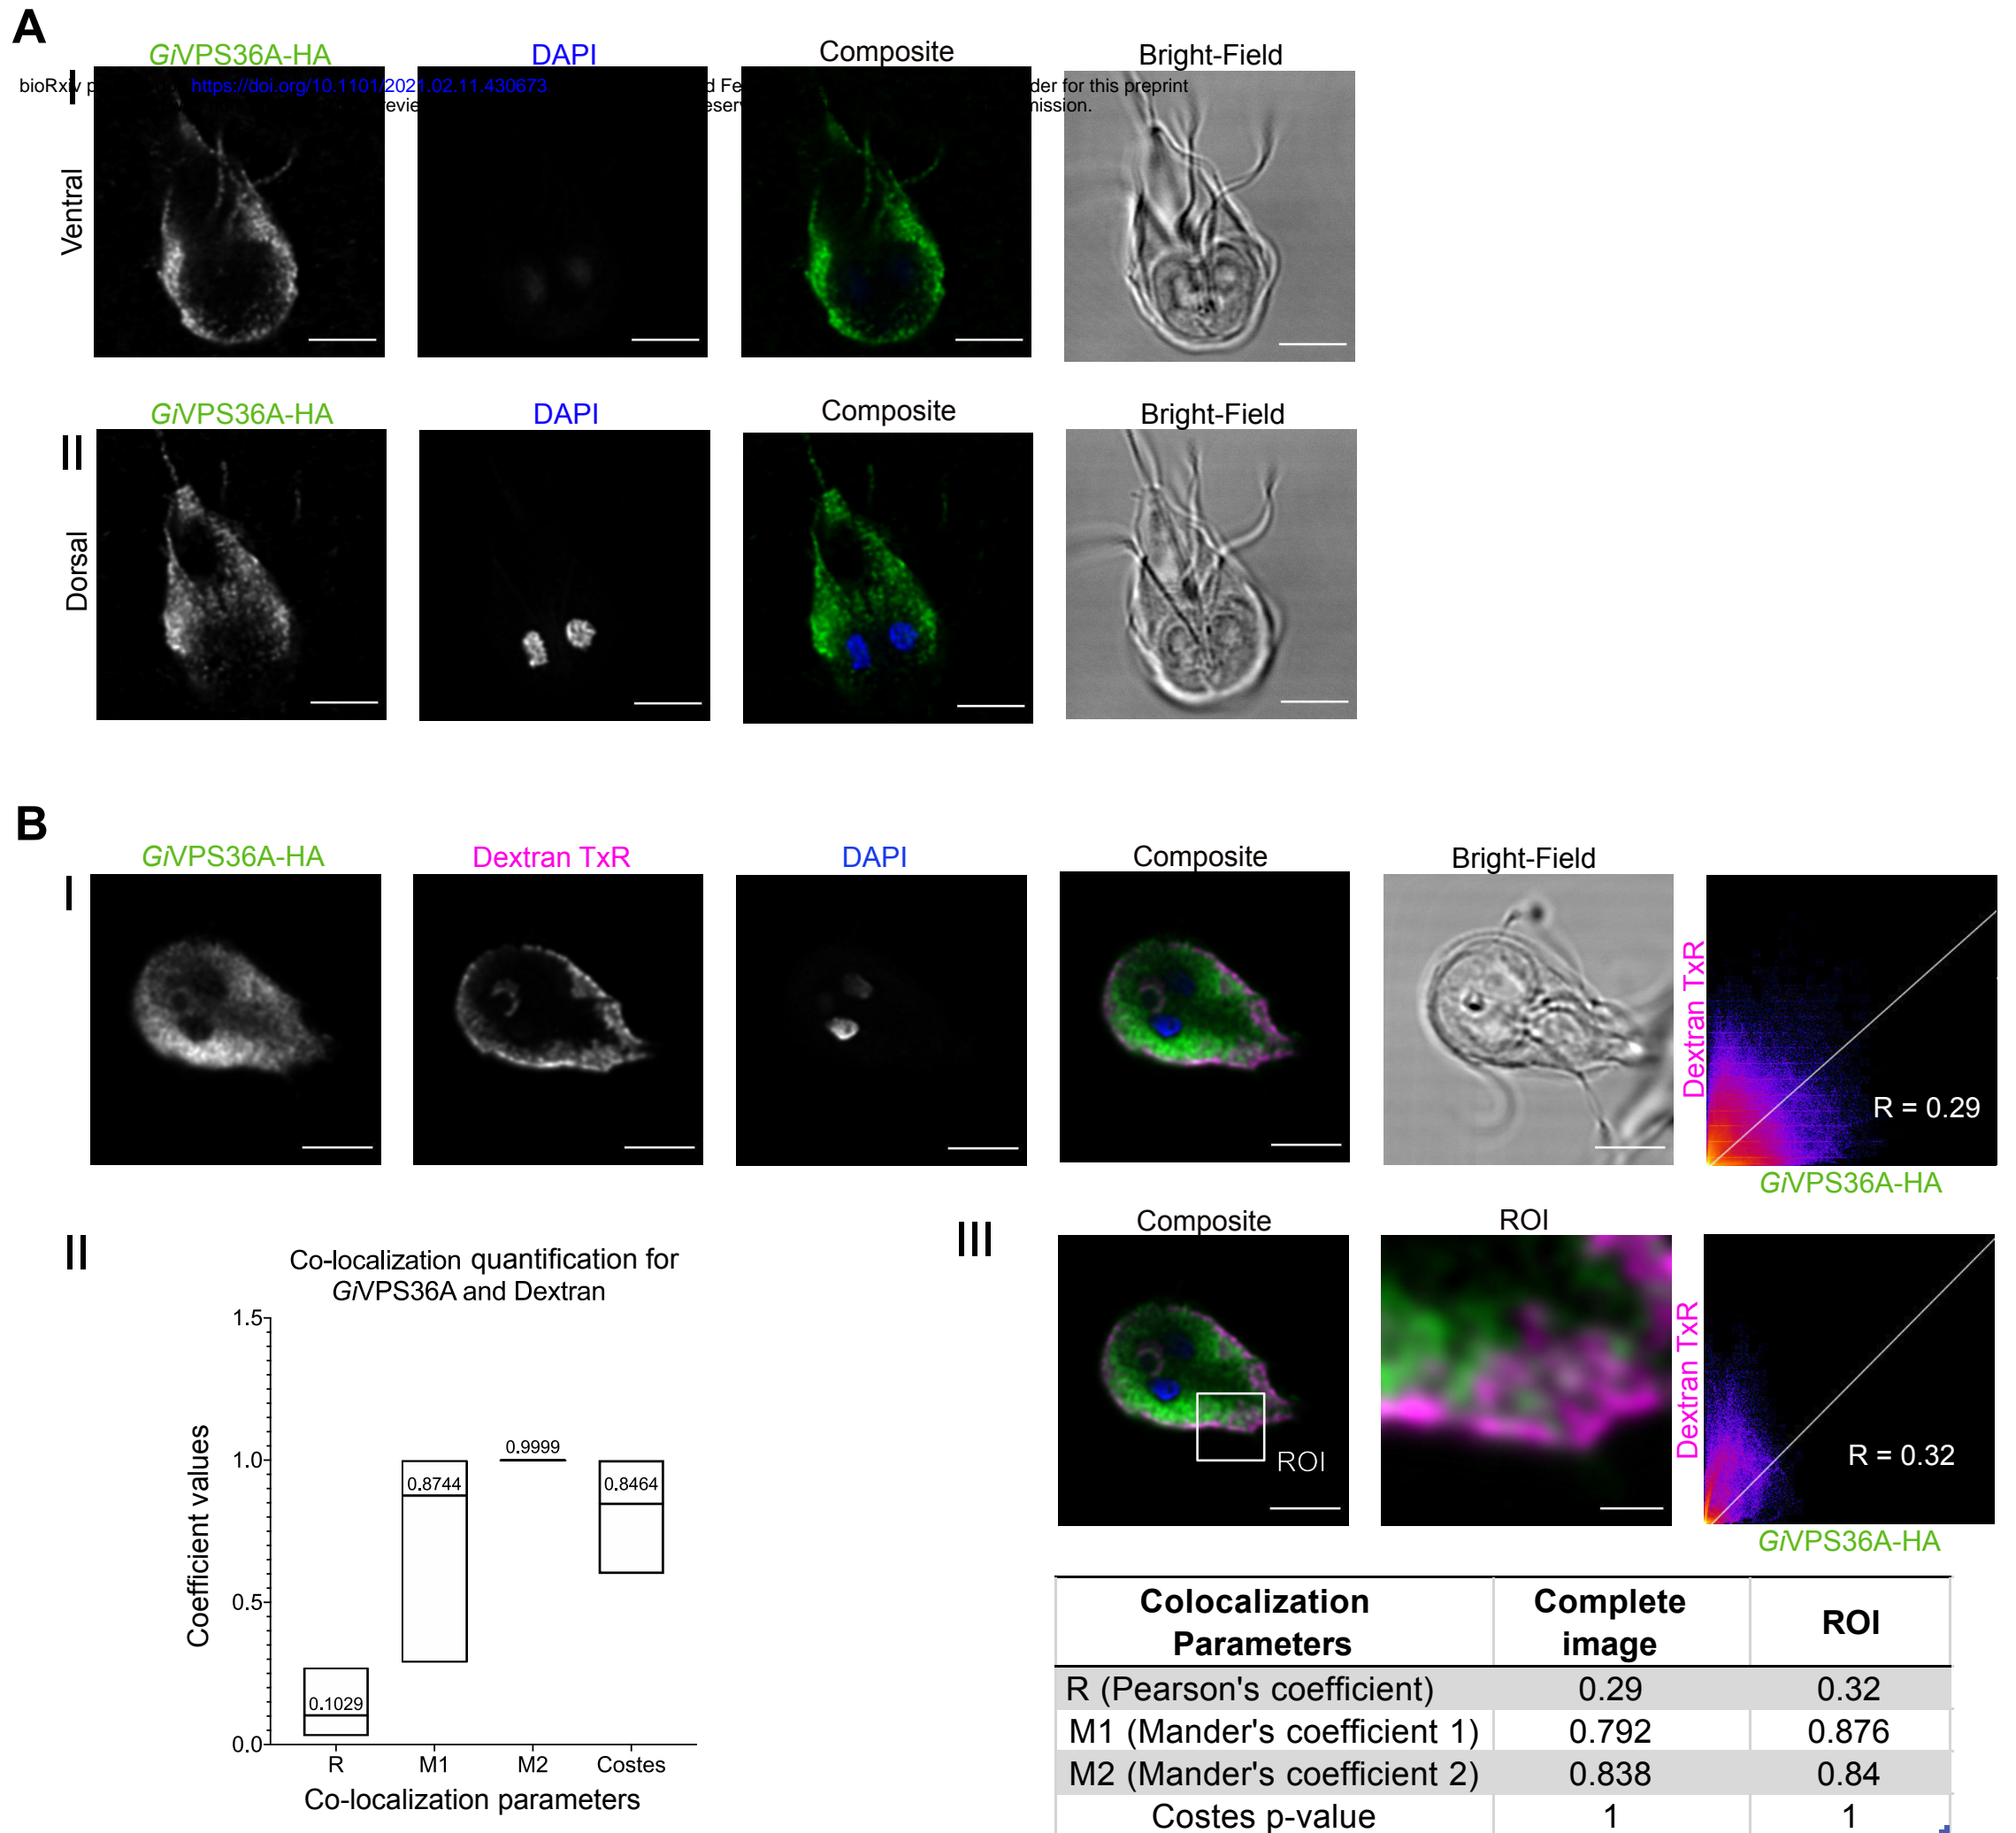

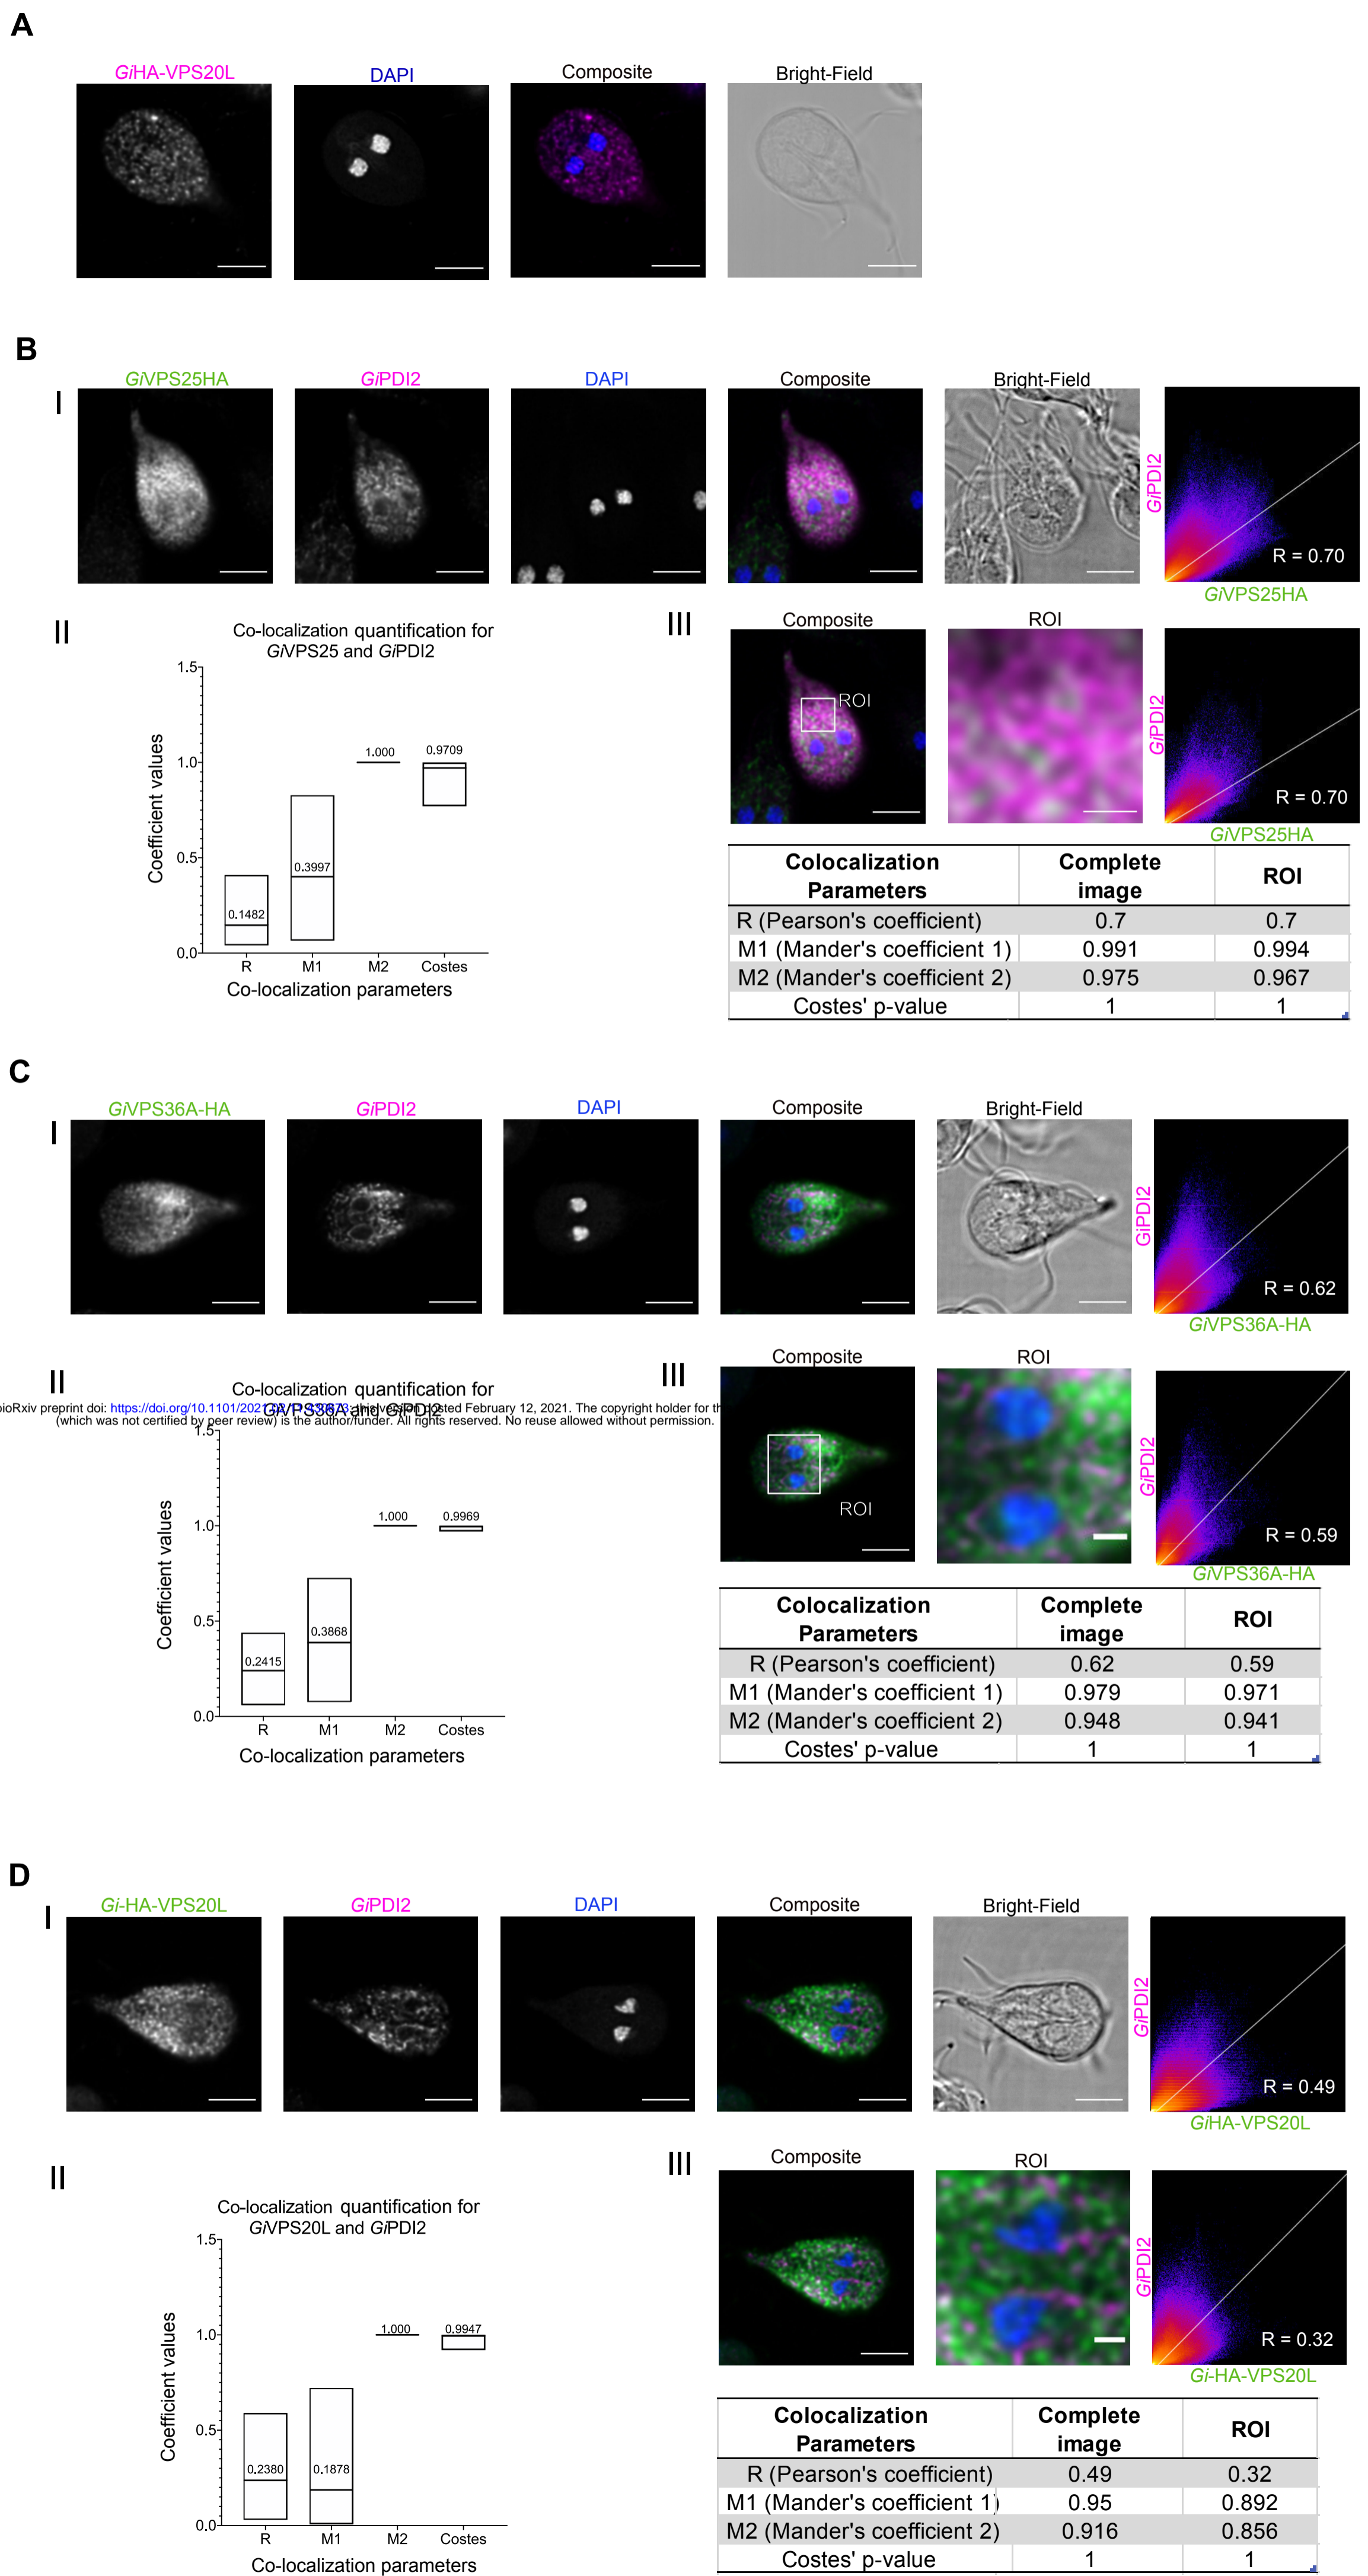



# A

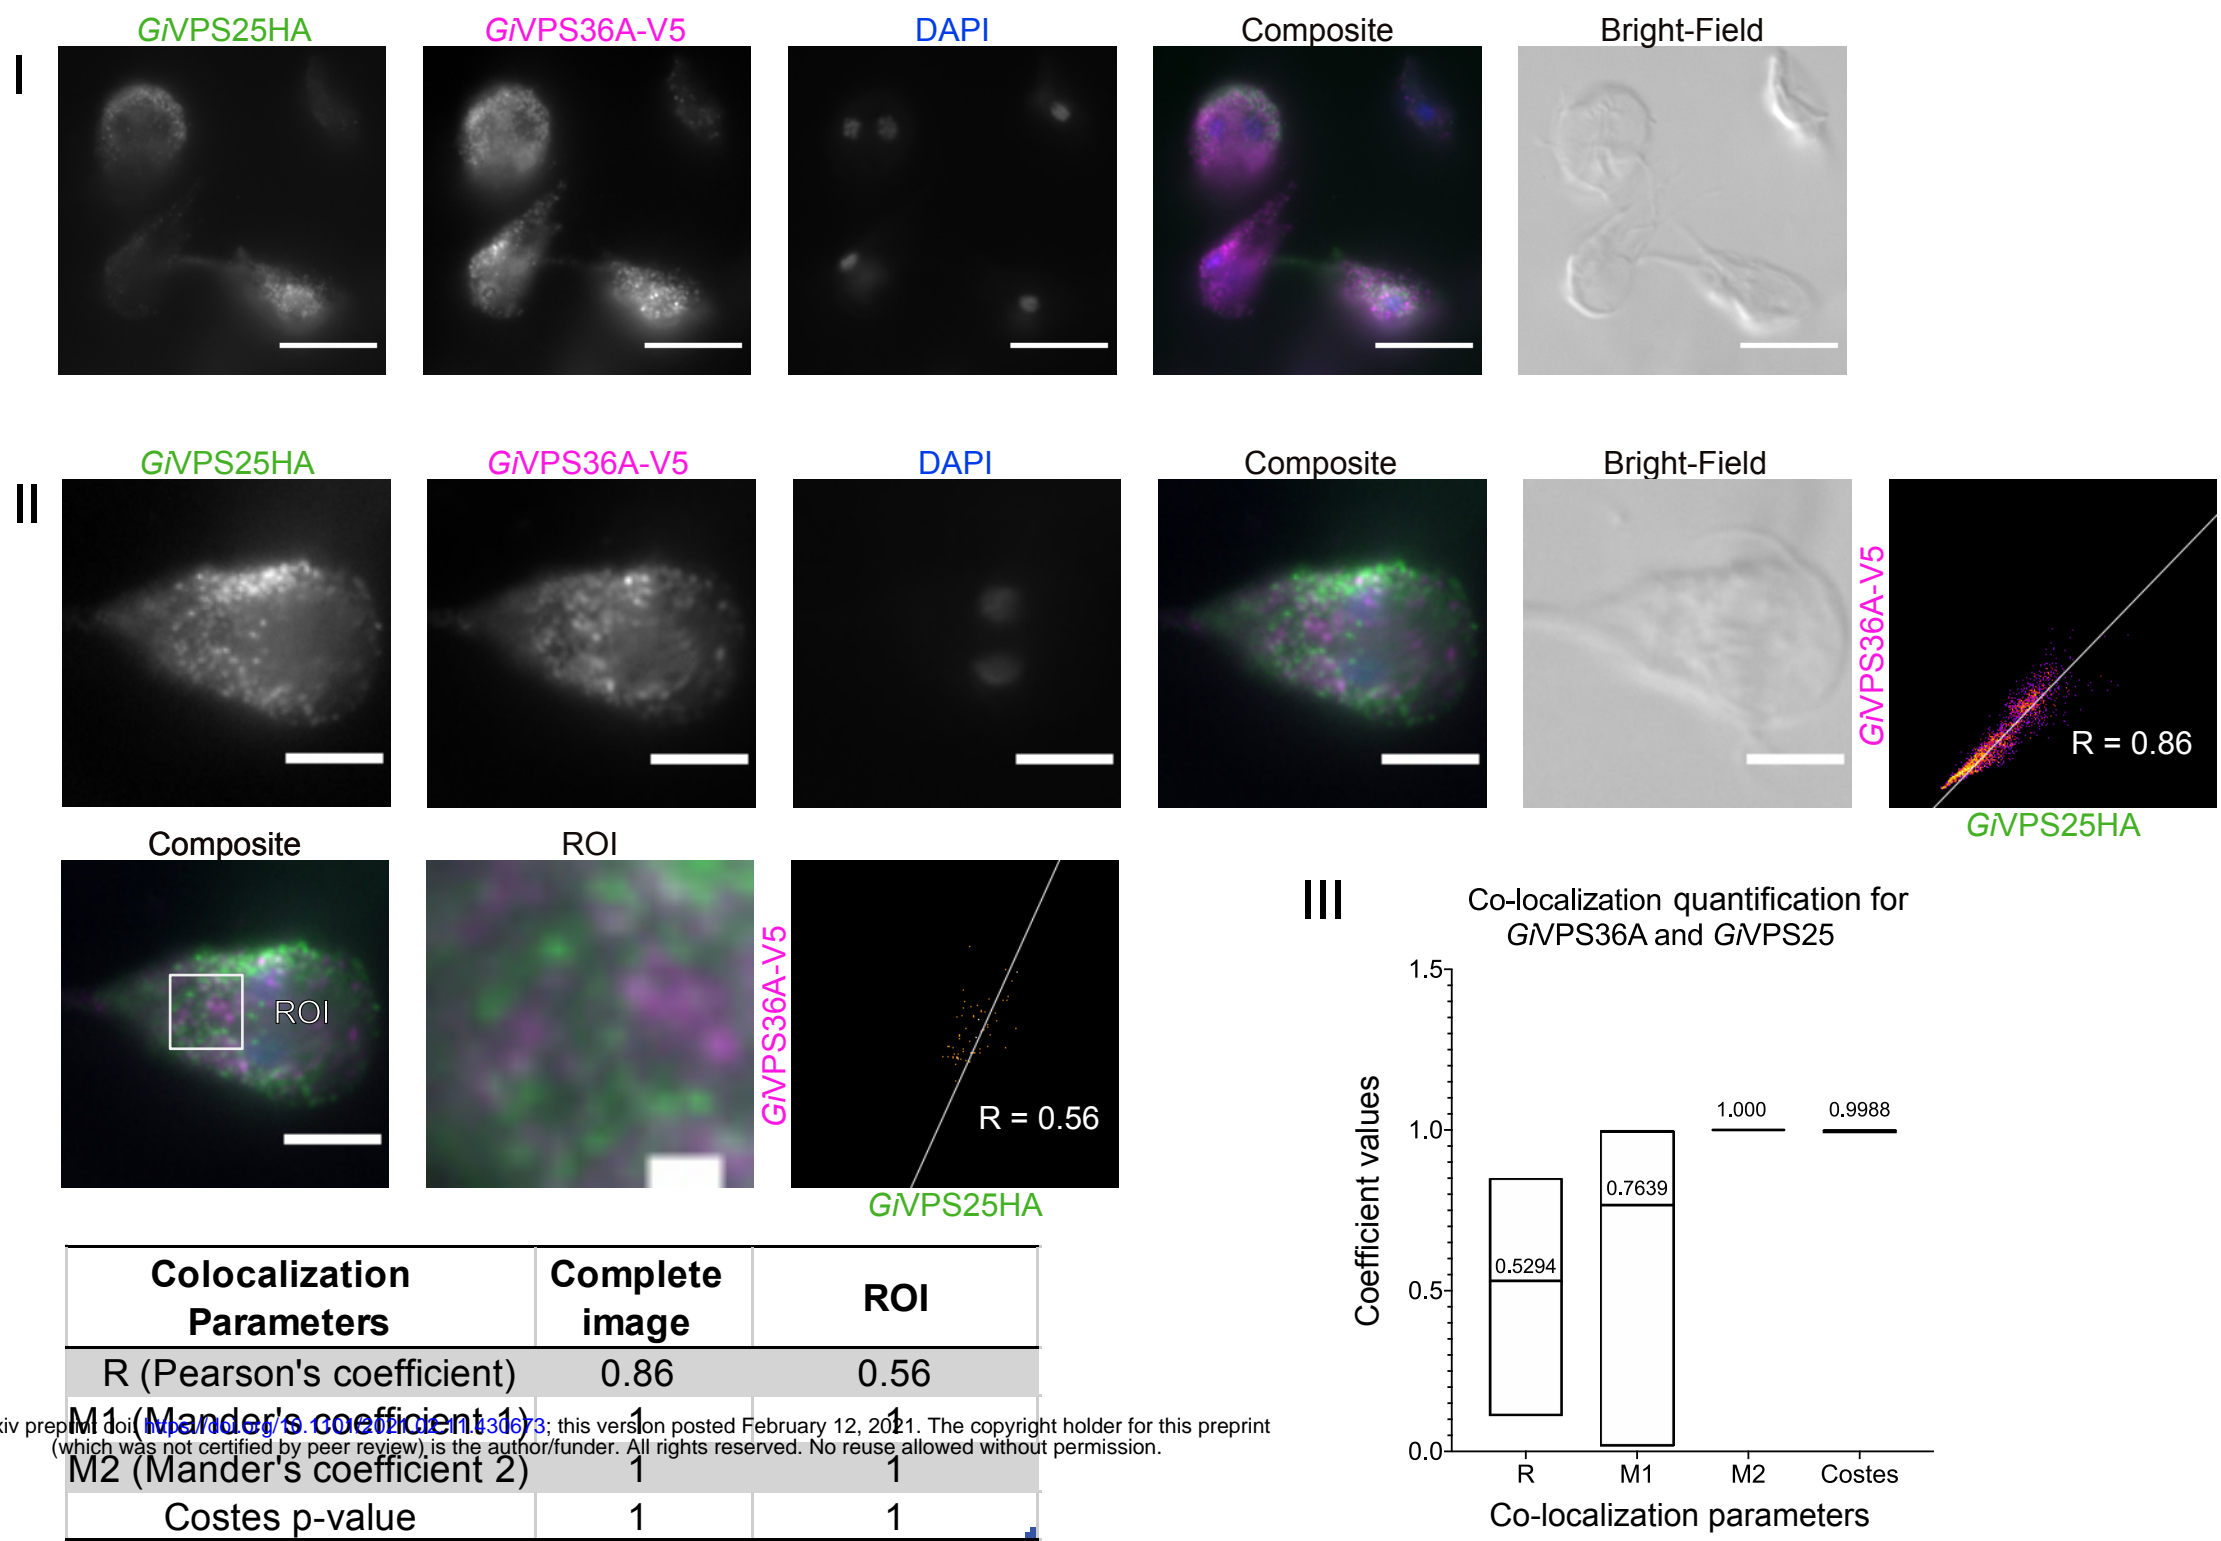

# B

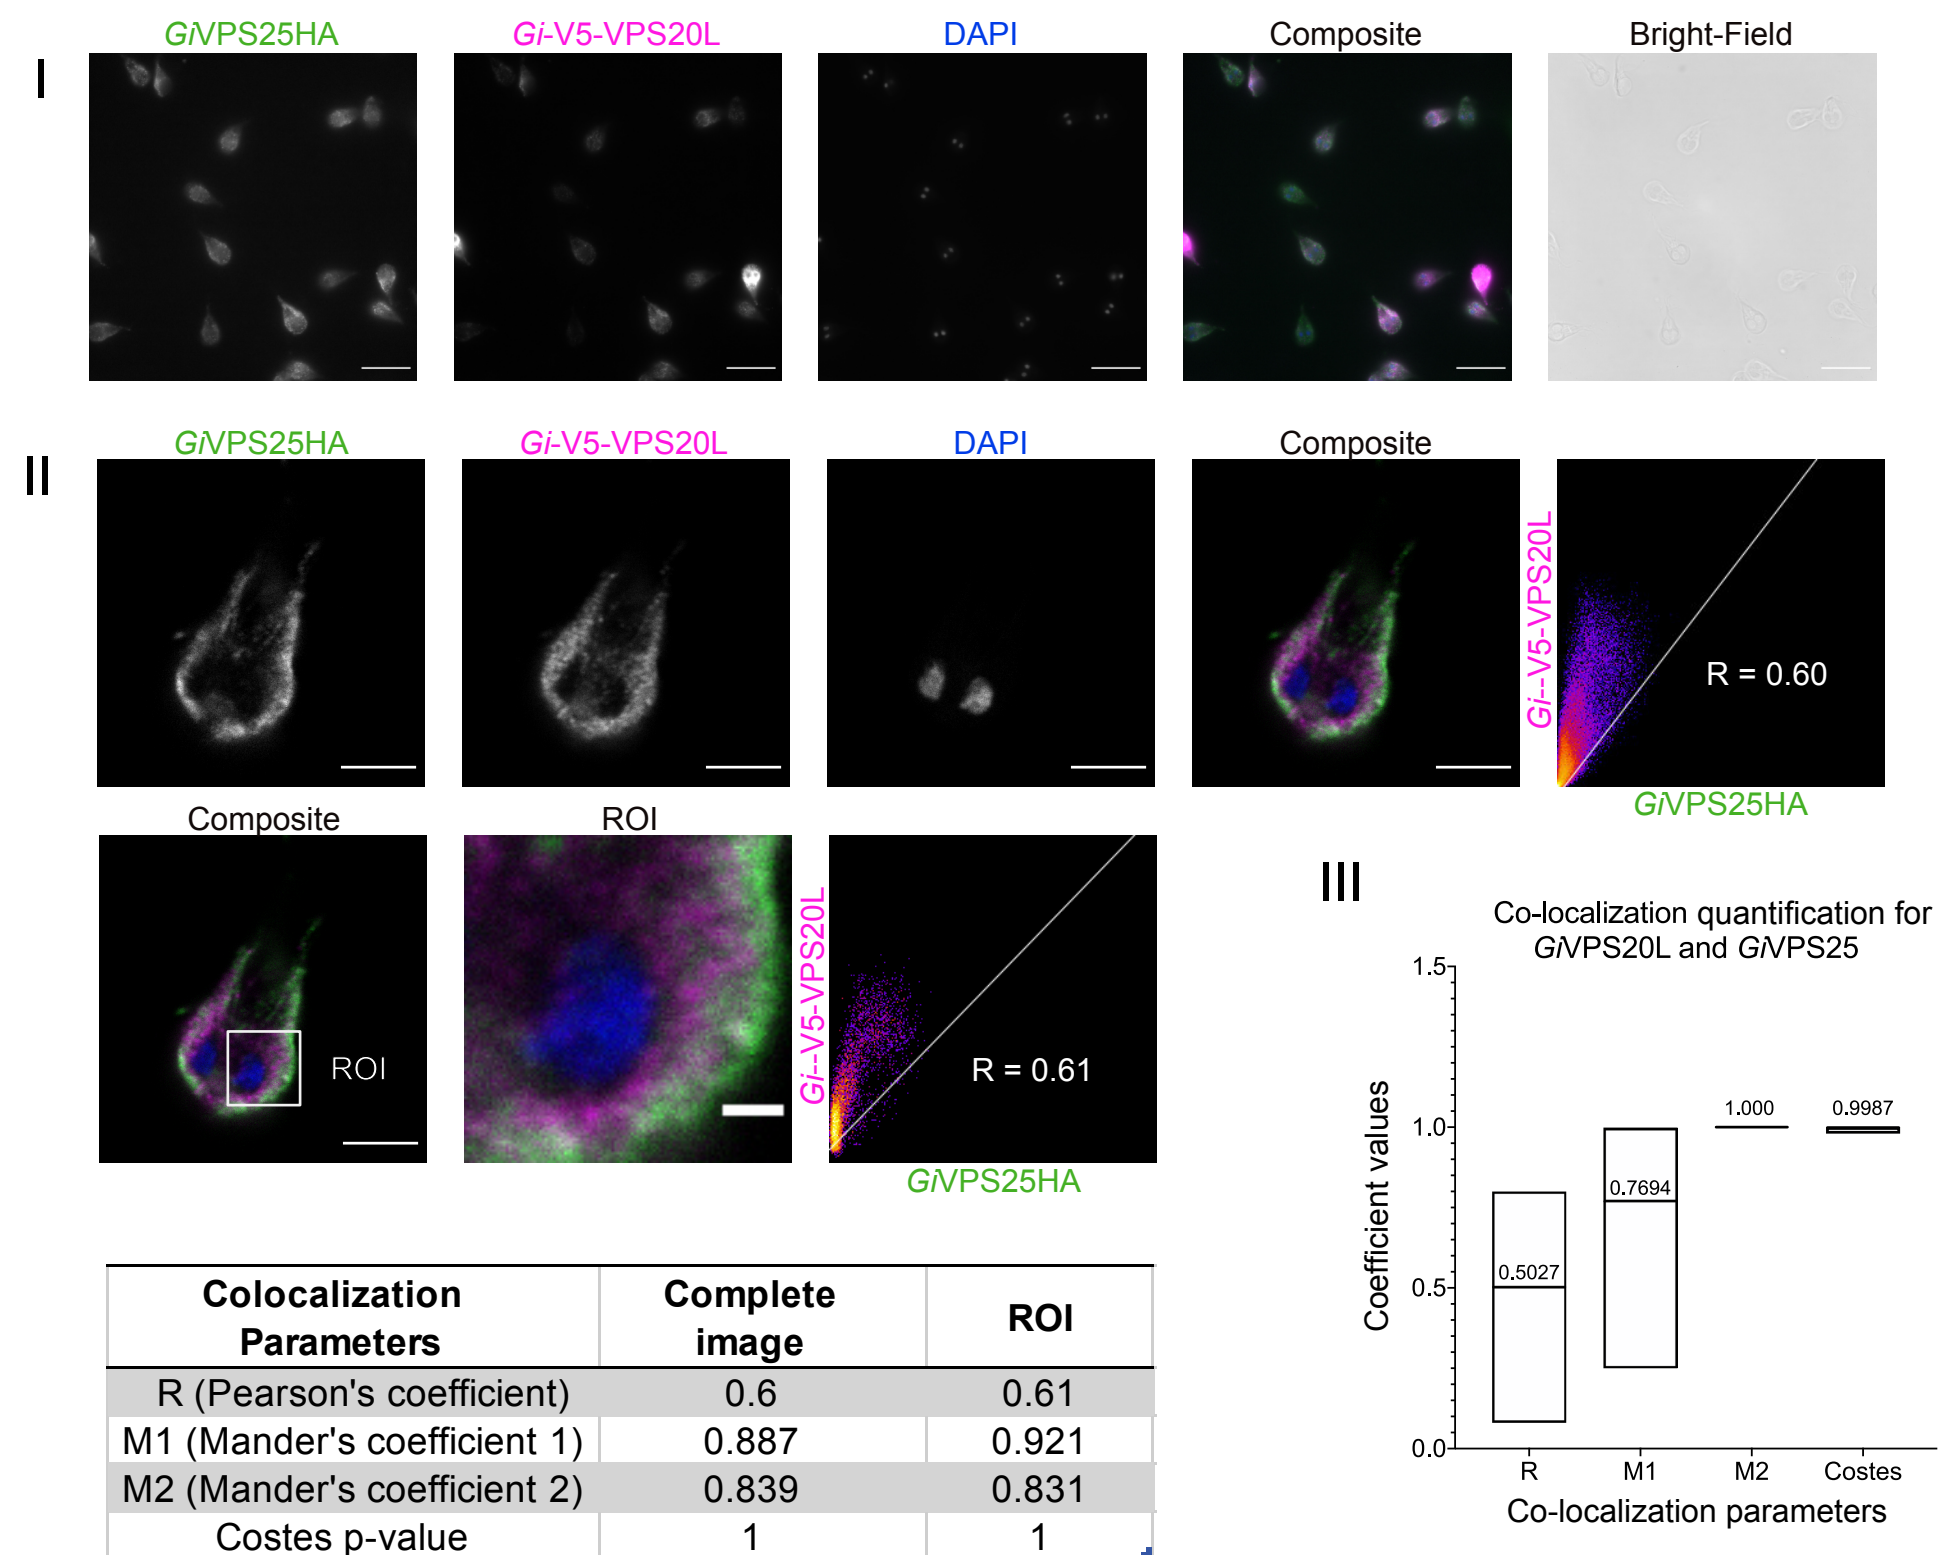

Figure 7

A

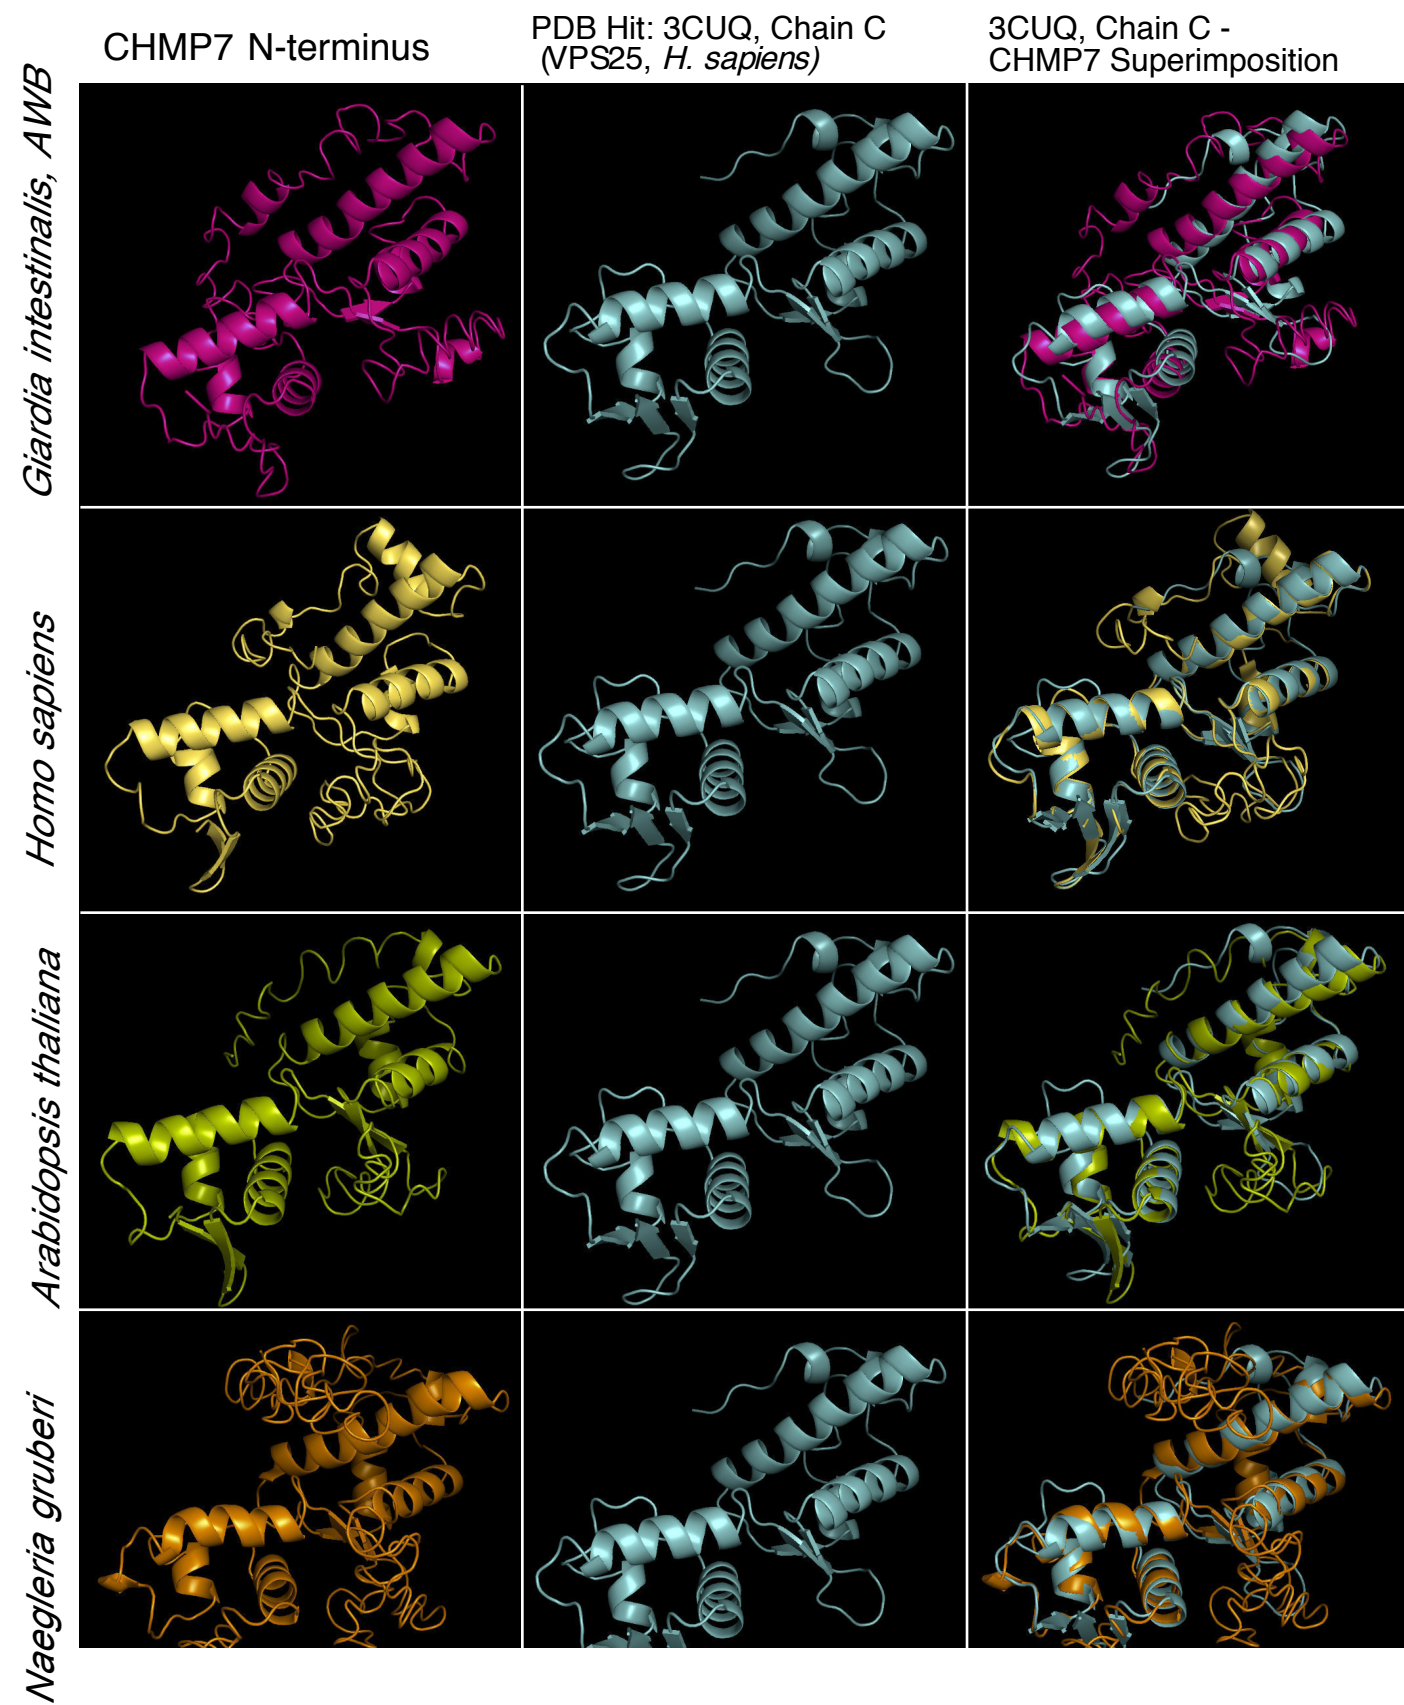

B

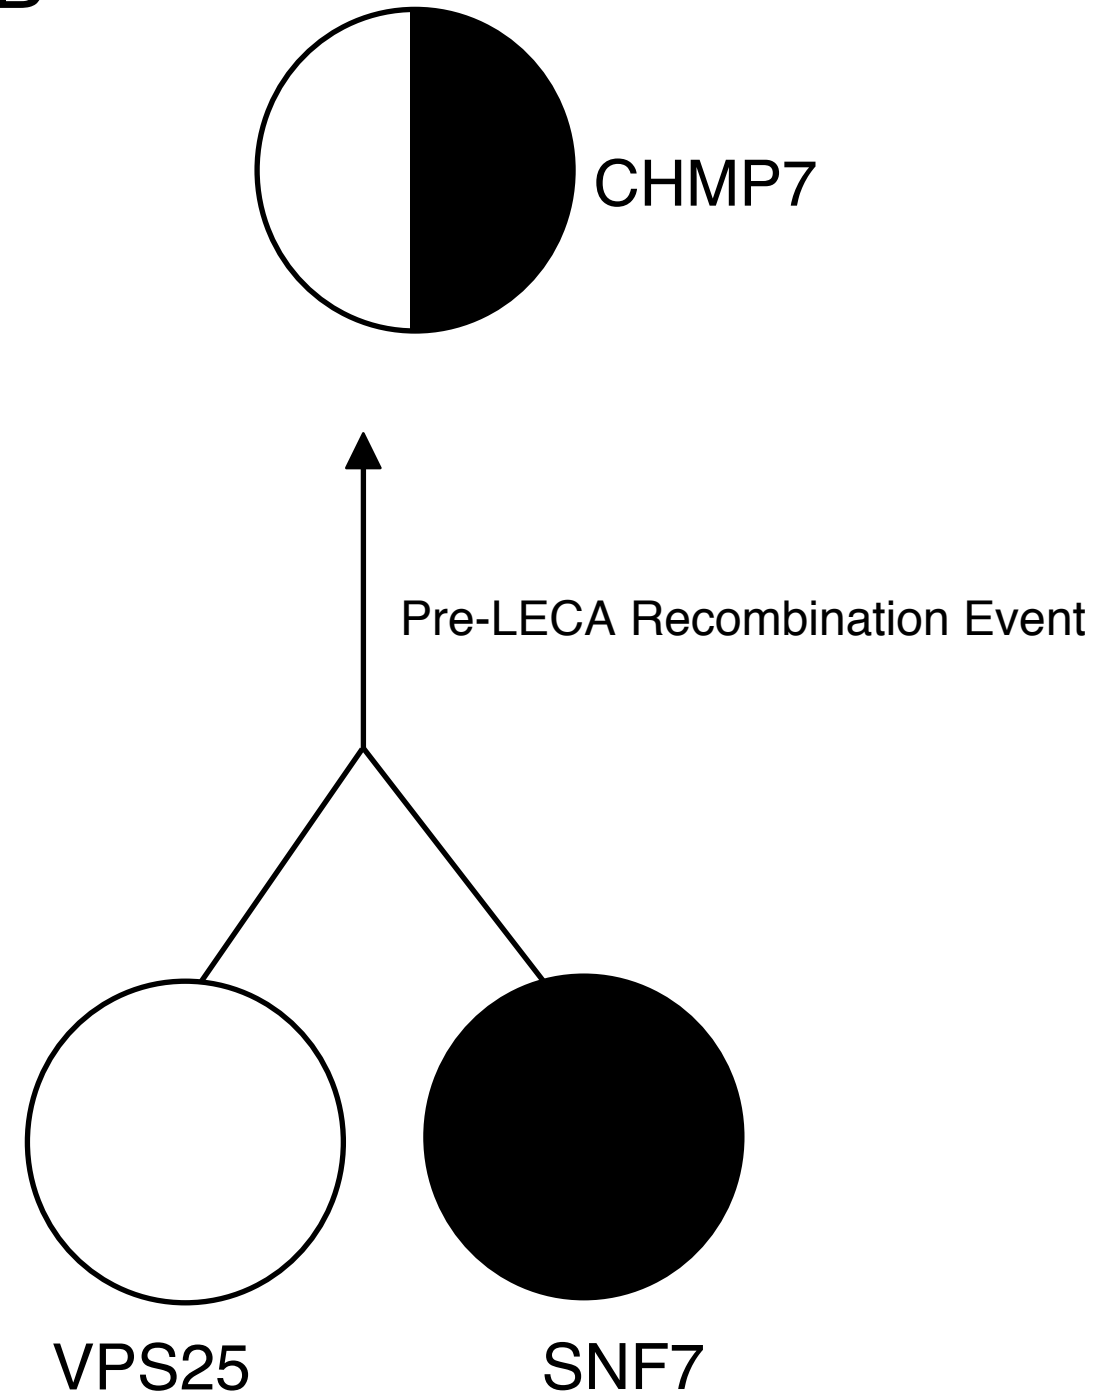



Figure 8

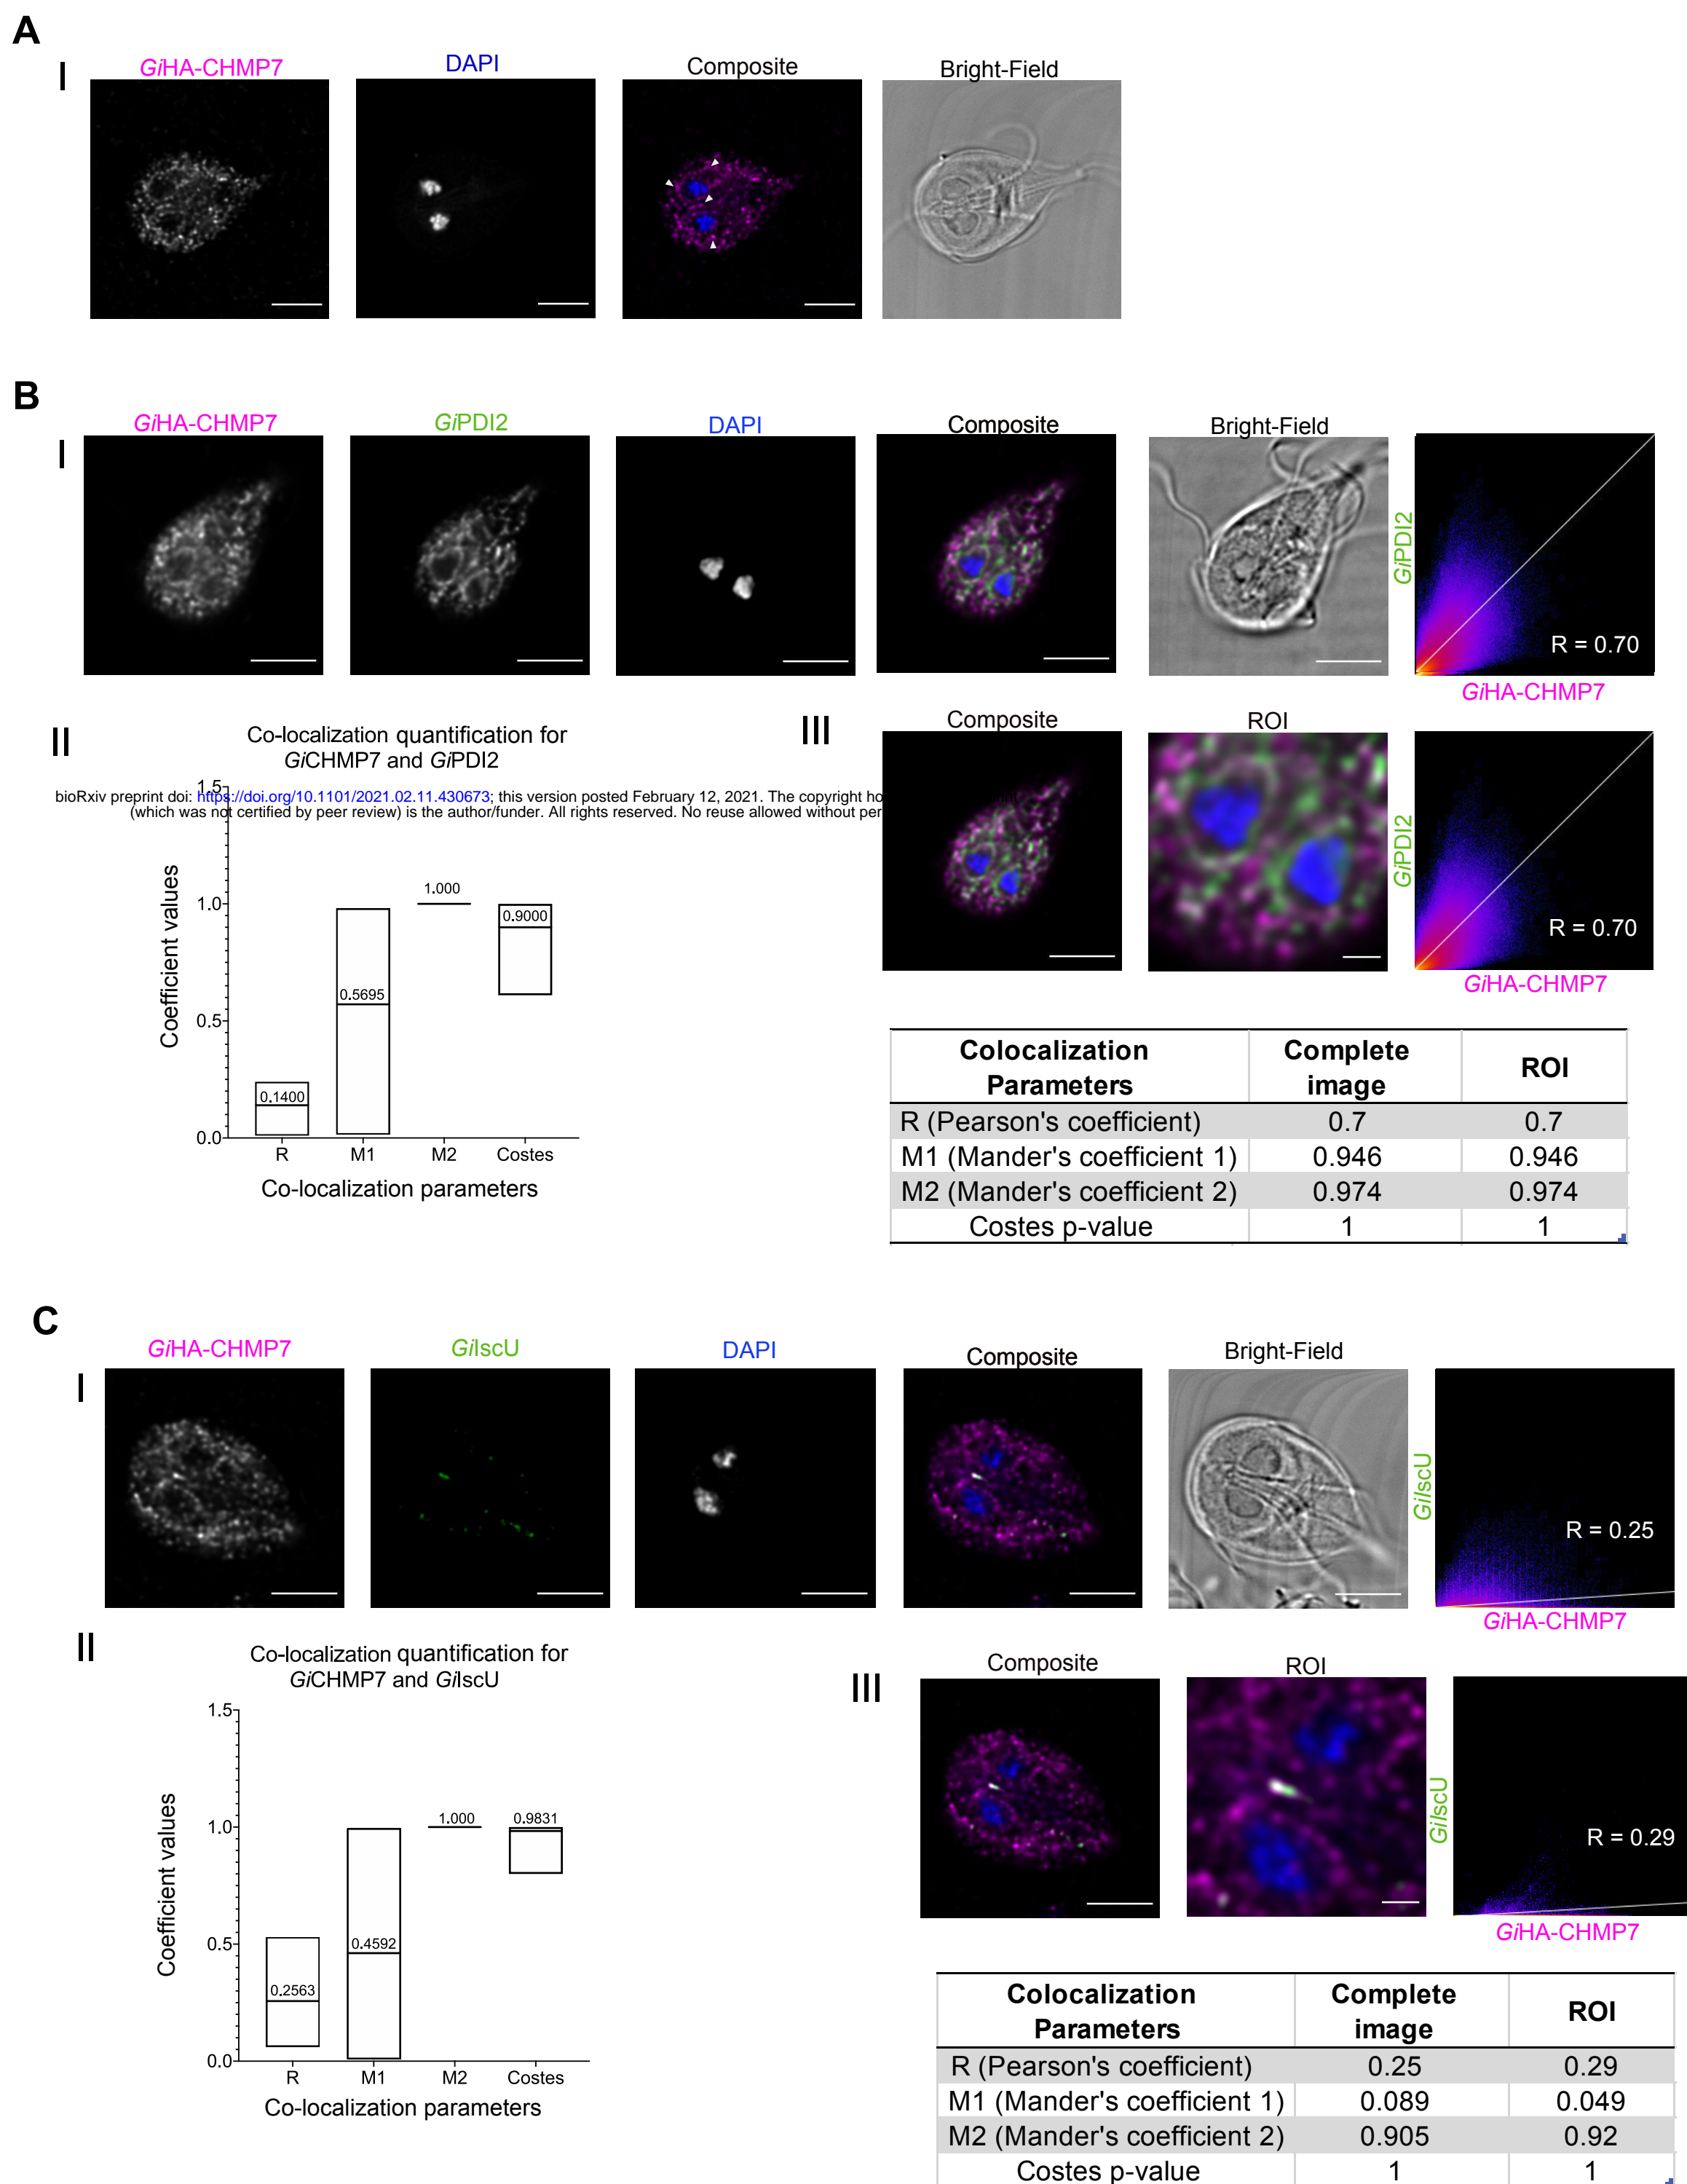

Figure 9

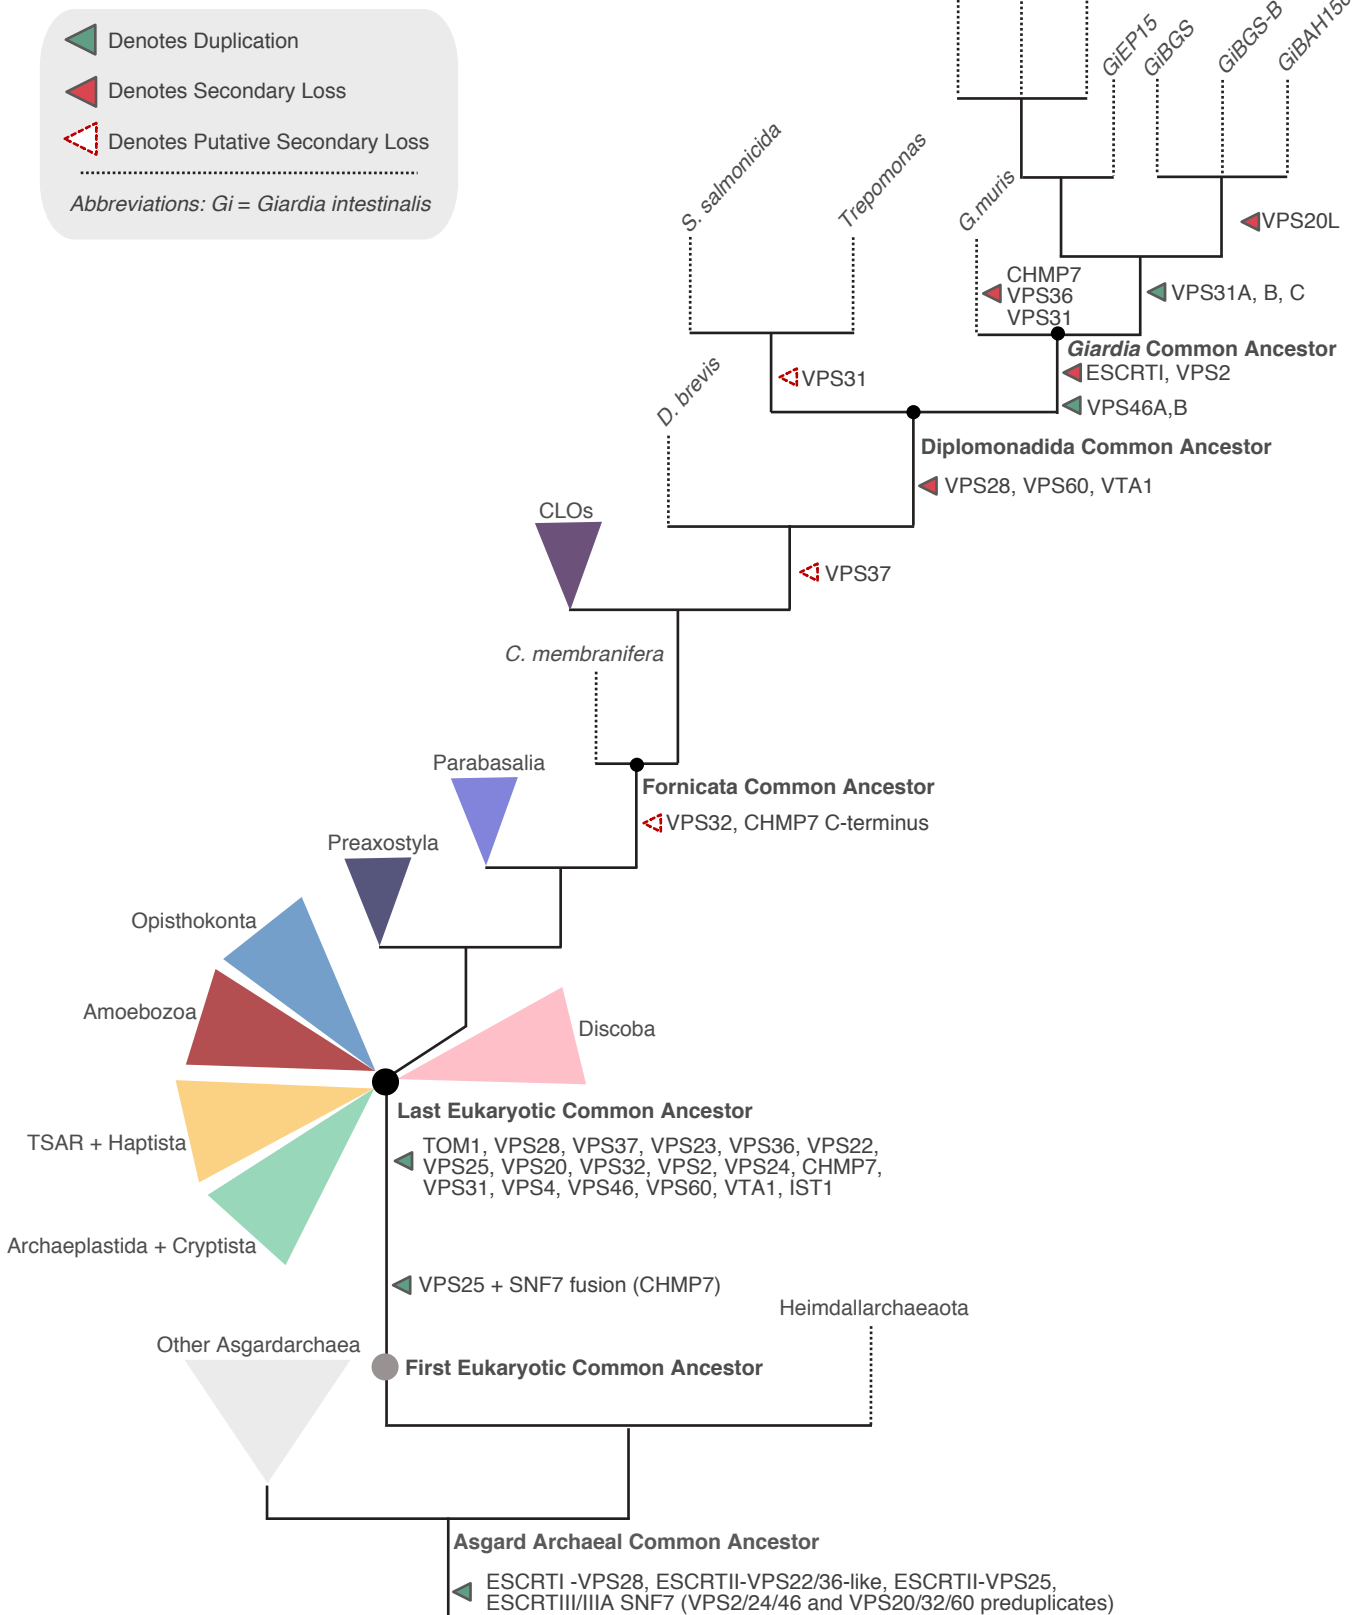



Supplementary Figure 1

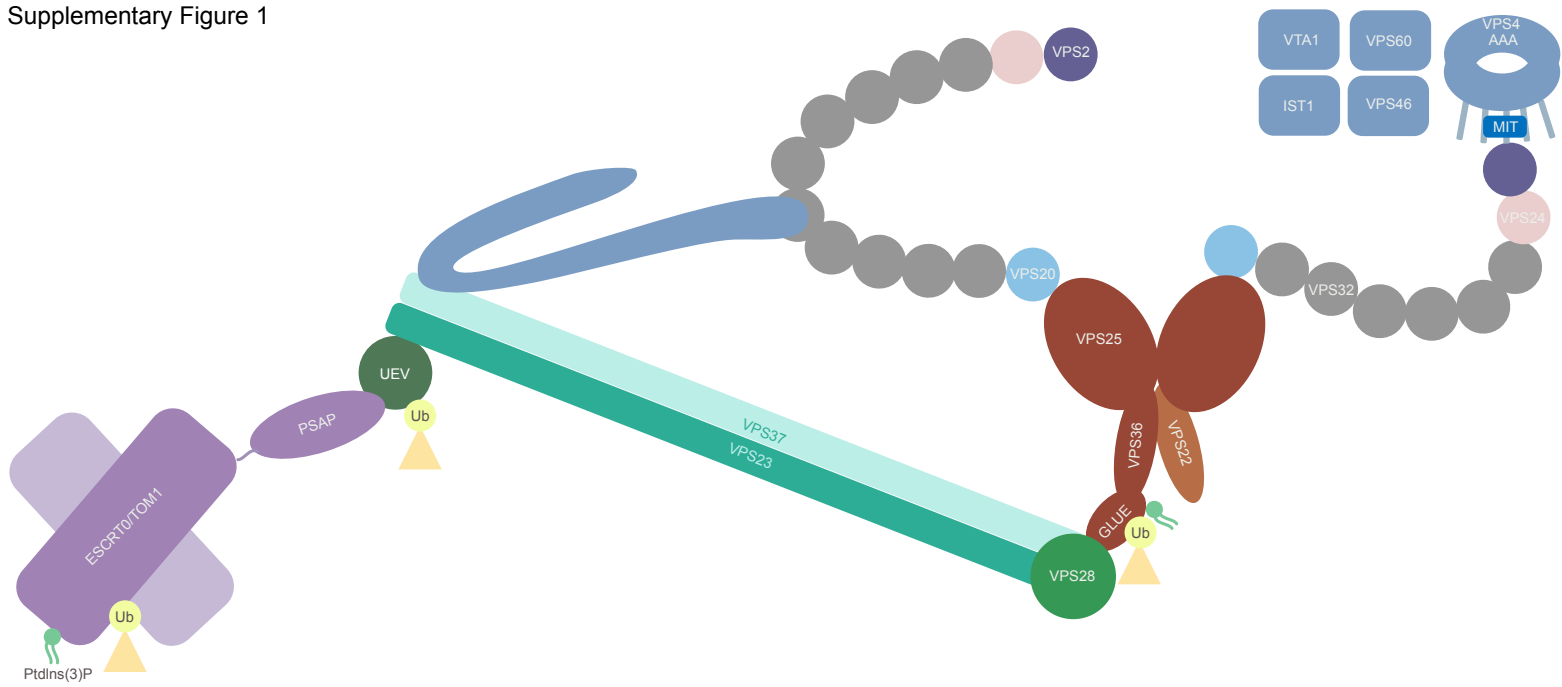

Supplementary Figure 2

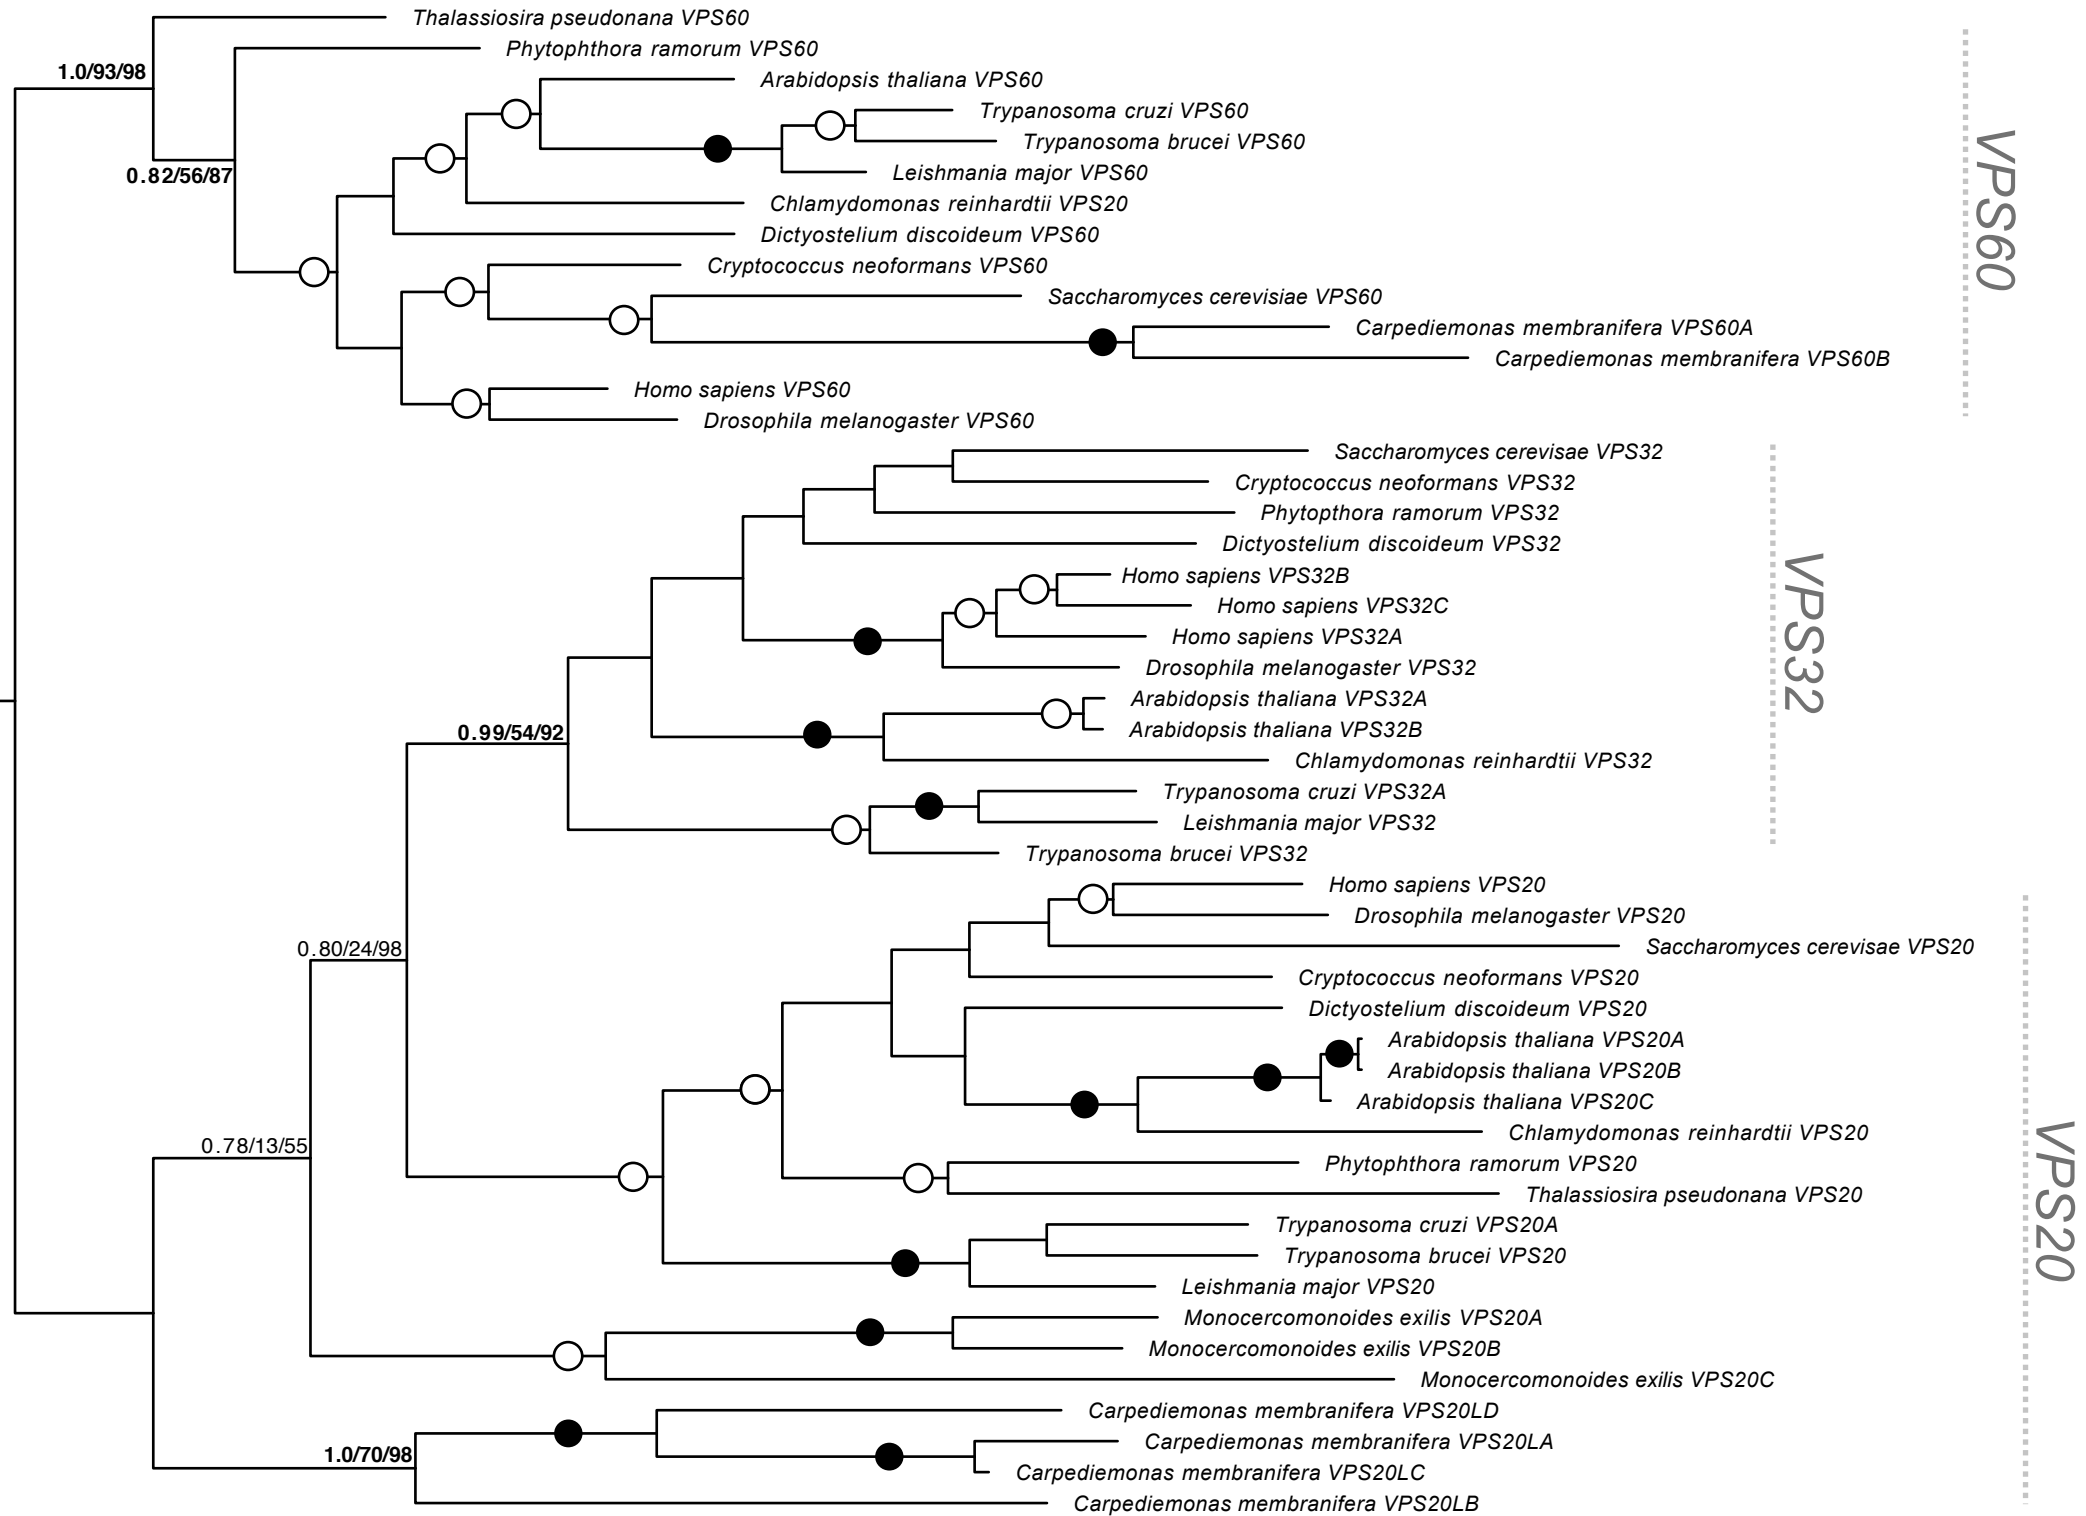

MRBAYES/RAXML/IQTREE

- $\geq 0.99/95/99$
- $\geq 0.95/75/97$
- $\geq 0.80/50/95$

Supplementary Figure 3

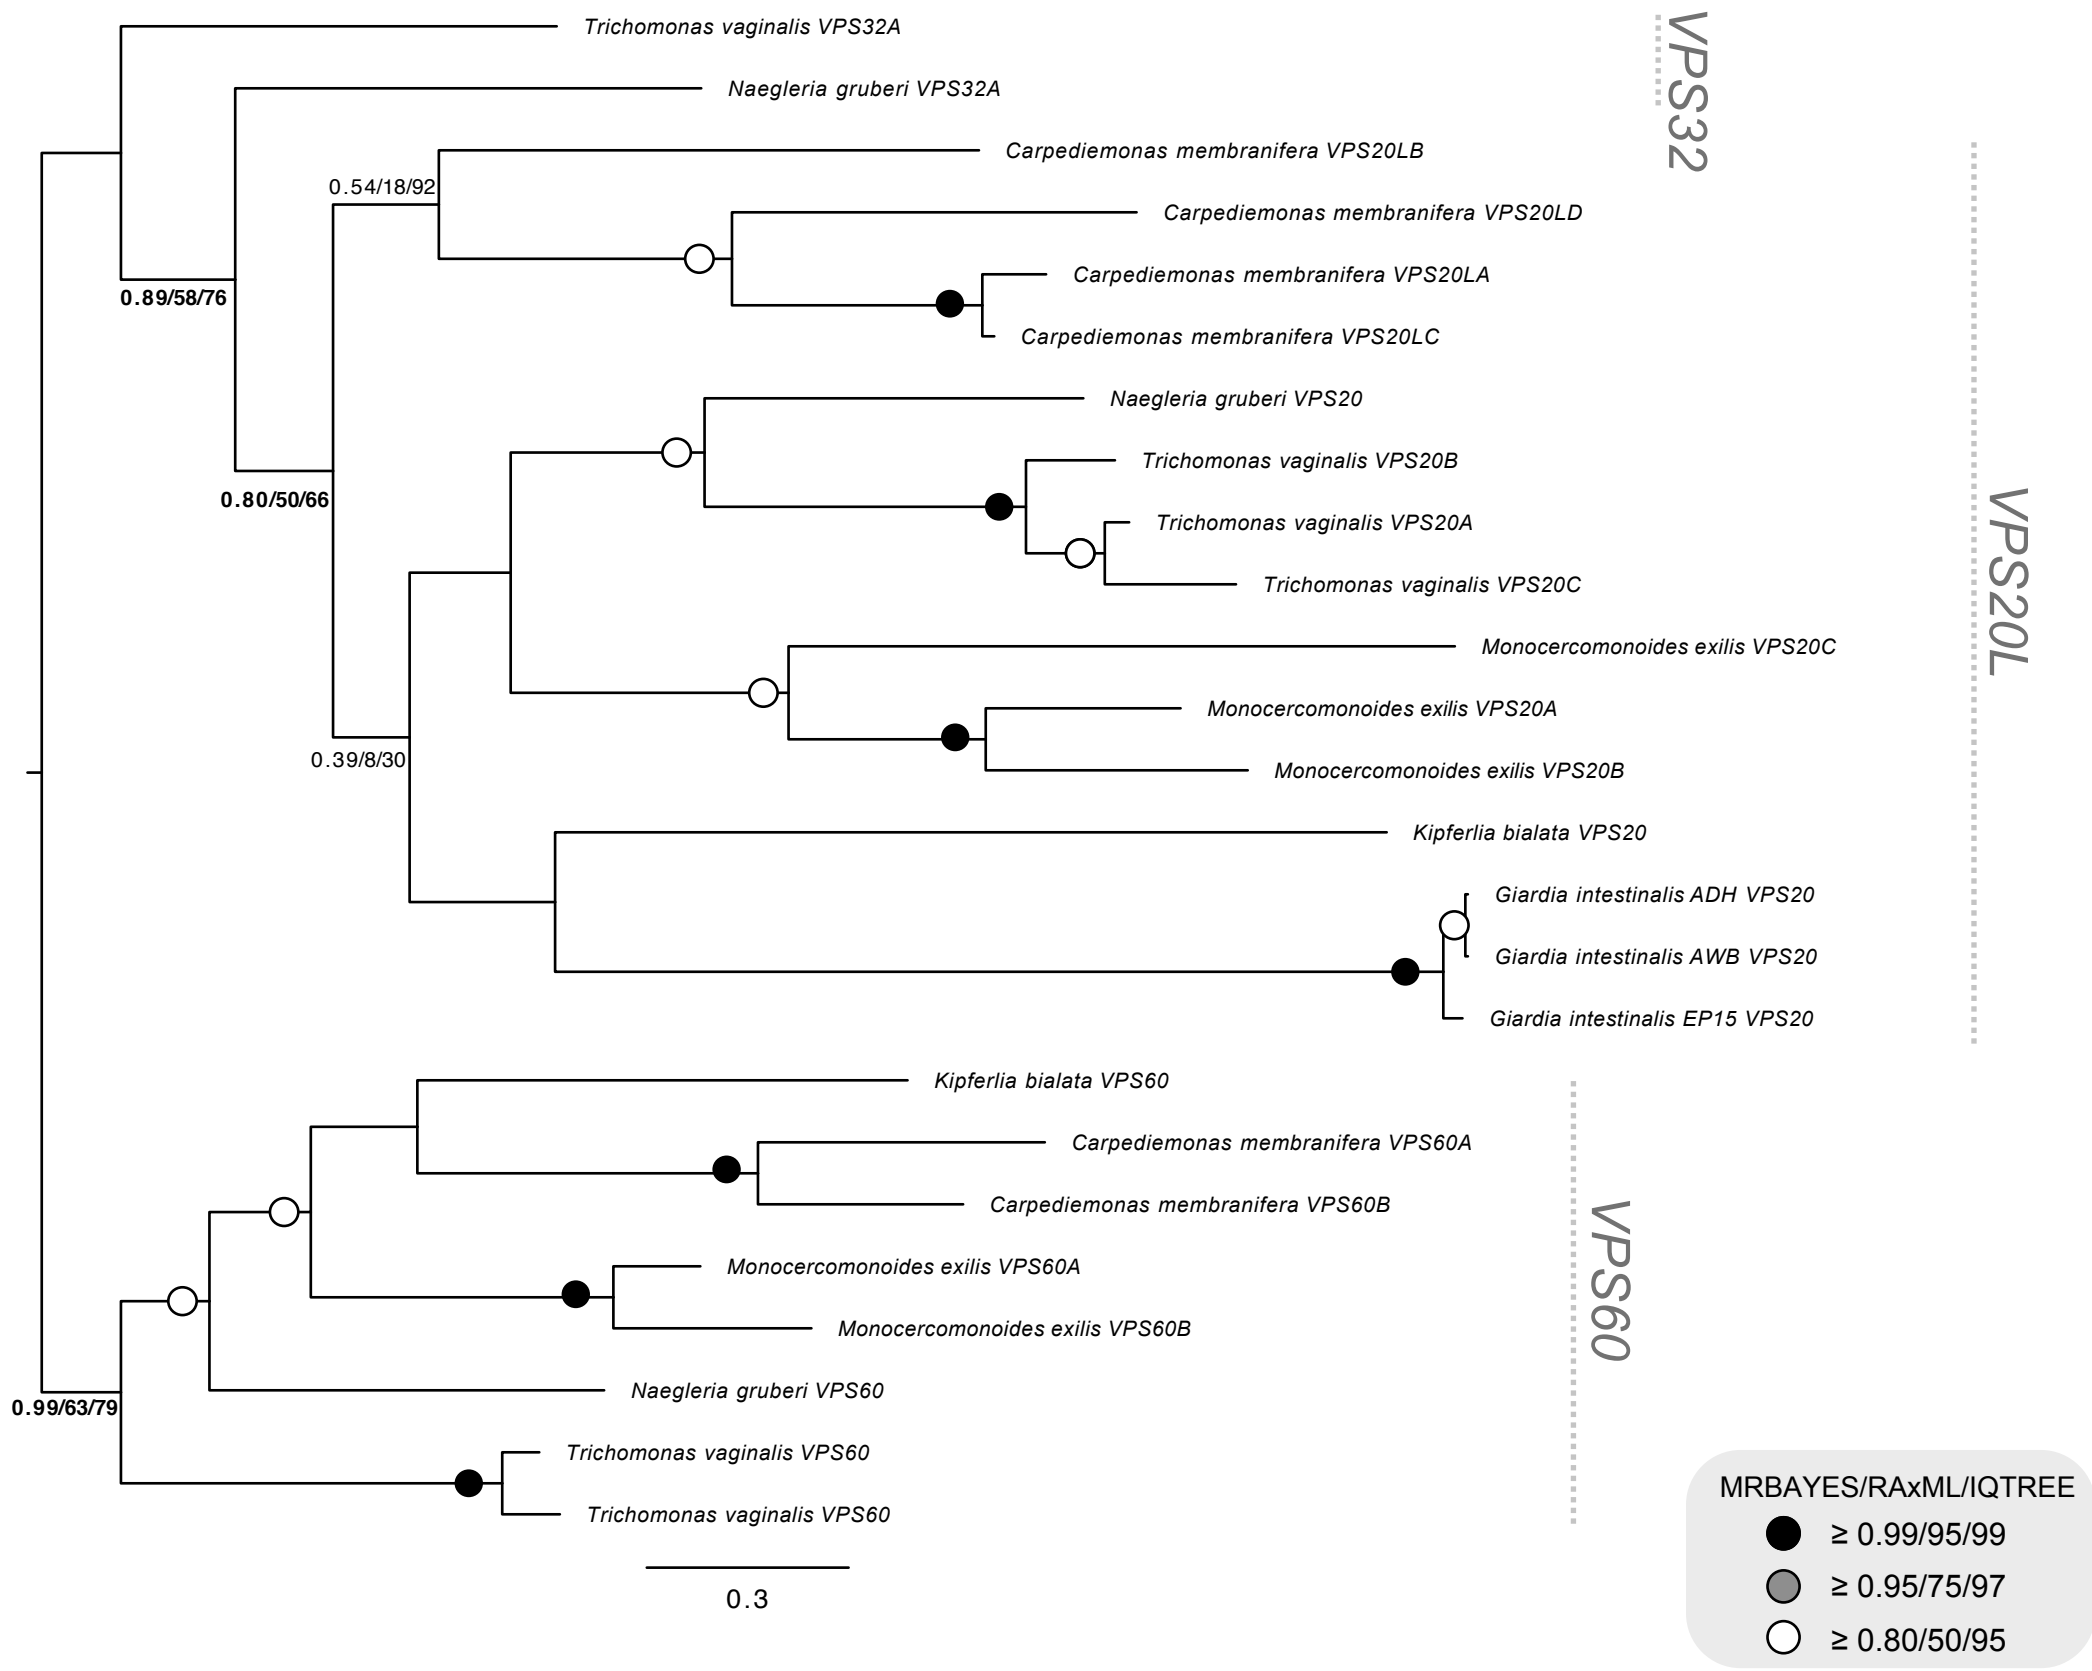

## Supplementary Figure 4

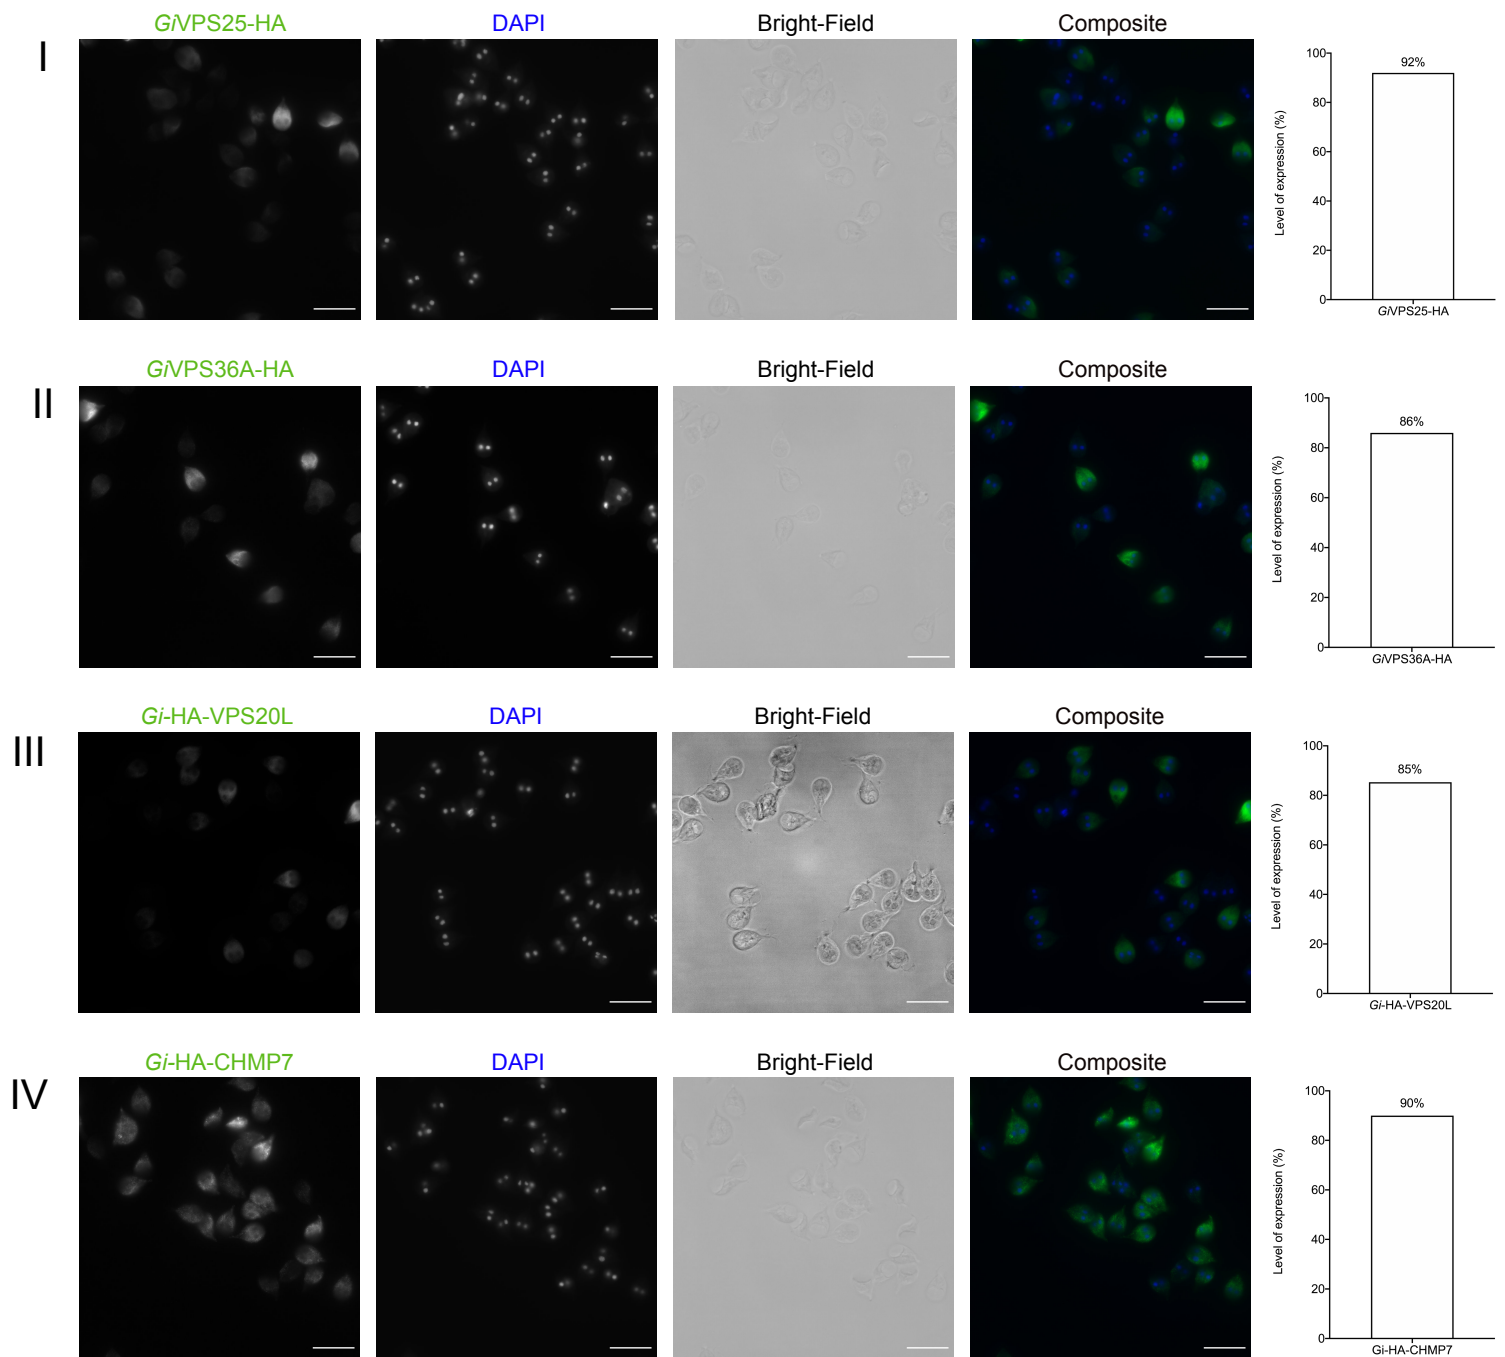

**V**

| Cell Line            | Cells Counted | Cells expressing | % of Expressing Cells |
|----------------------|---------------|------------------|-----------------------|
| <i>Gi</i> VPS25HA    | 267           | 245              | 92%                   |
| <i>Gi</i> VPS36A-HA  | 199           | 171              | 86%                   |
| <i>Gi</i> -HA-VPS20L | 334           | 285              | 85%                   |
| <i>Gi</i> -HA-CHMP7  | 470           | 423              | 90%                   |

Supplementary Figure 5

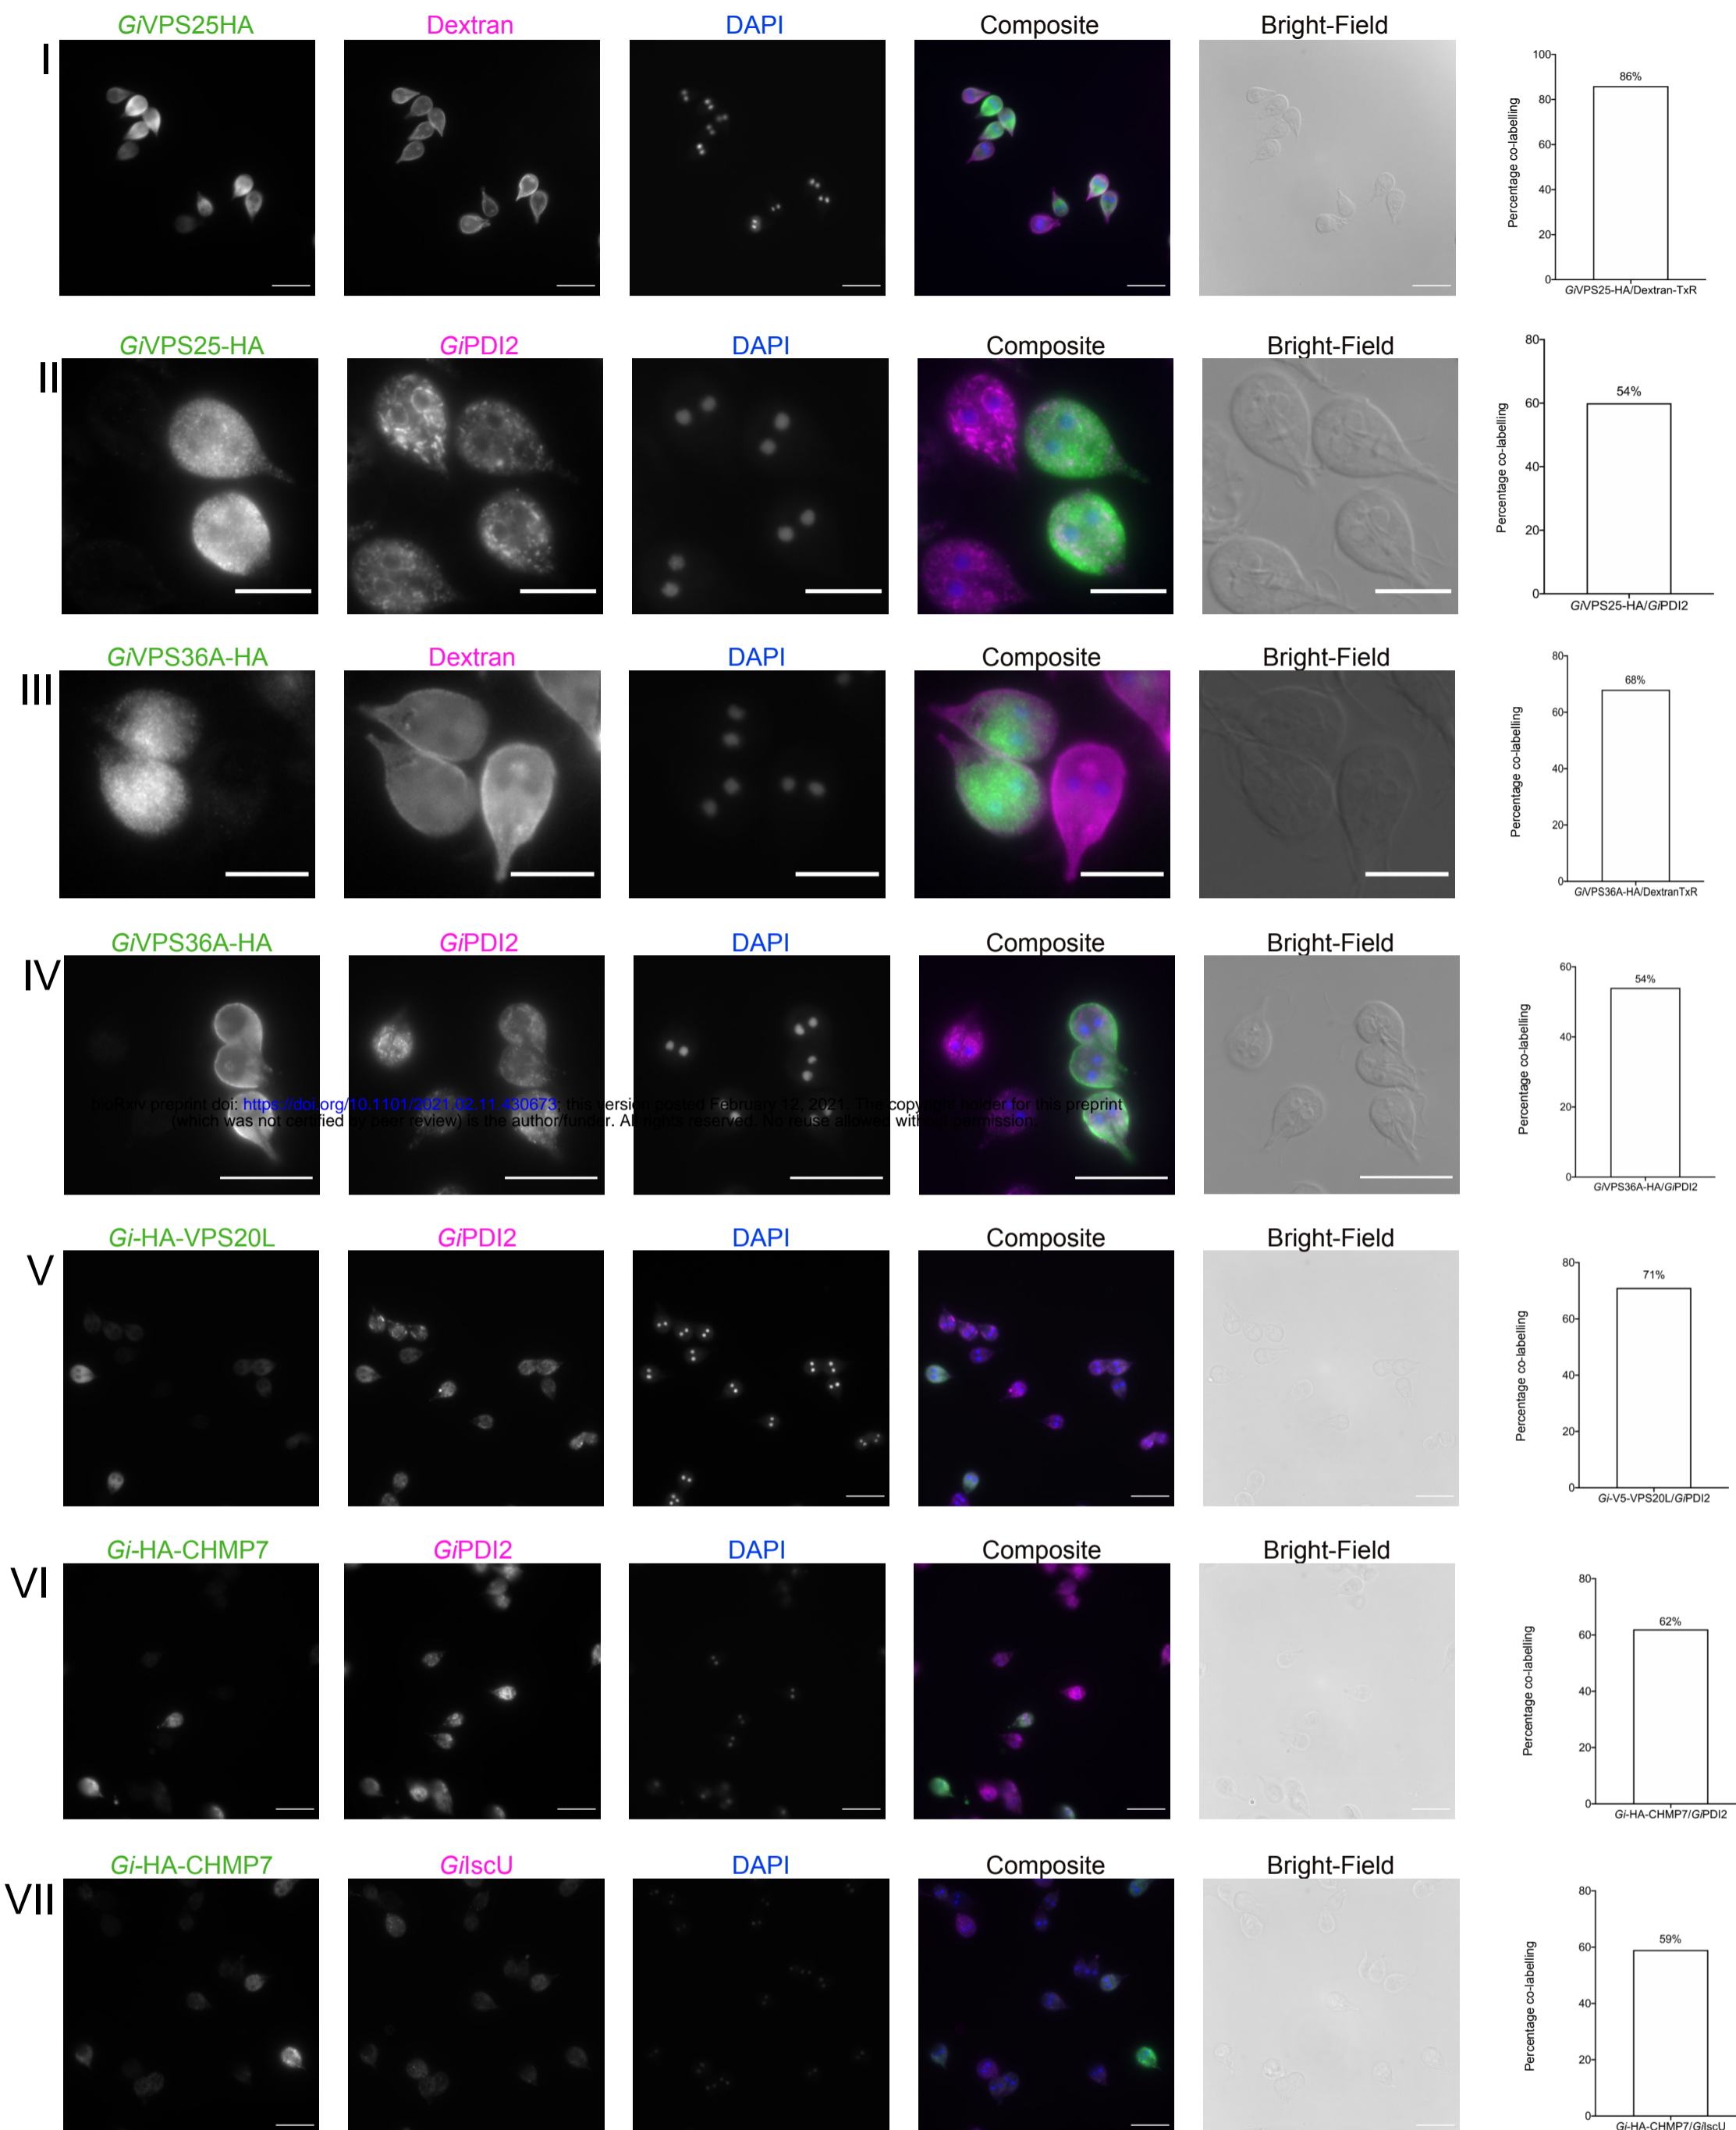

**VIII**

| Cell Line/Condition                  | Cells Counted | Cells with Signal Overlap | % of Expressing Cells |
|--------------------------------------|---------------|---------------------------|-----------------------|
| <i>Gi</i> VPS25HA/DextranTxR         | 108           | 93                        | 86%                   |
| <i>Gi</i> VPS25HA/ <i>Gi</i> PDI2    | 53            | 32                        | 60%                   |
| <i>Gi</i> VPS36A-HA/DextranTxR       | 117           | 79                        | 68%                   |
| <i>Gi</i> VPS36A-HA/ <i>Gi</i> PDI2  | 94            | 51                        | 54%                   |
| <i>Gi</i> -HA-VPS20L/ <i>Gi</i> PDI2 | 104           | 74                        | 71%                   |
| <i>Gi</i> -HA-CHMP7/ <i>Gi</i> PDI2  | 112           | 69                        | 62%                   |
| <i>Gi</i> -HA-CHMP7/ <i>Gi</i> lscU  | 102           | 60                        | 59%                   |

Supplementary Figure 6

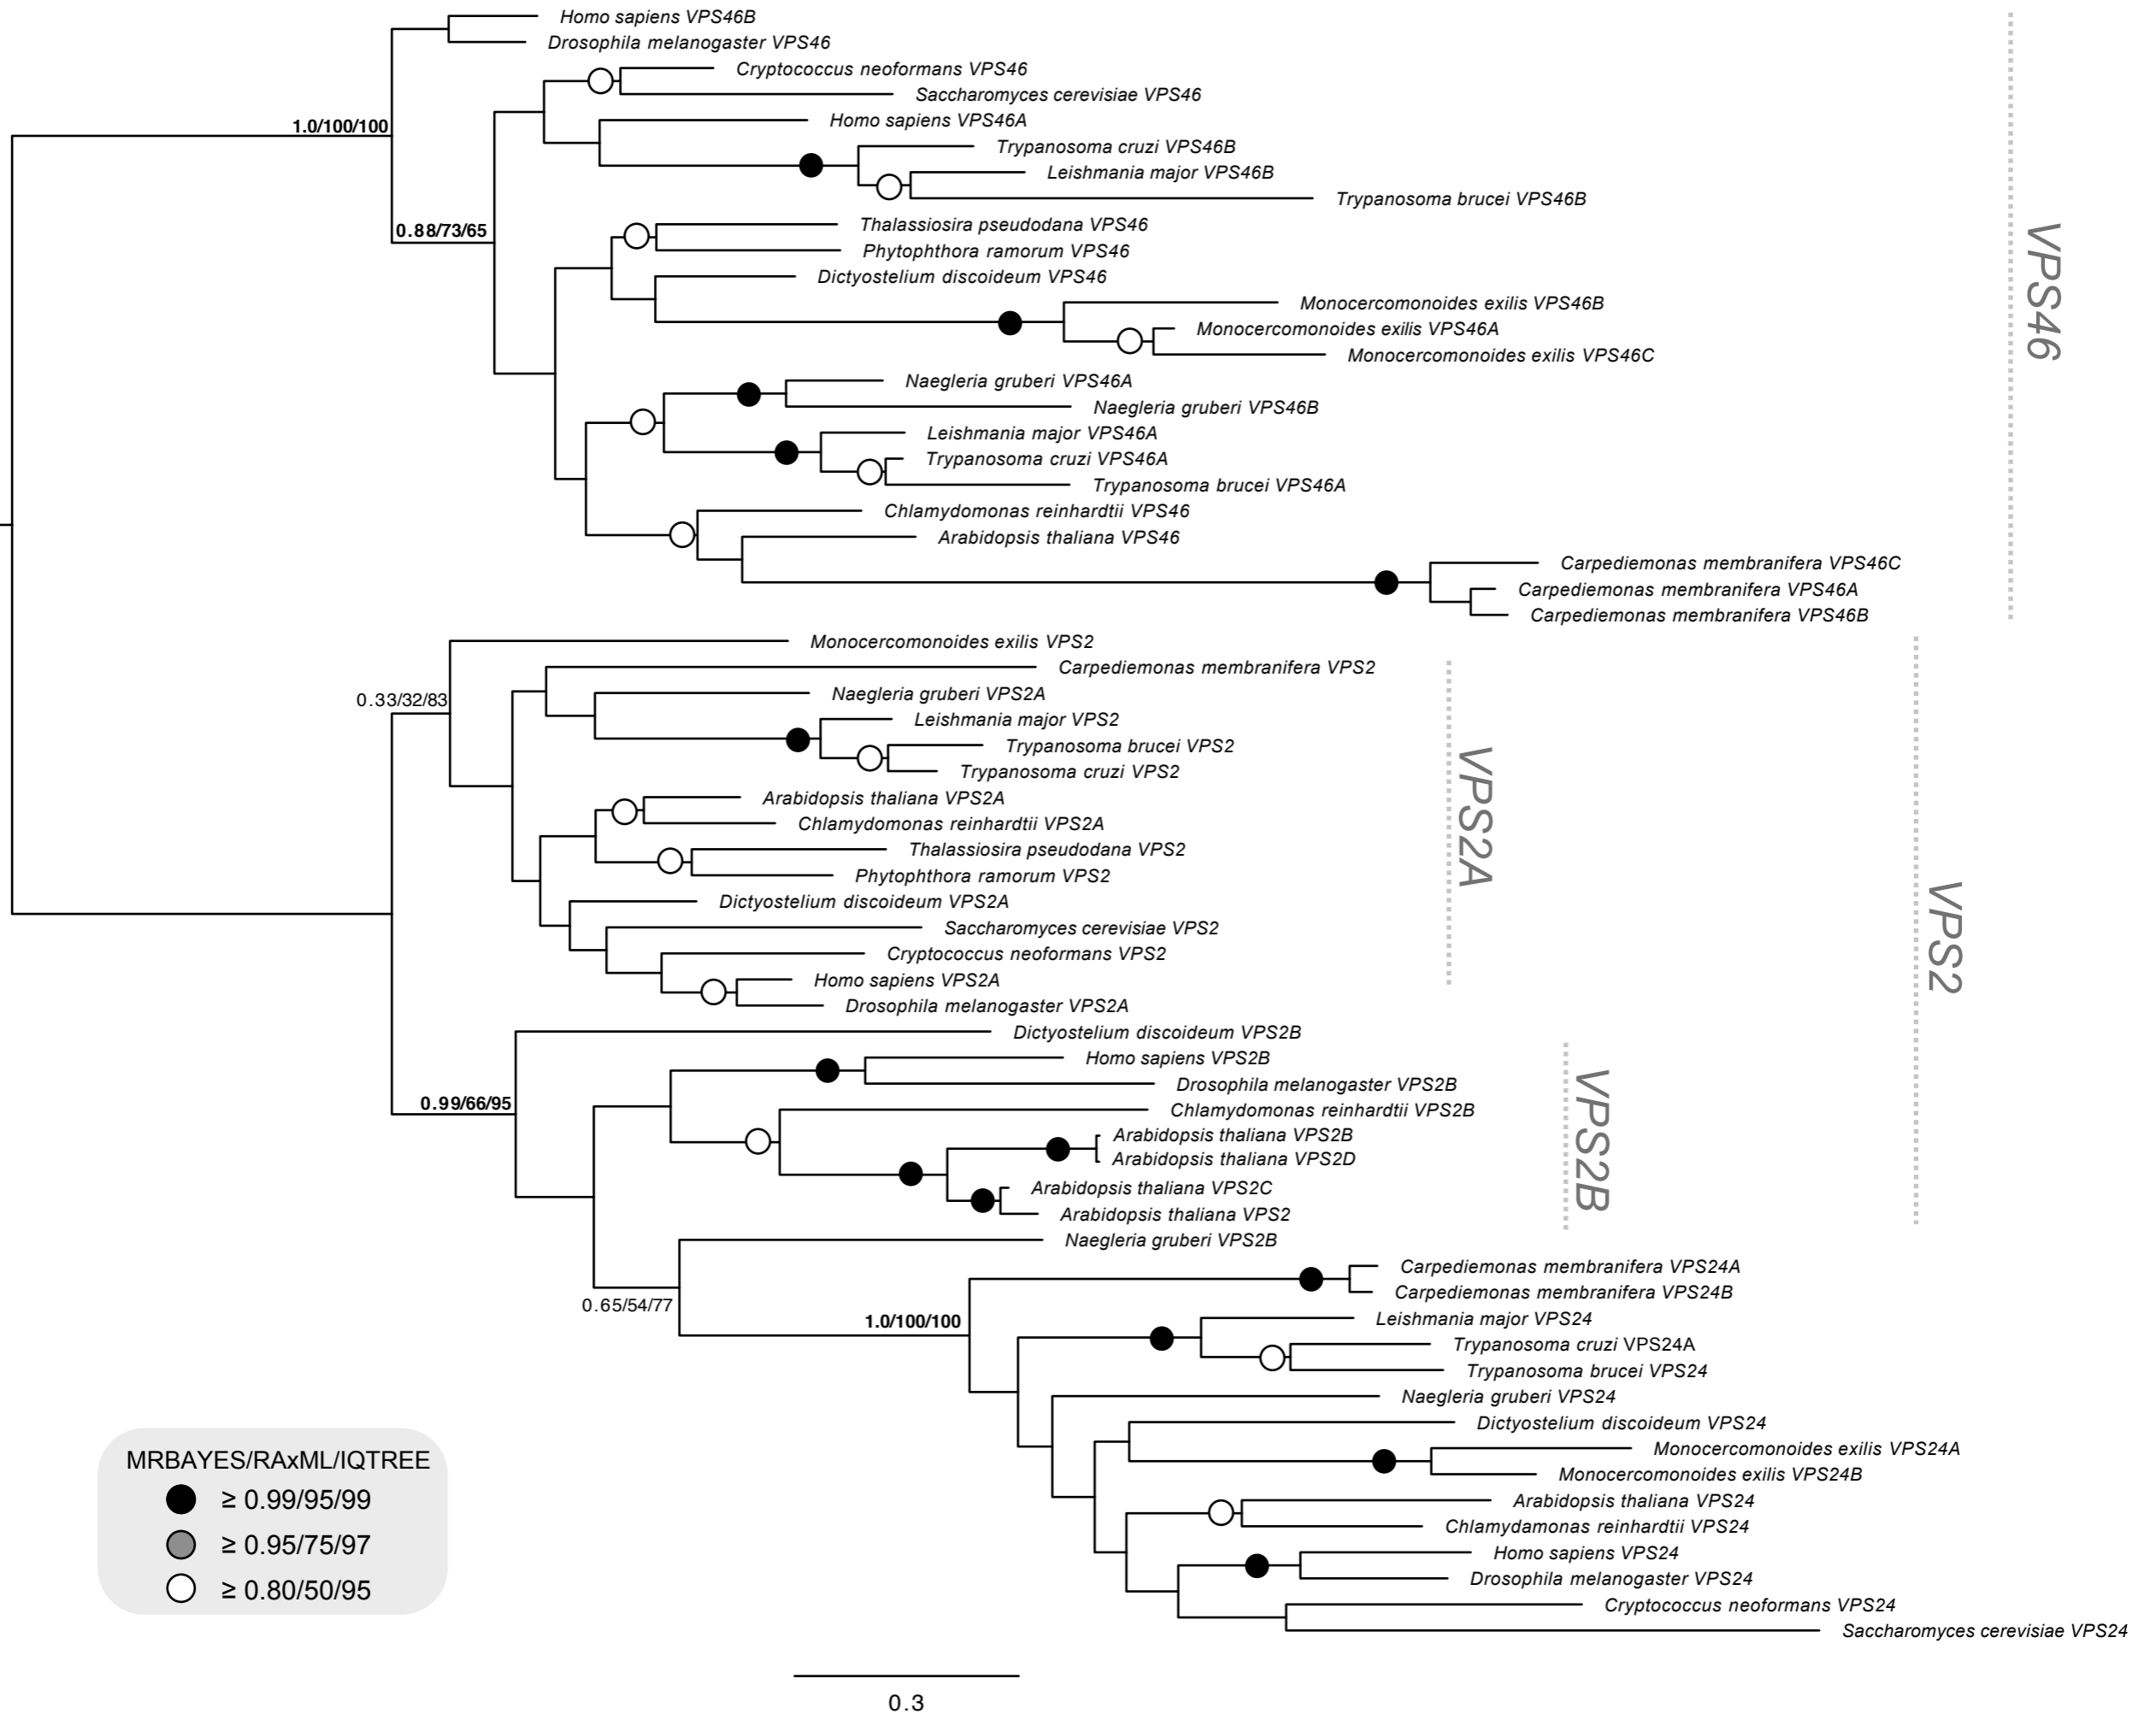



Supplementary Figure 7

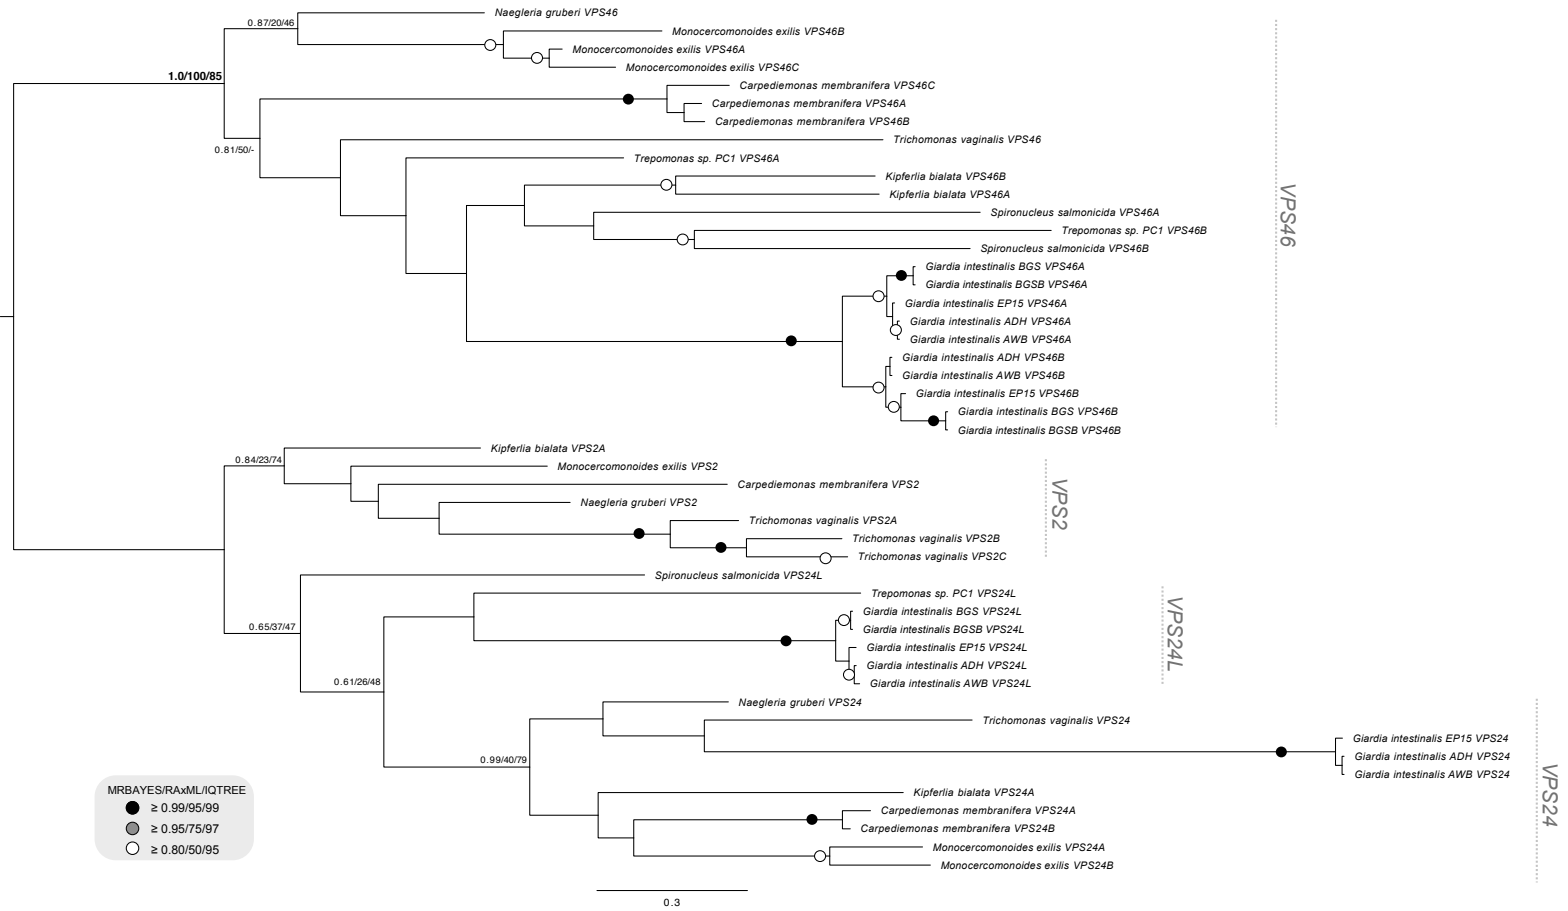

Supplementary Figure 8

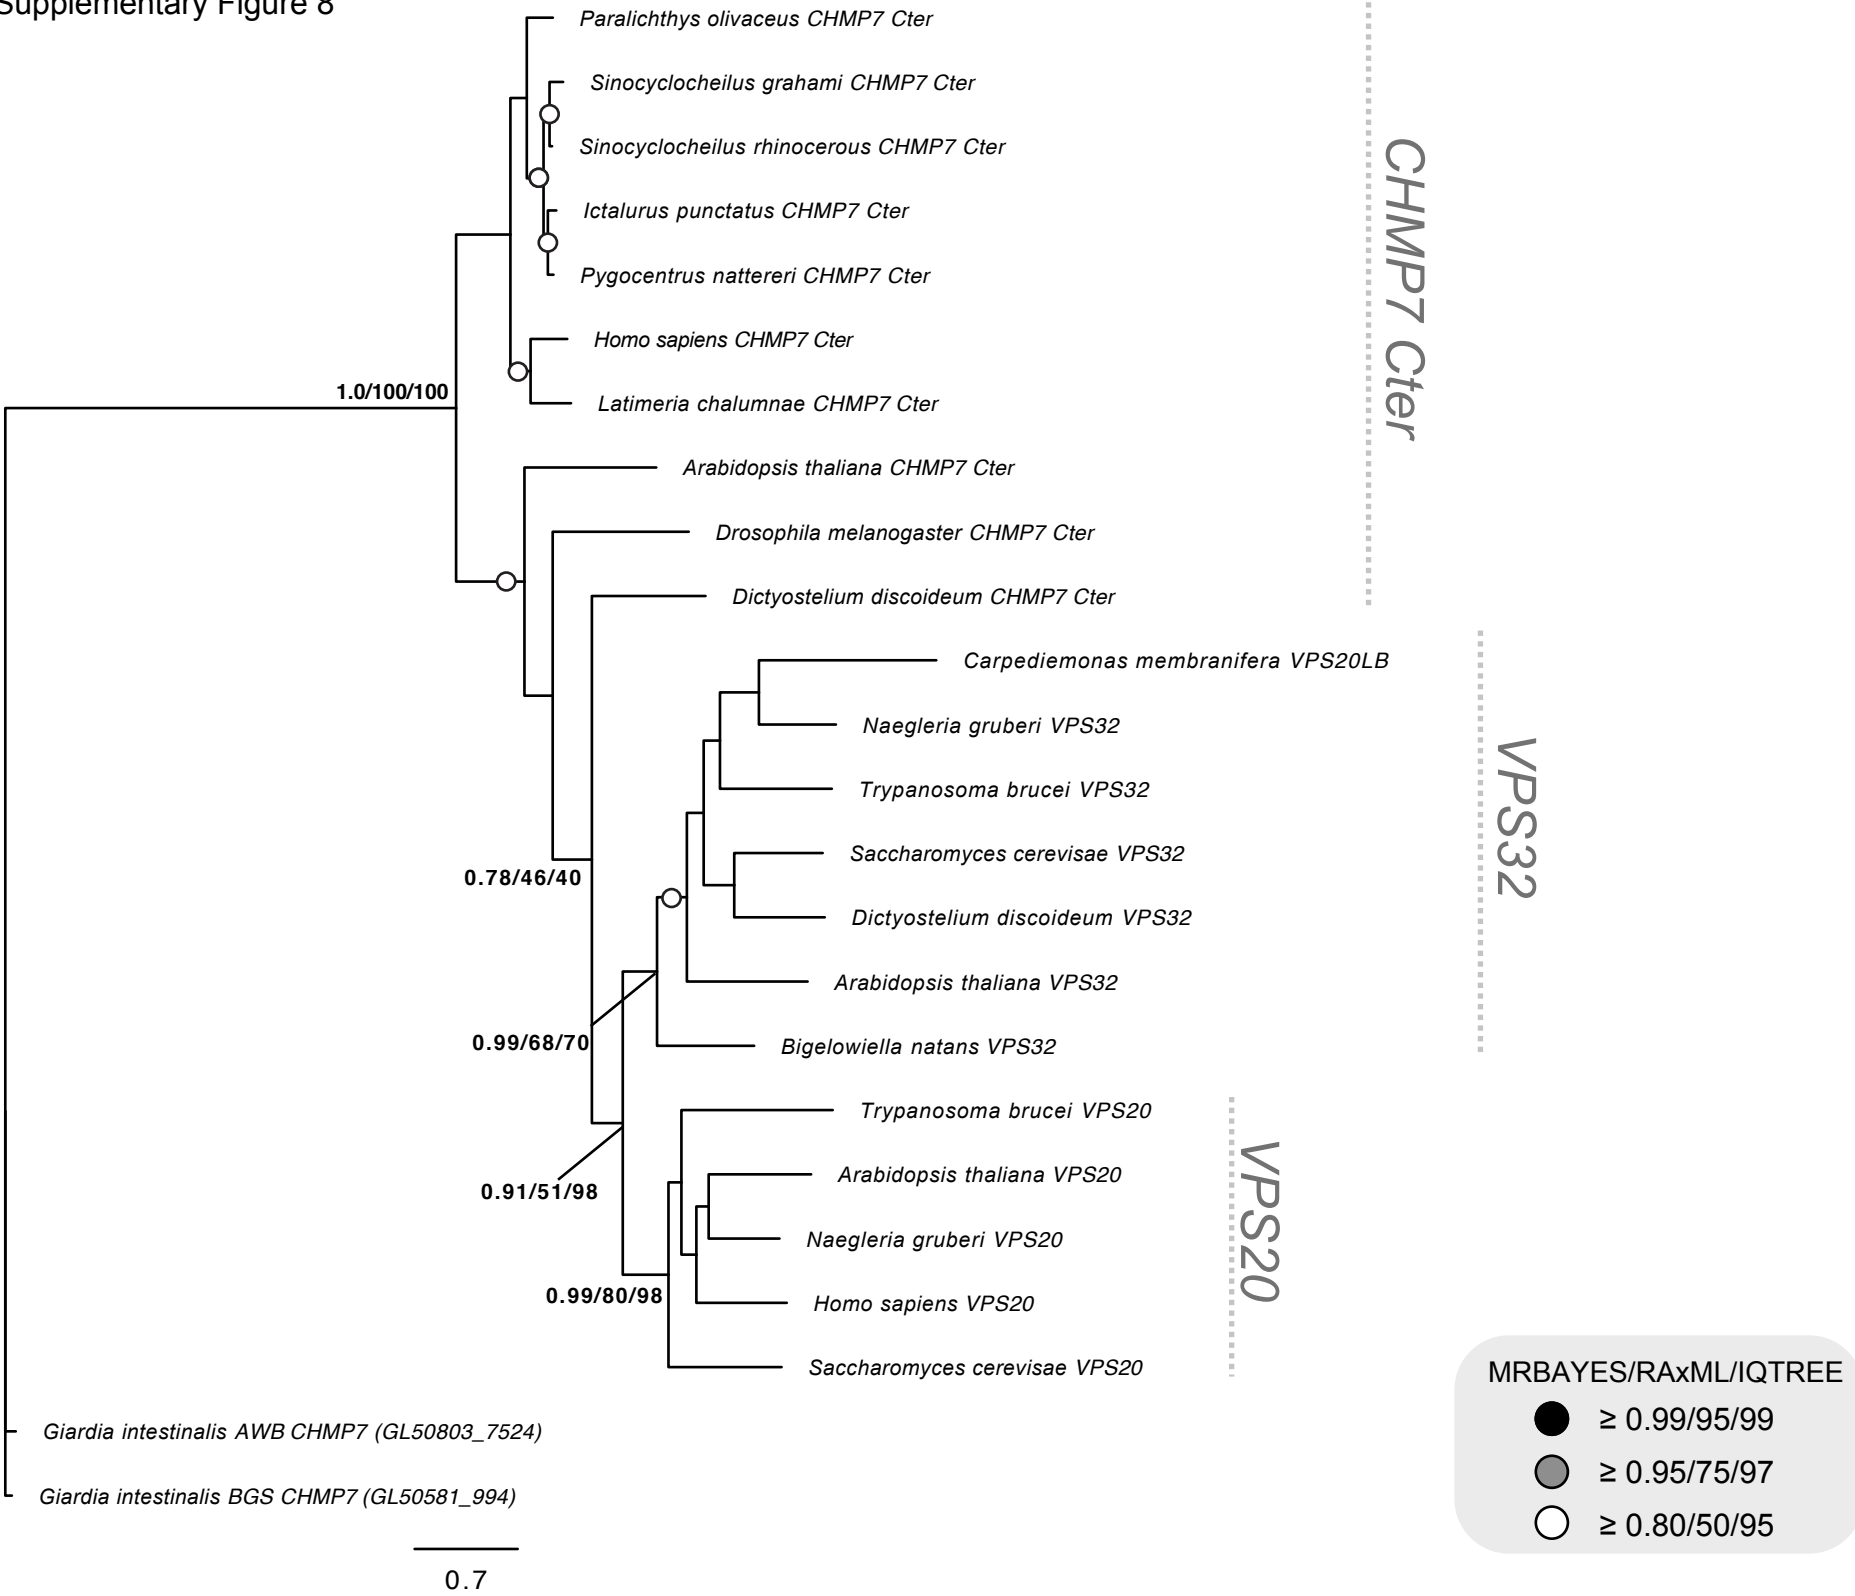

Supplementary Figure 9

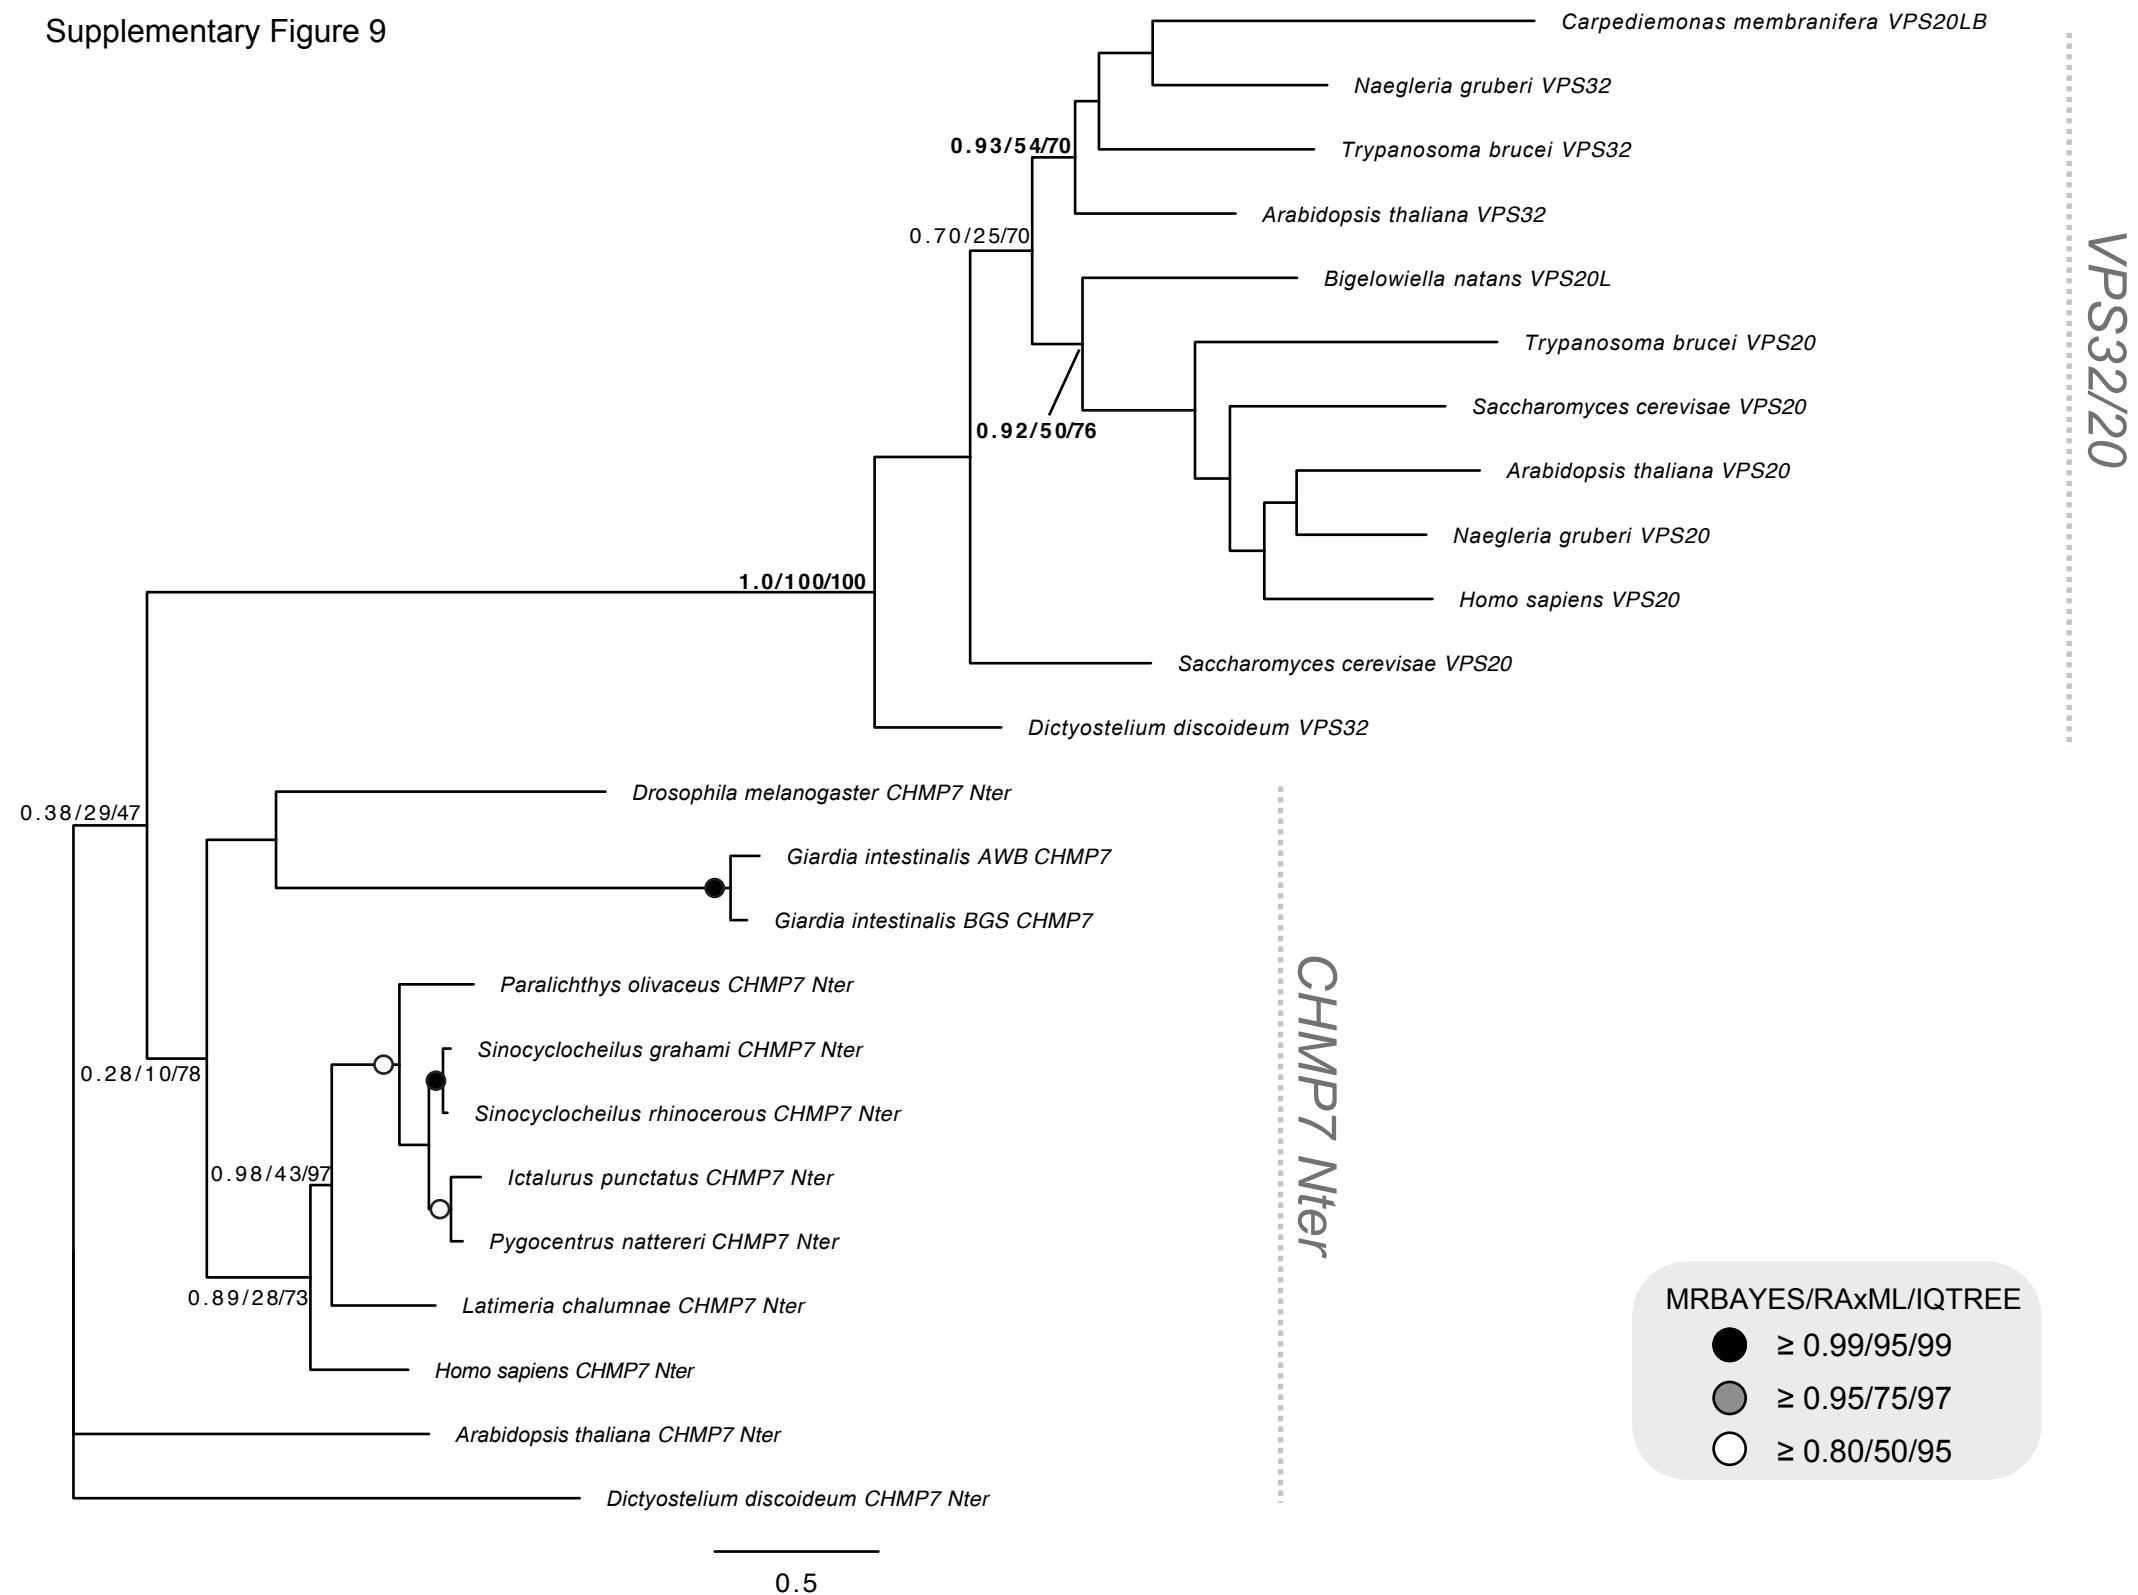

Supplementary Figure 10

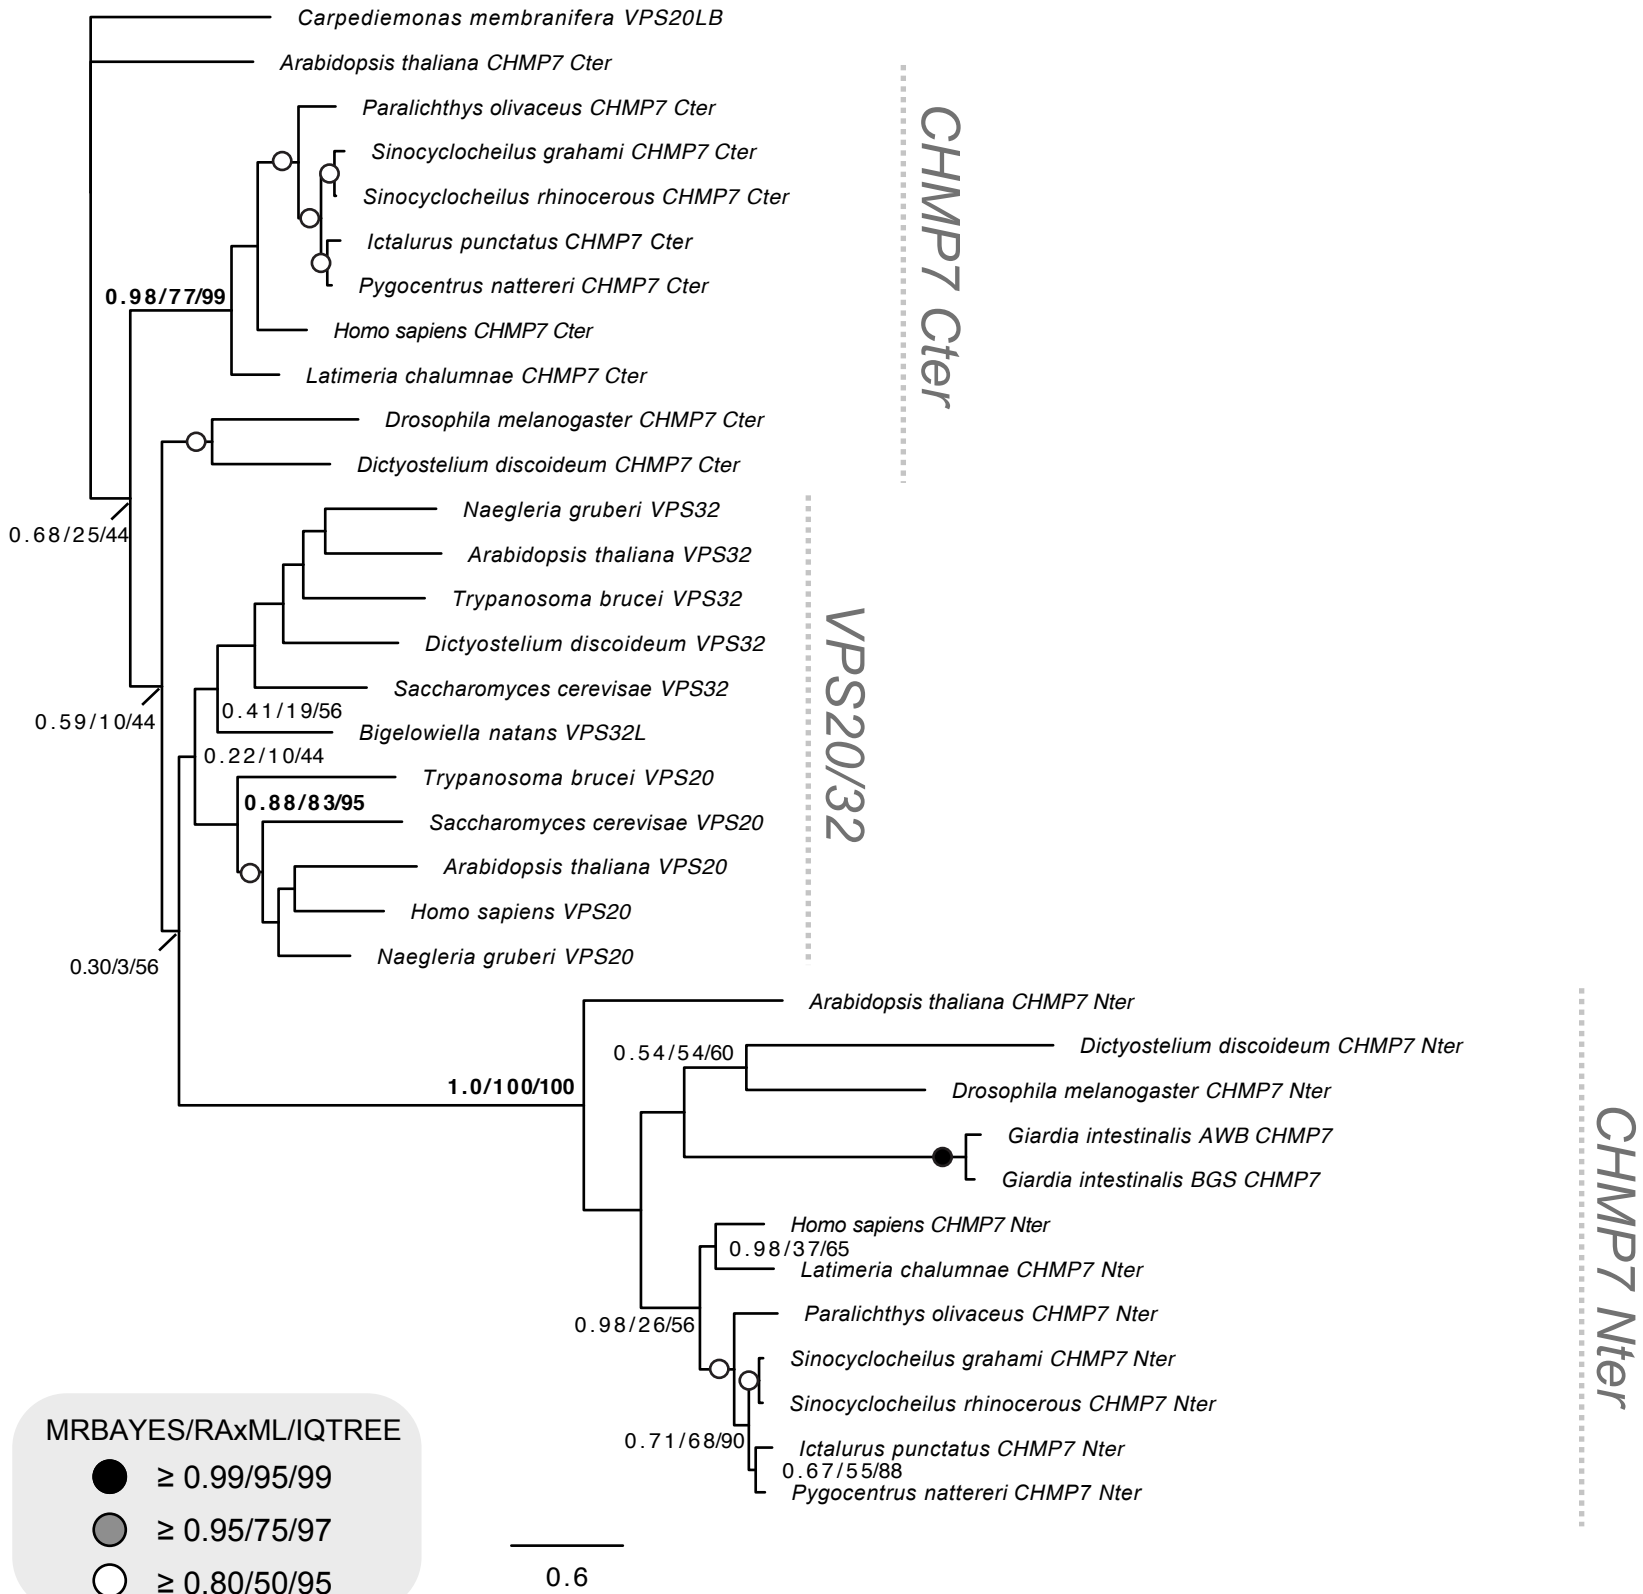

Supplementary Figure 11

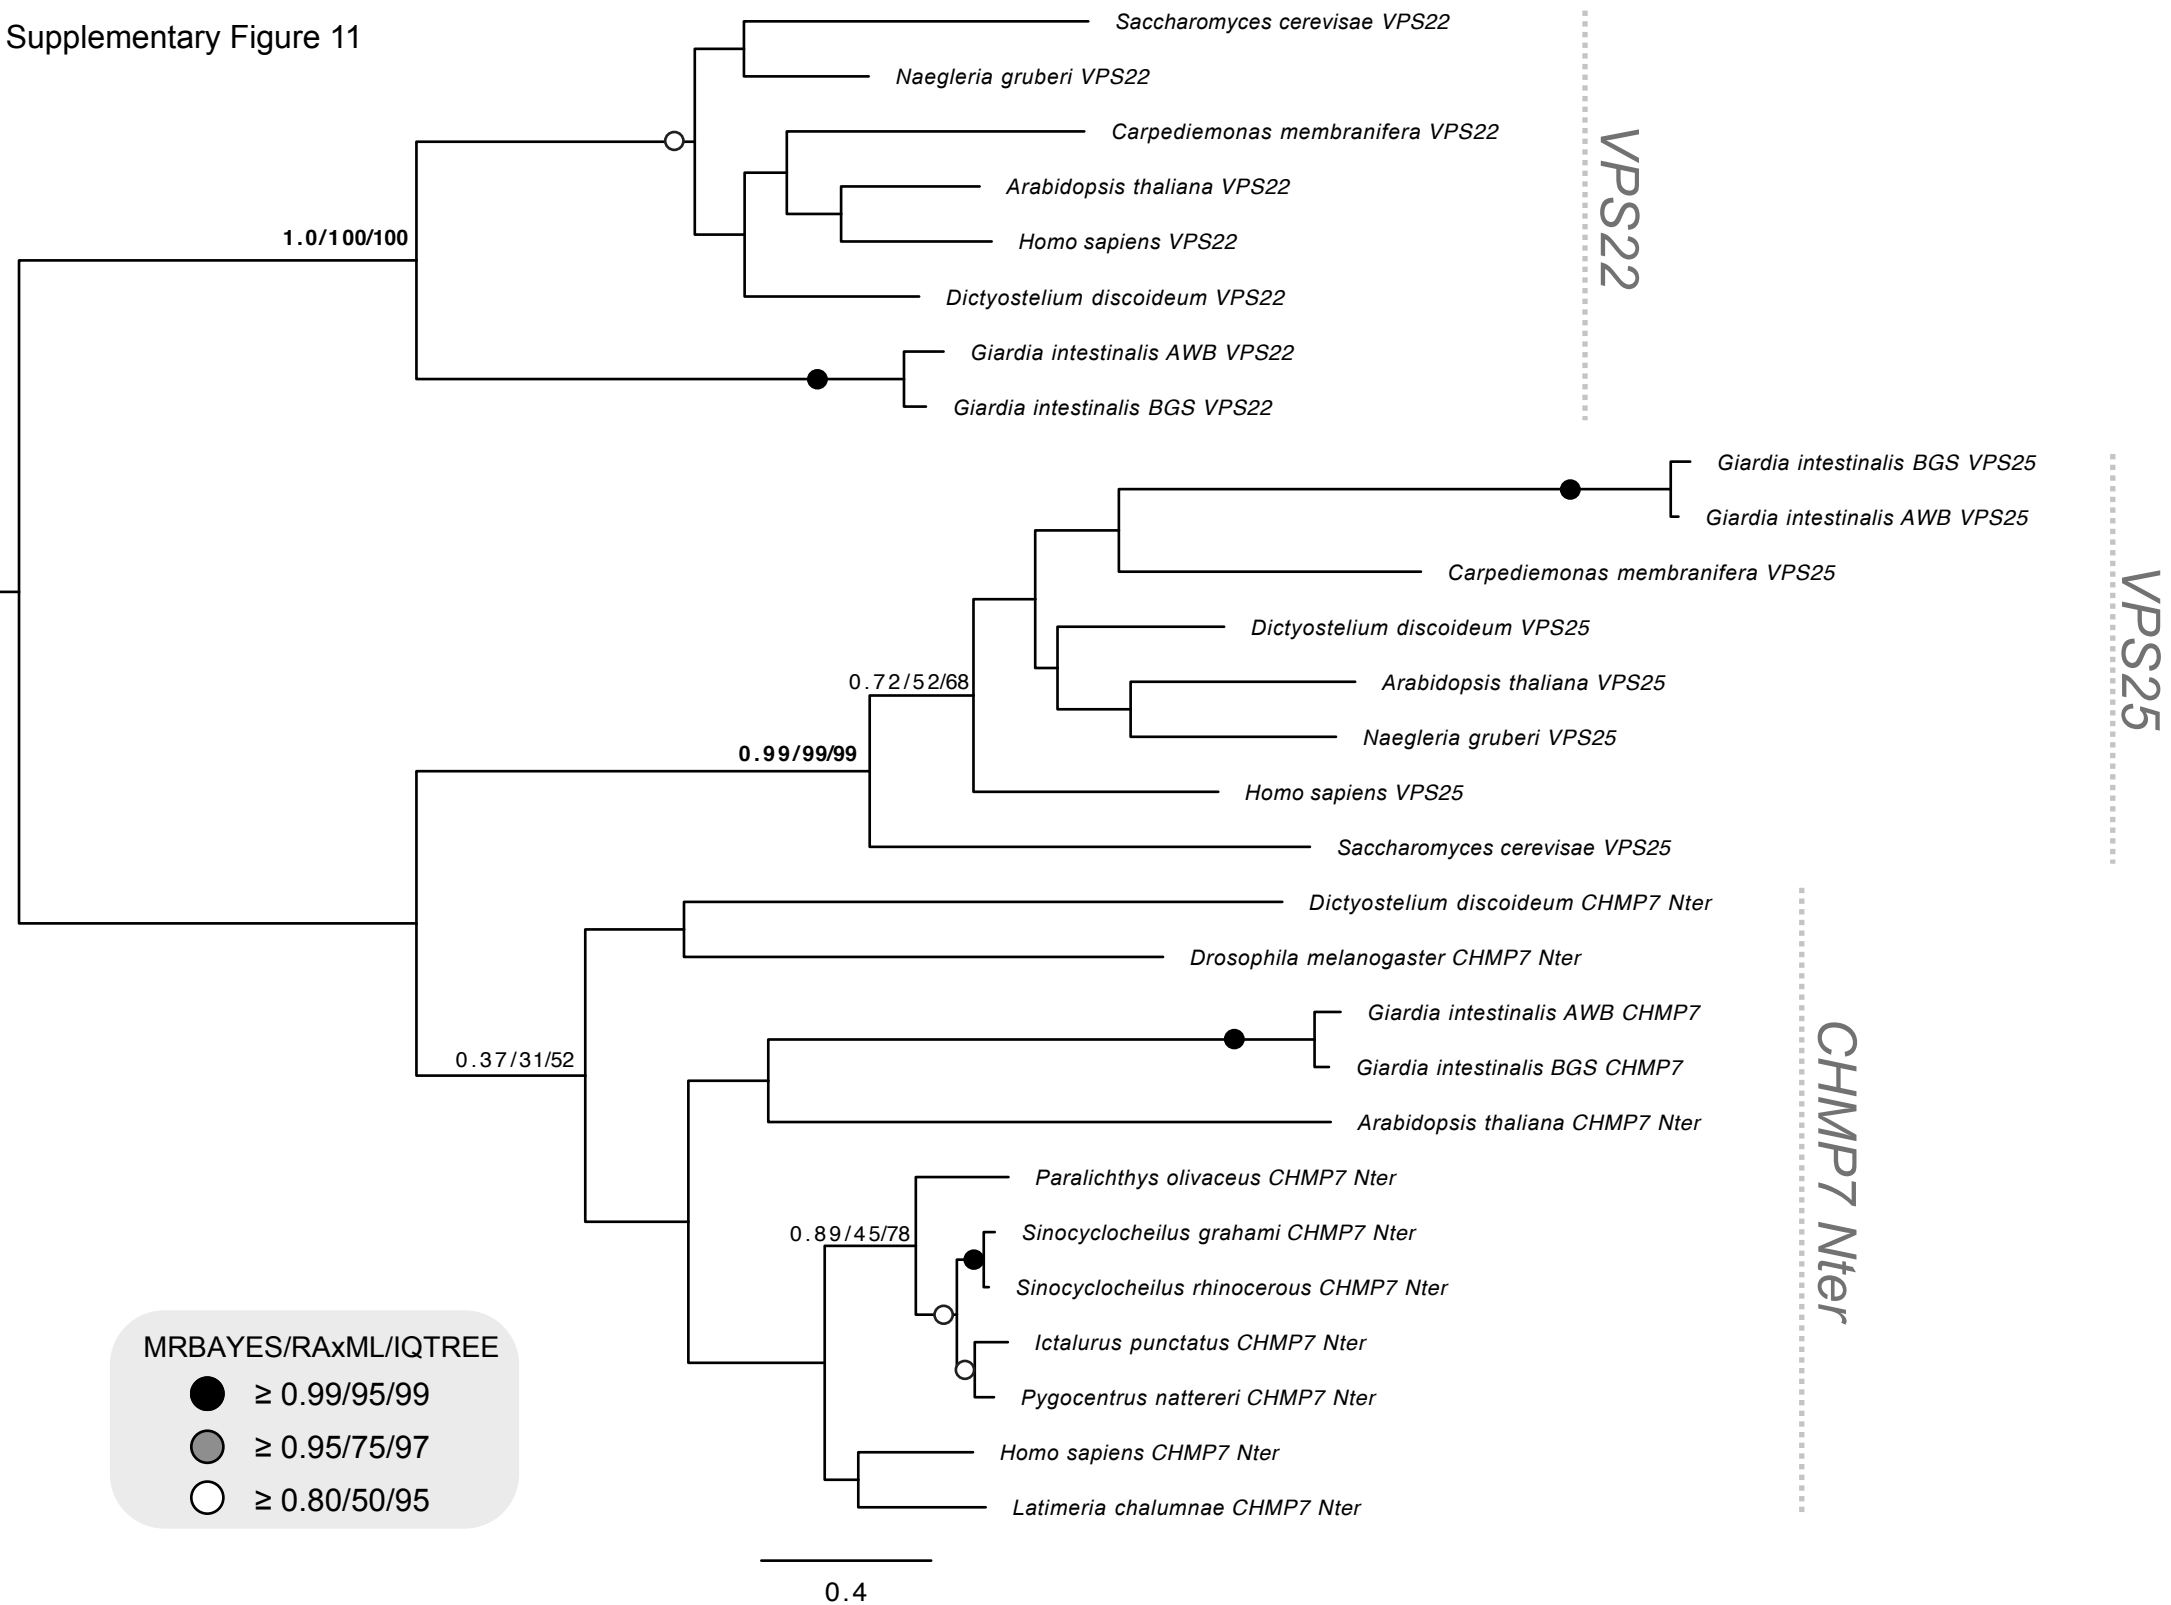

Source: https://www.biorxiv.org/content/10.1101/2021.02.11.430673v1.full.pdf
